# Supplementary material for: Photocatalytic cyclization of 3-(2-isocyanophenyl)quinazolin-4(3H)-ones for the construction of quinoxalino[2,1-b]quinazolinones
Source: Royal Society of Chemistry journal article supplement (doi:10.1039/d4cc00187g), 2024-01-01

# Supporting information

## Photocatalytic cyclization of 3-(2-isocyanophenyl)quinazolin-4(3*H*)-ones for the construction of quinoxalino[2,1-*b*]quinazolinones

Xian Wu, Lingli Liu, Chengli Xiang, Jin-Tao Yu\* and Changduo Pan\*

*Email: yujintao@cczu.edu.cn; panchangduo@jsut.edu.cn*

### Table of Contents

|                                                                          |            |
|--------------------------------------------------------------------------|------------|
| <b>1. General Considerations</b>                                         | <b>S2</b>  |
| <b>2. General Synthetic Procedures</b>                                   | <b>S2</b>  |
| <b>3. Mechanism Studies</b>                                              | <b>S3</b>  |
| <b>4. Characterization Data for the Substrates and Products</b>          | <b>S7</b>  |
| <b>5. References</b>                                                     | <b>S23</b> |
| <b>6. Copies of the <sup>1</sup>H NMR and <sup>13</sup>C NMR Spectra</b> | <b>S24</b> |

## 1. General Considerations

**General Information:** Unless otherwise noted, all chemicals were purchased and used without further purification.  $^1\text{H}$  NMR and  $^{13}\text{C}$  NMR spectra were recorded at ambient temperature on a 400 MHz NMR spectrometer (101 MHz for  $^{13}\text{C}$ ). NMR experiments are reported in  $\delta$  units, parts per million (ppm), and were referenced to  $\text{CDCl}_3$  ( $d$  7.26 or 77.0) as the internal standard. The coupling constants  $J$  are given in Hz. Column chromatography was performed using EM Silica gel 60 (300-400 mesh).

## 2. General Synthetic Procedures

### 2.1 General procedure for the synthesis of substrates 1:

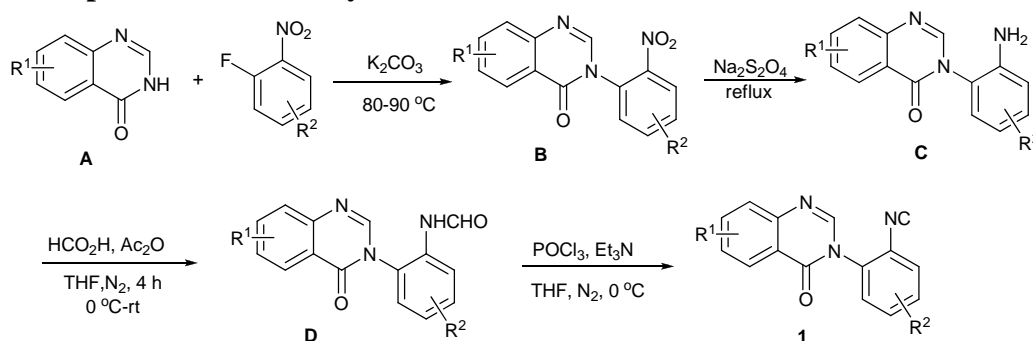

First, to a mixture of quinazolin-4(3H)-one **A** (10.0 mmol) in 25 mL of *N,N*-dimethylformamide (DMF) were added  $\text{K}_2\text{CO}_3$  (15.0 mmol, 1.5 equiv) and 1-fluoro-2-nitrobenzene (12 mmol, 1.2 equiv) sequentially. The mixture was refluxed at  $80-90\text{ }^\circ\text{C}$  for 8 h in a flask equipped with a guard tube. The reaction was quenched with  $\text{H}_2\text{O}$  and extracted with ethyl acetate ( $3\times 25\text{ mL}$ ). The combined organic layers were washed several times with  $\text{H}_2\text{O}$  and finally with brine solution, dried over anhydrous  $\text{Na}_2\text{SO}_4$ , and concentrated under vacuum. Crude product was recrystallized from ethyl acetate to obtain **B**.<sup>1</sup>

Then, a solution of  $\text{Na}_2\text{S}_2\text{O}_4$  (40.0 mmol, 5.0 equiv) in  $\text{H}_2\text{O}$  (80 mL) was added to the solution of **B** (8.0 mmol) in dioxane (80 mL). The reaction mixture was stirred at reflux temperature for 3 h then cooled to room temperature and was poured into water. The resulting precipitate was filtered off, washed with water ( $2\times 50\text{ mL}$ ) and dried in air to give **C**.<sup>2</sup>

Next, acetic formic anhydride (24.0 mmol), which was newly prepared from the reaction of acetic anhydride (2.3 mL, 24.0 mmol) with formic acid (1.1 mL, 27 mmol) at  $55\text{ }^\circ\text{C}$  for 2 h, was added dropwise to a mixture of **C** (4.0 mmol) in 6.0 mL THF at  $0\text{ }^\circ\text{C}$ . The mixture was warmed to room temperature and stirred for 3 h. Then, the reaction was quenched by saturated  $\text{NaHCO}_3$  and extracted with EtOAc. The combined organic layers were washed with brine, dried over anhydrous  $\text{Na}_2\text{SO}_4$  and concentrated in vacuum to give the products **D**. These formamides were used for the subsequent dehydration reaction without further purification.  $\text{POCl}_3$  (1.1 mL, 12.0 mmol) was added via syringe pump to a mixture of  $\text{Et}_3\text{N}$  (5.1 mL, 36.0 mmol) and **D** (4.0 mmol) in THF (6 mL) at  $0\text{ }^\circ\text{C}$  within 2 hours. After that, the resulting mixture was stirred at  $0\text{ }^\circ\text{C}$  for another 2 hours. Then, the mixture was quenched with Sat.

NaHCO<sub>3</sub> and extracted with CH<sub>2</sub>Cl<sub>2</sub>. The combined organic layer was washed with brine, dried over anhydrous Na<sub>2</sub>SO<sub>4</sub> and concentrated in vacuum. The residue was purified by chromatography on silica gel using petroleum ether/ethyl acetate as eluent to afford the products **1** in 30-70% yield.<sup>3</sup>

## 2.2 General procedure for the synthesis of products **3**.

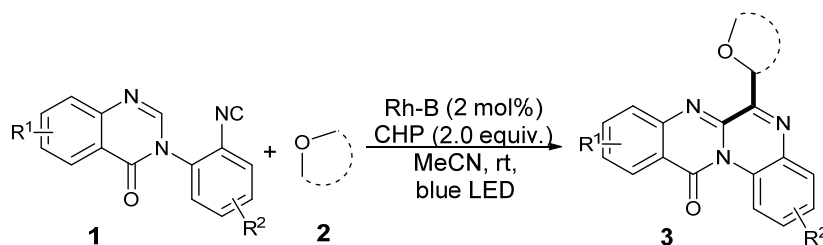

The mixture of 3-(2-Isocyanophenyl)quinazolin-4(3*H*)-ones **1** (0.2 mmol), Rhodamine B (2 mol%, 1.9 mg), CHP (2.0 equiv, 60.9 mg), THF (1 mL) and MeCN (1 mL) was added into a Schlenk tube and sealed. The tube was evacuated and backfilled with nitrogen (repeated five times). The mixture was stirred at room temperature for 12 hours under the irradiation of 10 W blue LED. Then, the solvent was evaporated under reduced pressure, and purified by silica gel flash column chromatography to give the products **3**.

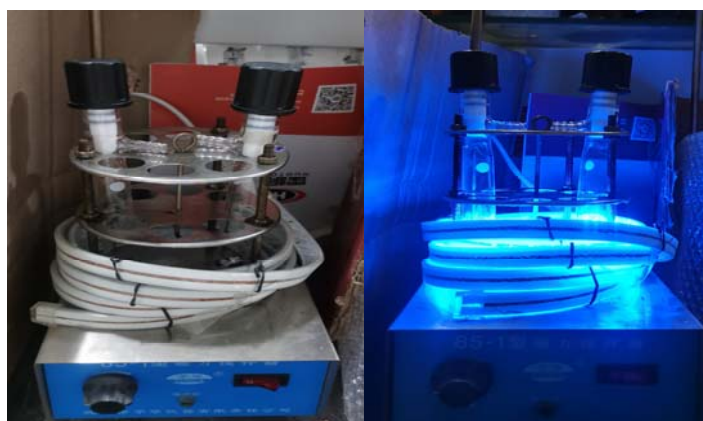

**Figure S1** Photoreactor used in this work.

## 3. Mechanism Studies

### 3.1 The KIE experiment:

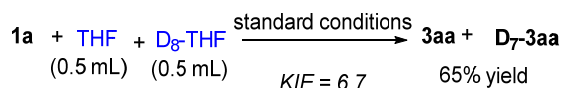

The mixture of **1a** (0.2 mmol), Rhodamine B (2 mol%, 1.9 mg), CHP (2.0 equiv, 60.9 mg), THF (0.5 mL), D<sub>8</sub>-THF (0.5 mL) and MeCN (1 mL) was added into a Schlenk tube and sealed. The tube was evacuated and backfilled with nitrogen (repeated for five times). The mixture was stirred at room temperature for 8 hours under the irradiation of 10 W blue LEDs. Then, the solvent was evaporated under reduced pressure, and purified by silica gel flash column chromatography to give product **3aa** and **D<sub>7</sub>-3aa** in 65% total yield. A KIE value of

6.7 was observed from  $^1\text{H}$  NMR spectrum.

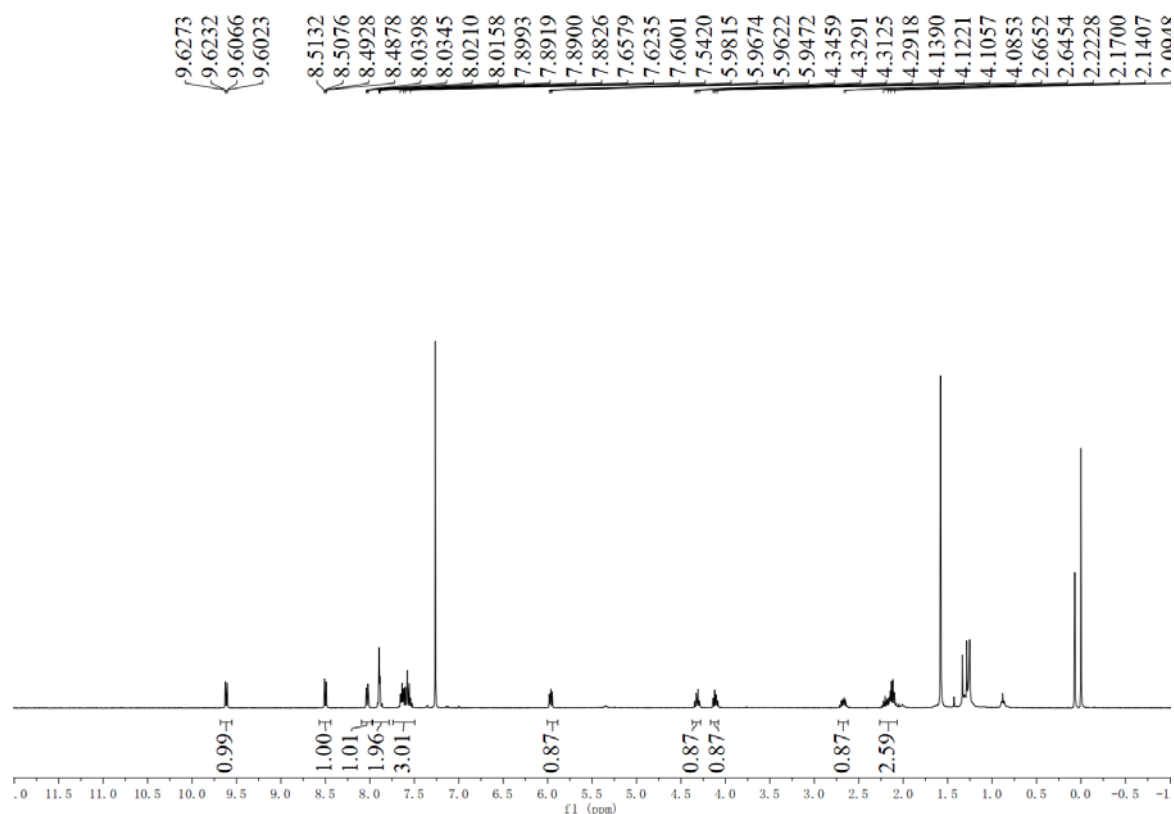

**Figure S2.**  $^1\text{H}$  NMR spectrum of the KIE experiment

### 3.2 Radical inhibiting and trapping experiment

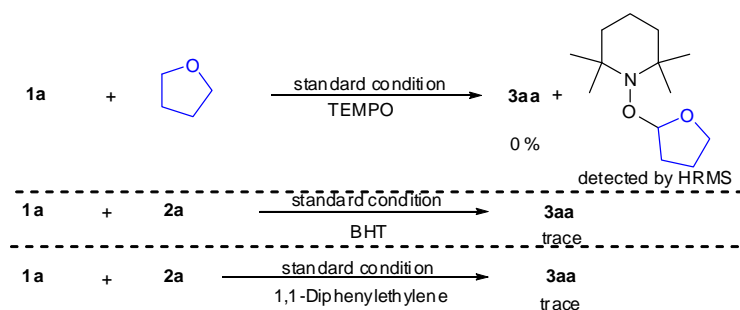

Under standard conditions, TEMPO (2.0 equiv., 0.4 mmol, 62.5 mg; or 1 equiv., 0.2 mmol, 31.2 mg), BHT (2.0 equiv, 0.4 mmol, 88.1 mg; or 1 equiv, 0.2 mmol, 44 mg) or 1,1-diphenylethylene (2.0 equiv, 0.4 mmol, 72.0 mg; or 1 equiv., 0.2 mmol, 36 mg) was added into a Schlenk tube and sealed. The tube was evacuated and backfilled with nitrogen (repeated five times). The mixture was stirred at room temperature for 12 hours under the irradiation of 10 W blue LEDs.

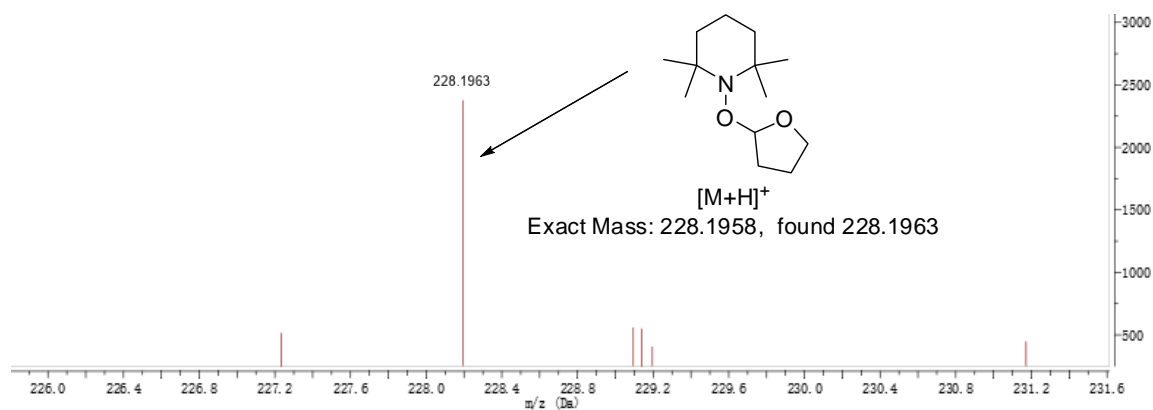

**Figure S3.** The adduct of TEMPO and tetrahydrofuran-2-yl radical detected by HRMS.

### 3.3 Cyclic voltammetry study

Cyclic voltammetry measurements were performed in a three-electrode cell (volume 5 mL) with glassy carbon as the working electrode, Pt wire as the auxiliary electrode, and SCE (saturated calomel electrode) as the reference electrode. The electrodes are first polished with sandpaper, then with alumina powder until the surface of the electrodes is mirror-like. Finally, the electrodes are washed with distilled water and ultrasonication. The solvent (MeCN) exhaust employs a nitrogen blast for 30 min. CHP (1 mM) was tested with tetrabutylammonium hexafluorophosphate (0.1 M) as the supporting electrolyte in 30 mL MeCN, respectively. Solutions were kept under positive pressure of nitrogen during the measurements. Cyclic voltammetry (CV) with the following settings: Scan Rates = 0.1 V/s, Sweep Segments = 10, Sample Interval = 0.001 V, Quiet Time = 2 sec. The redox potentials of CHP is  $E_{1/2}^{\text{red}} = -0.89$  V vs SCE.

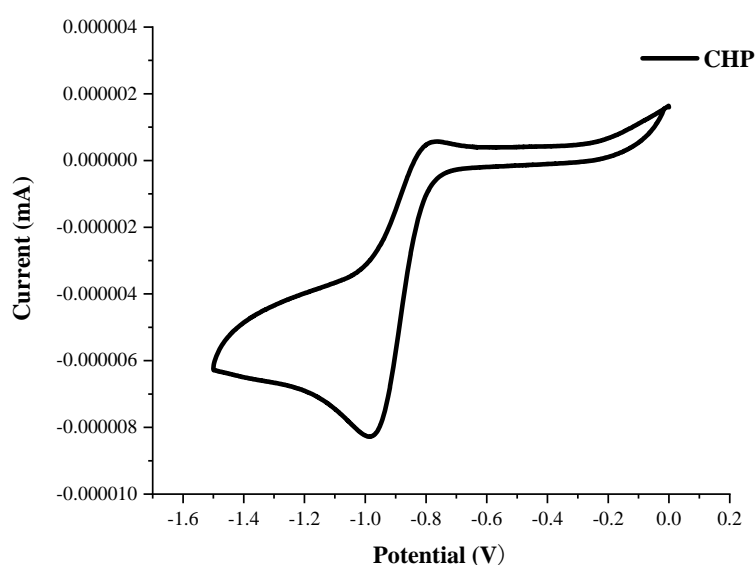

**Figure S4.** Cyclic voltammetry plots of CHP. Scan direction: from 0 V to -1.5 V, then back to 0 V

### 3.4 Alternative mechanism

Control experiments indicated that 23% yield of **3aa** was obtained in the absence of photocatalyst, and no reaction occurred in the absence of both photocatalyst and light irradiation. Moreover, the reaction did not occur in the presence of ambient oxygen or (*E*)-stilbene. Those results indicated that an energy transfer process may be involved as proposed in Scheme S1.

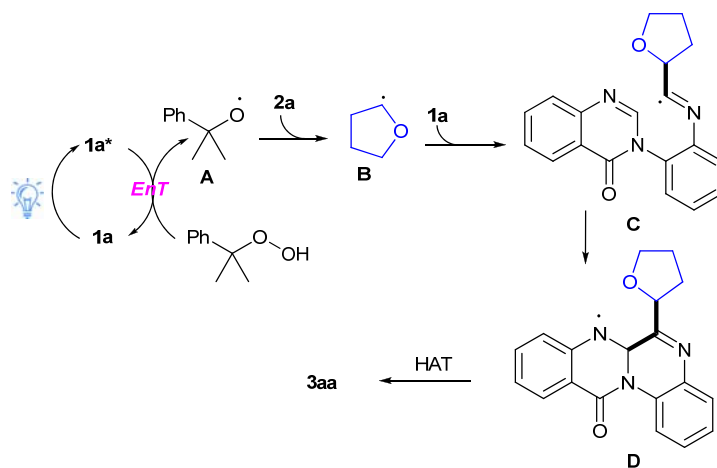

**Scheme S1.** Alternative mechanism involving the EnT process.

#### 4. Characterization Data for the Substrates and Products

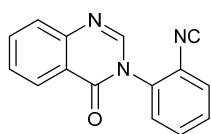

**3-(2-Isocyanophenyl)quinazolin-4(3H)-one (1a**, 692.3 mg, 70% yield), flash column chromatography on silica gel (petroleum ether/ethyl acetate 2/1) gave yellow solid;  $^1\text{H}$  NMR (400 MHz,  $\text{CDCl}_3$ ):  $\delta$  = 8.37-8.34 (m, 1H), 7.99 (s, 1H), 7.85-7.77 (m, 2H), 7.62-7.54 (m, 4H), 7.49-7.47 (m, 1H);  $^{13}\text{C}$  NMR (101 MHz,  $\text{CDCl}_3$ ):  $\delta$  = 170.3, 156.0, 147.8, 144.9, 135.1, 133.8, 130.7, 130.6, 129.3, 128.2, 128.1, 127.9, 127.3, 124.9, 122.1; HRMS (ESI)  $m/z$  calcd for  $\text{C}_{15}\text{H}_{10}\text{N}_3\text{O}$   $[\text{M}+\text{H}]^+$  248.0818, found 248.0811.

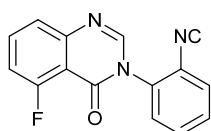

**5-Fluoro-3-(2-isocyanophenyl)quinazolin-4(3H)-one (1b**, 689.6 mg, 65% yield), flash column chromatography on silica gel (petroleum ether/ethyl acetate 2/1) gave yellow solid;  $^1\text{H}$  NMR (400 MHz,  $\text{CDCl}_3$ ):  $\delta$  = 7.97 (s, 1H), 7.79-7.74 (m, 1H), 7.63-7.57 (m, 4H), 7.49-7.47 (m, 1H), 7.24-7.19 (m, 1H);  $^{13}\text{C}$  NMR (101 MHz,  $\text{CDCl}_3$ ):  $\delta$  = 170.5, 161.6 (d,  $J_{\text{C-F}}$  = 268.7 Hz), 156.9 (d,  $J_{\text{C-F}}$  = 4.1 Hz), 149.8, 145.7, 135.7, 135.6 (d,  $J_{\text{C-F}}$  = 10.4 Hz), 133.4, 130.8, 130.7, 129.4, 128.1, 123.8 (d,  $J_{\text{C-F}}$  = 4.2 Hz), 114.9 (d,  $J_{\text{C-F}}$  = 20.8 Hz), 111.9 (d,  $J_{\text{C-F}}$  = 6.1 Hz); HRMS (ESI)  $m/z$  calcd for  $\text{C}_{15}\text{H}_8\text{FN}_3\text{O}$   $[\text{M}+\text{Na}]^+$  288.0544, found 288.0556.

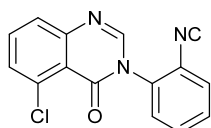

**5-Chloro-3-(2-isocyanophenyl)quinazolin-4(3H)-one (1c**, 709.9 mg, 63% yield), flash column chromatography on silica gel (petroleum ether/ethyl acetate 2/1) gave yellow solid;  $^1\text{H}$  NMR (400 MHz,  $\text{CDCl}_3$ ):  $\delta$  = 7.98 (s, 1H), 7.68-7.67 (m, 2H), 7.61-7.54 (m, 4H), 7.50-7.48 (m, 1H);  $^{13}\text{C}$  NMR (101 MHz,  $\text{CDCl}_3$ ):  $\delta$  = 170.4, 158.1, 150.2, 145.5, 134.9, 134.5, 133.5, 130.9, 130.8, 130.7, 129.4, 128.1, 127.2, 124.9, 119.4; HRMS (ESI)  $m/z$  calcd for  $\text{C}_{15}\text{H}_8\text{ClN}_3\text{O}$   $[\text{M}+\text{H}]^+$  282.0429, found 282.0417.

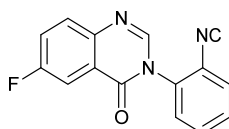

**6-Fluoro-3-(2-isocyanophenyl)quinazolin-4(3H)-one (1d**, 647.2 mg, 61% yield), flash column chromatography on silica gel (petroleum ether/ethyl acetate 2/1) gave yellow solid;  $^1\text{H}$  NMR (400 MHz,  $\text{CDCl}_3$ ):  $\delta$  = 8.00-7.96 (m, 2H), 7.82-7.79 (m, 1H), 7.64-7.52 (m, 4H),

7.50-7.47 (m, 1H);  $^{13}\text{C}$  NMR (101 MHz,  $\text{CDCl}_3$ ):  $\delta$  = 170.4, 161.6 (d,  $J_{\text{C-F}}$  = 251.1 Hz), 159.3 (d,  $J_{\text{C-F}}$  = 3.2 Hz), 144.4 (d,  $J_{\text{C-F}}$  = 2.1 Hz), 144.2 (d,  $J_{\text{C-F}}$  = 2.5 Hz), 133.6, 130.8, 130.7, 130.4 (d,  $J_{\text{C-F}}$  = 8.2 Hz), 129.2, 128.2, 123.6 (d,  $J_{\text{C-F}}$  = 24.0 Hz), 123.5, 112.4 (d,  $J_{\text{C-F}}$  = 24.1 Hz); HRMS (ESI)  $m/z$  calcd for  $\text{C}_{15}\text{H}_8\text{FN}_3\text{O}$   $[\text{M}+\text{H}]^+$  266.0724, found 266.0715.

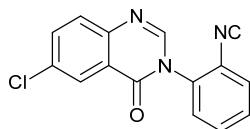

**6-Chloro-3-(2-isocyanophenyl)quinazolin-4(3H)-one (1e**, 619.7 mg, 55% yield), flash column chromatography on silica gel (petroleum ether/ethyl acetate 2/1) gave yellow solid;  $^1\text{H}$  NMR (400 MHz,  $\text{CDCl}_3$ ):  $\delta$  = 8.31 (m, 1H), 7.98 (s, 1H), 7.78-7.72 (m, 2H), 7.63-7.58 (m, 3H), 7.49-7.47 (m, 1H);  $^{13}\text{C}$  NMR (101 MHz,  $\text{CDCl}_3$ ):  $\delta$  = 170.5, 159.0, 146.3, 145.0, 135.5, 134.0, 133.5, 130.9, 130.8, 129.6, 129.1, 128.2, 126.7, 124.8, 123.2; HRMS (ESI)  $m/z$  calcd for  $\text{C}_{15}\text{H}_8\text{ClN}_3\text{O}$   $[\text{M}+\text{H}]^+$  282.0429, found 282.0421.

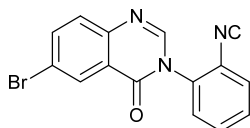

**6-Bromo-3-(2-isocyanophenyl)quinazolin-4(3H)-one (1f**, 769.7 mg, 59% yield), flash column chromatography on silica gel (petroleum ether/ethyl acetate 2/1) gave yellow solid;  $^1\text{H}$  NMR (400 MHz,  $\text{CDCl}_3$ ):  $\delta$  = 8.46 (d,  $J$  = 2.3 Hz, 1H), 7.99 (s, 1H), 7.90 (m, 1H), 7.67-7.58 (m, 4H), 7.52-7.43 (m, 1H);  $^{13}\text{C}$  NMR (101 MHz,  $\text{CDCl}_3$ ):  $\delta$  = 170.5, 158.8, 146.6, 145.2, 138.3, 133.5, 130.9, 130.8, 129.8, 129.7, 129.1, 128.2, 127.2, 123.5, 121.8; HRMS (ESI)  $m/z$  calcd for  $\text{C}_{15}\text{H}_8\text{BrN}_3\text{O}$   $[\text{M}+\text{H}]^+$  325.9924, found 325.9929.

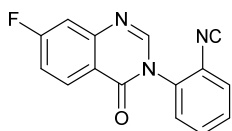

**7-Fluoro-3-(2-isocyanophenyl)quinazolin-4(3H)-one (1g**, 498.7 mg, 47% yield), flash column chromatography on silica gel (petroleum ether/ethyl acetate 2/1) gave yellow solid;  $^1\text{H}$  NMR (400 MHz,  $\text{CDCl}_3$ ):  $\delta$  = 8.39 (m, 1H), 8.02 (s, 1H), 7.65-7.59 (m, 3H), 7.51-7.43 (m, 2H), 7.32-7.27 (m, 1H);  $^{13}\text{C}$  NMR (101 MHz,  $\text{CDCl}_3$ ):  $\delta$  = 170.4, 166.8 (d,  $J_{\text{C-F}}$  = 256.9 Hz), 159.2, 150.0 (d,  $J_{\text{C-F}}$  = 12.9 Hz), 146.1, 133.5, 130.8, 130.7, 130.1 (d,  $J_{\text{C-F}}$  = 10.8 Hz), 129.2, 128.2, 118.8 (d,  $J_{\text{C-F}}$  = 2.2 Hz), 116.8 (d,  $J_{\text{C-F}}$  = 23.6 Hz), 113.5 (d,  $J_{\text{C-F}}$  = 22.3 Hz); HRMS (ESI)  $m/z$  calcd for  $\text{C}_{15}\text{H}_8\text{FN}_3\text{O}$   $[\text{M}+\text{H}]^+$  266.0724, found 266.0719.

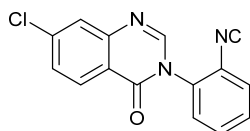



**7-Chloro-3-(2-isocyanophenyl)quinazolin-4(3H)-one (1h)**, 439.5 mg, 39% yield), flash column chromatography on silica gel (petroleum ether/ethyl acetate 2/1) gave yellow solid;  $^1\text{H}$  NMR (400 MHz,  $\text{CDCl}_3$ ):  $\delta$  = 8.28 (d,  $J$  = 8.5 Hz, 1H), 8.00 (s, 1H), 7.77 (d,  $J$  = 2.0 Hz, 1H), 7.63-7.57 (m, 3H), 7.53-7.46 (m, 2H);  $^{13}\text{C}$  NMR (101 MHz,  $\text{CDCl}_3$ ):  $\delta$  = 170.5, 159.4, 148.7, 146.1, 141.4, 133.5, 130.9, 130.8, 129.2, 128.8, 128.7, 128.2, 127.5, 124.8, 120.6; HRMS (ESI)  $m/z$  calcd for  $\text{C}_{15}\text{H}_8\text{ClN}_3\text{NaO}$   $[\text{M}+\text{Na}]^+$  304.0248, found 304.0241.

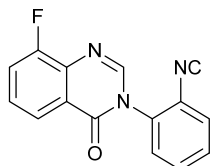

**8-Fluoro-3-(2-isocyanophenyl)quinazolin-4(3H)-one (1i)**, 424.4 mg, 40% yield), flash column chromatography on silica gel (petroleum ether/ethyl acetate 2/1) gave yellow solid;  $^1\text{H}$  NMR (400 MHz,  $\text{CDCl}_3$ ):  $\delta$  = 8.15-8.12 (m, 1H), 8.03 (s, 1H), 7.64-7.48 (m, 6H);  $^{13}\text{C}$  NMR (101 MHz,  $\text{CDCl}_3$ ):  $\delta$  = 170.5, 159.0 (d,  $J_{\text{C-F}}$  = 3.1 Hz), 157.2 (d,  $J_{\text{C-F}}$  = 257.8 Hz), 145.4, 137.1 (d,  $J_{\text{C-F}}$  = 12.2 Hz), 133.5, 130.9, 130.8, 129.1, 128.4 (d,  $J_{\text{C-F}}$  = 7.8 Hz), 128.2, 123.9, 122.8 (d,  $J_{\text{C-F}}$  = 4.3 Hz), 120.7 (d,  $J_{\text{C-F}}$  = 19.0 Hz); HRMS (ESI)  $m/z$  calcd for  $\text{C}_{15}\text{H}_8\text{FN}_3\text{NaO}$   $[\text{M}+\text{Na}]^+$  288.0544, found 288.0546.

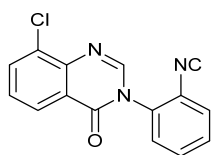

**8-Chloro-3-(2-isocyanophenyl)quinazolin-4(3H)-one (1j)**, 473.3 mg, 42% yield), flash column chromatography on silica gel (petroleum ether/ethyl acetate 2/1) gave yellow solid;  $^1\text{H}$  NMR (400 MHz,  $\text{CDCl}_3$ ):  $\delta$  = 8.28-8.25 (m, 1H), 8.10 (s, 1H), 7.91-7.89 (m, 1H), 7.64-7.56 (m, 3H), 7.51-7.47 (m, 2H);  $^{13}\text{C}$  NMR (101 MHz,  $\text{CDCl}_3$ ):  $\delta$  = 170.6, 159.4, 145.6, 144.5, 135.4, 133.4, 132.2, 131.0, 130.8, 129.1, 128.3, 128.2, 126.2, 124.8, 123.7; HRMS (ESI)  $m/z$  calcd for  $\text{C}_{15}\text{H}_8\text{ClN}_3\text{O}$   $[\text{M}+\text{H}]^+$  282.0429, found 282.0417.

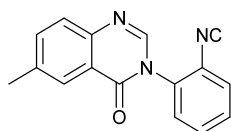

**3-(2-Isocyanophenyl)-6-methylquinazolin-4(3H)-one (1k)**, 606.2 mg, 58% yield), flash column chromatography on silica gel (petroleum ether/ethyl acetate 2/1) gave yellow solid;  $^1\text{H}$  NMR (400 MHz,  $\text{CDCl}_3$ ):  $\delta$  = 8.14 (s, 1H), 7.94 (s, 1H), 7.68-7.53 (m, 5H), 7.48-7.46 (m, 1H), 2.50 (s, 3H);  $^{13}\text{C}$  NMR (101 MHz,  $\text{CDCl}_3$ ):  $\delta$  = 170.2, 160.0, 145.7, 144.1, 138.5, 136.7, 134.0, 130.7, 130.6, 129.2, 128.1, 127.7, 126.7, 124.9, 121.8, 21.4; HRMS (ESI)  $m/z$  calcd for  $\text{C}_{16}\text{H}_{11}\text{N}_3\text{O}$   $[\text{M}+\text{H}]^+$  262.0975, found 262.0975.

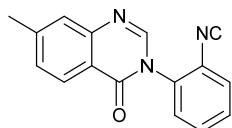

**3-(2-Isocyanophenyl)-7-methylquinazolin-4(3H)-one (1l**, 459.9 mg, 44% yield), flash column chromatography on silica gel (petroleum ether/ethyl acetate 2/1) gave yellow solid;  $^1\text{H}$  NMR (400 MHz,  $\text{CDCl}_3$ ):  $\delta$  = 8.24 (d,  $J$  = 8.1 Hz, 1H), 7.97 (s, 1H), 7.62-7.54 (m, 4H), 7.49-7.47 (m, 1H), 7.38 (d,  $J$  = 8.1 Hz, 1H), 2.53 (s, 3H);  $^{13}\text{C}$  NMR (101 MHz,  $\text{CDCl}_3$ ):  $\delta$  = 170.2, 160.0, 147.9, 146.3, 144.9, 133.9, 130.7, 130.6, 129.6, 129.3, 128.1, 127.7, 127.1, 125.0, 119.6, 22.0; HRMS (ESI)  $m/z$  calcd for  $\text{C}_{16}\text{H}_{11}\text{N}_3\text{O}$   $[\text{M}+\text{H}]^+$  262.0975, found 262.0979.

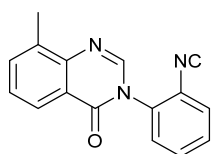

**3-(2-Isocyanophenyl)-8-methylquinazolin-4(3H)-one (1m**, 658.4 mg, 63% yield), flash column chromatography on silica gel (petroleum ether/ethyl acetate 2/1) gave yellow solid;  $^1\text{H}$  NMR (400 MHz,  $\text{CDCl}_3$ ):  $\delta$  = 8.22-8.19 (m, 1H), 8.01 (s, 1H), 7.67 (d,  $J$  = 7.4 Hz, 1H), 7.62-7.53 (m, 3H), 7.49-7.42 (m, 2H), 2.65 (s, 3H);  $^{13}\text{C}$  NMR (101 MHz,  $\text{CDCl}_3$ ):  $\delta$  = 170.2, 160.4, 146.3, 143.6, 136.4, 135.8, 134.0, 130.7, 130.6, 129.3, 128.1, 127.6, 125.0, 123.8, 122.1, 17.6; HRMS (ESI)  $m/z$  calcd for  $\text{C}_{16}\text{H}_{11}\text{N}_3\text{O}$   $[\text{M}+\text{H}]^+$  262.0975, found 262.0968.

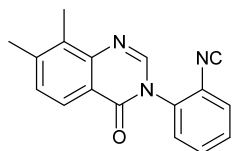

**3-(2-Isocyanophenyl)-7,8-dimethylquinazolin-4(3H)-one (1n**, 649.7 mg, 59% yield), flash column chromatography on silica gel (petroleum ether/ethyl acetate 2/1) gave yellow solid;  $^1\text{H}$  NMR (400 MHz,  $\text{CDCl}_3$ ):  $\delta$  = 8.12 (d,  $J$  = 8.1 Hz, 1H), 7.98 (s, 1H), 7.62-7.54 (m, 3H), 7.49-7.47 (m, 1H), 7.37 (d,  $J$  = 8.1 Hz, 1H), 2.59 (s, 3H), 2.47 (s, 3H);  $^{13}\text{C}$  NMR (101 MHz,  $\text{CDCl}_3$ ):  $\delta$  = 170.1, 160.5, 146.1, 144.4, 143.3, 134.5, 134.1, 130.6, 130.5, 129.9, 129.3, 128.1, 124.9, 124.1, 120.0, 21.2, 13.3; HRMS (ESI)  $m/z$  calcd for  $\text{C}_{17}\text{H}_{13}\text{N}_3\text{O}$   $[\text{M}+\text{H}]^+$  276.1131, found 276.1120.

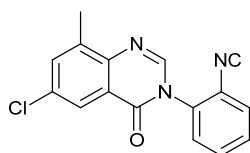

**6-Chloro-3-(2-isocyanophenyl)-8-methylquinazolin-4(3H)-one (1o**, 674.3 mg, 57% yield), flash column chromatography on silica gel (petroleum ether/ethyl acetate 2/1) gave yellow solid;  $^1\text{H}$  NMR (400 MHz,  $\text{CDCl}_3$ ):  $\delta$  = 8.15 (d,  $J$  = 2.5 Hz, 1H), 7.98 (s, 1H), 7.62-7.57 (m, 4H), 7.48-7.46 (m, 1H), 2.63 (s, 3H);  $^{13}\text{C}$  NMR (101 MHz,  $\text{CDCl}_3$ ):  $\delta$  = 170.4, 159.4, 145.0,

143.8, 138.8, 135.8, 133.6, 133.4, 130.78, 130.75, 129.1, 128.2, 124.8, 124.2, 123.2, 17.5; HRMS (ESI)  $m/z$  calcd for  $C_{16}H_{10}ClN_3O$   $[M+H]^+$  296.0585, found 296.0593.

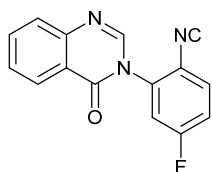

**3-(5-Fluoro-2-isocyanophenyl)quinazolin-4(3H)-one (1p)**, 456.2 mg, 43% yield), flash column chromatography on silica gel (petroleum ether/ethyl acetate 2/1) gave yellow solid;  $^1H$  NMR (400 MHz,  $CDCl_3$ ):  $\delta$  = 8.38-8.36 (m, 1H), 7.99 (s, 1H), 7.88-7.79 (m, 2H), 7.65-7.58 (m, 2H), 7.33-7.26 (m, 2H);  $^{13}C$  NMR (101 MHz,  $CDCl_3$ ):  $\delta$  = 170.6, 162.2 (d,  $J_{C-F}$  = 256.9 Hz), 159.7, 147.6, 144.2, 135.4, 135.3, 129.7 (d,  $J_{C-F}$  = 9.5 Hz), 128.3, 128.0, 127.3, 122.0, 118.0 (d,  $J_{C-F}$  = 23.1 Hz), 117.3 (d,  $J_{C-F}$  = 25.2 Hz); HRMS (ESI)  $m/z$  calcd for  $C_{15}H_8FN_3O$   $[M+H]^+$  266.0724, found 266.0715.

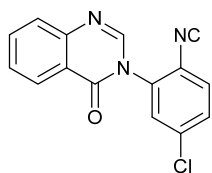

**3-(5-Chloro-2-isocyanophenyl)quinazolin-4(3H)-one (1q)**, 450.7 mg, 40% yield), flash column chromatography on silica gel (petroleum ether/ethyl acetate 2/1) gave yellow solid;  $^1H$  NMR (400 MHz,  $CDCl_3$ ):  $\delta$  = 8.38-8.35 (m, 1H), 7.97 (s, 1H), 7.87-7.79 (m, 2H), 7.61-7.52 (m, 4H);  $^{13}C$  NMR (101 MHz,  $CDCl_3$ ):  $\delta$  = 171.7, 159.8, 147.6, 144.2, 136.4, 135.3, 134.8, 131.0, 129.7, 129.0, 128.3, 128.0, 127.3, 124.4, 122.0; HRMS (ESI)  $m/z$  calcd for  $C_{15}H_8ClN_3O$   $[M+H]^+$  282.0429, found 282.0418.

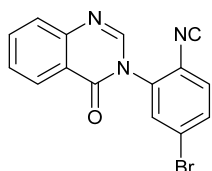

**3-(5-Bromo-2-isocyanophenyl)quinazolin-4(3H)-one (1r)**, 587.1 mg, 45% yield), flash column chromatography on silica gel (petroleum ether/ethyl acetate 2/1) gave yellow solid;  $^1H$  NMR (400 MHz,  $CDCl_3$ ):  $\delta$  = 8.36-8.34 (m, 1H), 7.97 (s, 1H), 7.86-7.82 (m, 1H), 7.80-7.77 (m, 1H), 7.72-7.66 (m, 2H), 7.60-7.56 (m, 1H), 7.48 (d,  $J$  = 8.5 Hz, 1H);  $^{13}C$  NMR (101 MHz,  $CDCl_3$ ):  $\delta$  = 171.9, 159.8, 147.6, 144.2, 135.3, 134.8, 133.9, 132.5, 129.1, 128.3, 128.0, 127.3, 124.0, 123.9, 121.9; HRMS (ESI)  $m/z$  calcd for  $C_{15}H_8BrN_3O$   $[M+H]^+$  325.9924, found 325.9917.

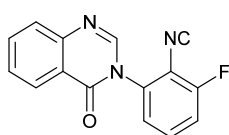

**3-(3-Fluoro-2-isocyanophenyl)quinazolin-4(3H)-one (1s)**, 318.3 mg, 30% yield), flash

column chromatography on silica gel (petroleum ether/ethyl acetate 2/1) gave yellow solid;  $^1\text{H}$  NMR (400 MHz,  $\text{CDCl}_3$ ):  $\delta$  = 8.36 (d,  $J$  = 8.0 Hz, 1H), 7.99 (s, 1H), 7.86-7.78 (m, 2H), 7.61-7.56 (m, 2H), 7.41 (t,  $J$  = 8.5 Hz, 1H), 7.30 (d,  $J$  = 8.1 Hz, 1H);  $^{13}\text{C}$  NMR (101 MHz,  $\text{CDCl}_3$ ):  $\delta$  = 176.3, 159.7, 158.2 (d,  $J_{\text{C-F}}$  = 261.2 Hz), 147.6, 144.3, 135.3, 135.2, 131.0 (d,  $J_{\text{C-F}}$  = 8.9 Hz), 128.3, 128.0, 127.4, 124.5 (d,  $J_{\text{C-F}}$  = 3.6 Hz), 121.9, 117.9 (d,  $J_{\text{C-F}}$  = 18.9 Hz); HRMS (ESI)  $m/z$  calcd for  $\text{C}_{15}\text{H}_8\text{FN}_3\text{O}$   $[\text{M}+\text{H}]^+$  266.0724, found 266.0717.

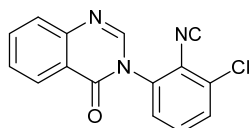

**3-(3-Chloro-2-isocyanophenyl)quinazolin-4(3H)-one (1t)**, 428.2 mg, 38% yield), flash column chromatography on silica gel (petroleum ether/ethyl acetate 2/1) gave yellow solid;  $^1\text{H}$  NMR (400 MHz,  $\text{CDCl}_3$ ):  $\delta$  = 8.38-7.36 (m, 1H), 7.99 (s, 1H), 7.88-7.79 (m, 2H), 7.70-7.67 (m, 1H), 7.61-7.53 (m, 2H), 7.42-7.40 (m, 1H);  $^{13}\text{C}$  NMR (101 MHz,  $\text{CDCl}_3$ ):  $\delta$  = 175.3, 159.8, 147.7, 144.3, 135.3, 135.2, 132.8, 131.3, 130.5, 128.3, 128.0, 127.5, 127.4, 125.5, 122.0; HRMS (ESI)  $m/z$  calcd for  $\text{C}_{15}\text{H}_8\text{ClN}_3\text{O}$   $[\text{M}+\text{H}]^+$  282.0429, found 282.0422.

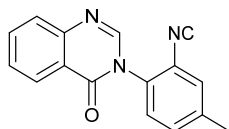

**3-(2-Isocyano-4-methylphenyl)quinazolin-4(3H)-one (1u)**, 480.8 mg, 46% yield), flash column chromatography on silica gel (petroleum ether/ethyl acetate 2/1) gave yellow solid;  $^1\text{H}$  NMR (400 MHz,  $\text{CDCl}_3$ ):  $\delta$  = 8.37-8.34 (m, 1H), 7.98 (s, 1H), 7.84-7.76 (m, 2H), 7.58-7.54 (m, 1H), 7.41-7.33 (m, 3H), 2.45 (s, 3H);  $^{13}\text{C}$  NMR (101 MHz,  $\text{CDCl}_3$ ):  $\delta$  = 169.7, 160.1, 147.8, 145.1, 141.5, 135.0, 131.4, 131.2, 128.8, 128.5, 128.0, 127.9, 127.3, 124.5, 122.2, 21.1; HRMS (ESI)  $m/z$  calcd for  $\text{C}_{16}\text{H}_{11}\text{N}_3\text{O}$   $[\text{M}+\text{H}]^+$  262.0975, found 262.0983.

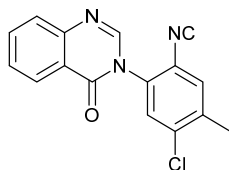

**3-(5-Chloro-2-isocyano-4-methylphenyl)quinazolin-4(3H)-one (1v)**, 508.7 mg, 43% yield), flash column chromatography on silica gel (petroleum ether/ethyl acetate 2/1) gave yellow solid;  $^1\text{H}$  NMR (400 MHz,  $\text{CDCl}_3$ ):  $\delta$  = 8.36-8.33 (m, 1H), 7.96 (s, 1H), 7.85-7.76 (m, 2H), 7.59-7.55 (m, 1H), 7.48 (d,  $J$  = 1.9 Hz, 2H), 2.45 (s, 3H);  $^{13}\text{C}$  NMR (101 MHz,  $\text{CDCl}_3$ ):  $\delta$  = 171.0, 159.9, 147.7, 144.5, 139.8, 136.3, 135.2, 132.1, 129.7, 128.2, 128.0, 127.6, 127.3, 123.1, 122.0, 20.0; HRMS (ESI)  $m/z$  calcd for  $\text{C}_{16}\text{H}_{10}\text{ClN}_3\text{O}$   $[\text{M}+\text{H}]^+$  296.0585, found 296.0595.

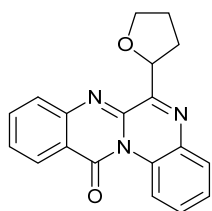

**6-(Tetrahydrofuran-2-yl)-12H-quinoxalino[2,1-*b*]quinazolin-12-one (3aa**, 45.7 mg, 72% yield), flash column chromatography on silica gel (petroleum ether/ethyl acetate 5/1) gave yellow solid;  $^1\text{H}$  NMR (400 MHz,  $\text{CDCl}_3$ ):  $\delta$  = 9.59-9.56 (m, 1H), 8.46-8.44 (m, 1H), 8.01-7.99 (m, 1H), 7.87-7.81 (m, 2H), 7.61-7.51 (m, 3H), 5.95-5.91 (m, 1H), 4.33-4.28 (m, 1H), 4.12-4.07 (m, 1H), 2.70-2.62 (m, 1H), 2.20-2.06 (m, 3H);  $^{13}\text{C}$  NMR (101 MHz,  $\text{CDCl}_3$ ):  $\delta$  = 161.9, 161.5, 145.4, 138.5, 135.0, 134.8, 130.2, 129.3, 128.1, 128.0, 127.9, 127.3, 127.2, 121.3, 120.4, 77.3, 69.4, 31.5, 25.7; HRMS (ESI)  $m/z$  calcd for  $\text{C}_{19}\text{H}_{15}\text{N}_3\text{O}_2$   $[\text{M}+\text{H}]^+$  318.1237, found 318.1224.

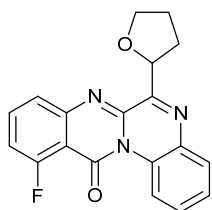

**11-Fluoro-6-(tetrahydrofuran-2-yl)-12H-quinoxalino[2,1-*b*]quinazolin-12-one (3ba**, 44.9 mg, 67% yield), flash column chromatography on silica gel (petroleum ether/ethyl acetate 5/1) gave yellow solid;  $^1\text{H}$  NMR (400 MHz,  $\text{CDCl}_3$ ):  $\delta$  = 9.41-9.39 (m, 1H), 7.99-7.97 (m, 1H), 7.78-7.73 (m, 1H), 7.65-7.62 (m, 1H), 7.57-7.50 (m, 2H), 7.24-7.19 (m, 1H), 5.89-5.85 (m, 1H), 4.30-4.24 (m, 1H), 4.10-4.05 (m, 1H), 2.65-2.58 (m, 1H), 2.20-2.05 (m, 3H);  $^{13}\text{C}$  NMR (101 MHz,  $\text{CDCl}_3$ ):  $\delta$  = 161.3 (d,  $J_{\text{C-F}}$  = 268.4 Hz), 161.1, 158.9 (d,  $J_{\text{C-F}}$  = 4.8 Hz), 147.4, 139.1, 135.1 (d,  $J_{\text{C-F}}$  = 10.5 Hz), 135.0, 130.2, 129.5, 127.5, 127.4, 123.9 (d,  $J_{\text{C-F}}$  = 4.4 Hz), 120.1, 114.2 (d,  $J_{\text{C-F}}$  = 20.9 Hz), 110.8 (d,  $J_{\text{C-F}}$  = 5.1 Hz), 77.2, 69.4, 31.4, 25.7; HRMS (ESI)  $m/z$  calcd for  $\text{C}_{19}\text{H}_{14}\text{FN}_3\text{O}_2$   $[\text{M}+\text{H}]^+$  336.1143, found 336.1143.

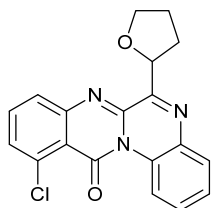

**11-Chloro-6-(tetrahydrofuran-2-yl)-12H-quinoxalino[2,1-*b*]quinazolin-12-one (3ca**, 52.1 mg, 74% yield), flash column chromatography on silica gel (petroleum ether/ethyl acetate 5/1) gave yellow solid;  $^1\text{H}$  NMR (400 MHz,  $\text{CDCl}_3$ ):  $\delta$  = 9.30-9.28 (m, 1H), 7.99-7.97 (m, 1H), 7.75-7.72 (m, 1H), 7.66 (t,  $J$  = 7.9 Hz, 1H), 7.56-7.51 (m, 3H), 5.88-5.85 (m, 1H), 4.31-4.25 (m, 1H), 4.10-4.05 (m, 1H), 2.65-2.57 (m, 1H), 2.20-2.05 (m, 3H);  $^{13}\text{C}$  NMR (101 MHz,  $\text{CDCl}_3$ ):  $\delta$  = 161.1, 159.8, 147.8, 138.9, 135.1, 134.3, 134.0, 130.4, 130.2, 129.4, 127.4, 127.3, 127.2, 120.0, 118.2, 77.1, 69.4, 31.4, 25.8; HRMS (ESI)  $m/z$  calcd for  $\text{C}_{19}\text{H}_{14}\text{ClN}_3\text{O}_2$   $[\text{M}+\text{H}]^+$

352.0847, found 352.0842.

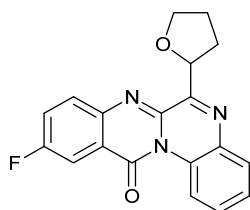

**10-Fluoro-6-(tetrahydrofuran-2-yl)-12H-quinoxalino[2,1-b]quinazolin-12-one (3da**, 41.6 mg, 62% yield), flash column chromatography on silica gel (petroleum ether/ethyl acetate 5/1) gave yellow solid;  $^1\text{H}$  NMR (400 MHz,  $\text{CDCl}_3$ ):  $\delta$  = 9.58-9.55 (m, 1H), 8.09-8.06 (m, 1H), 8.01-7.99 (m, 1H), 7.90-7.87 (m, 1H), 7.61-7.56 (m, 3H), 5.93-5.90 (m, 1H), 4.32-4.26 (m, 1H), 4.12-4.07 (m, 1H), 2.67-2.59 (m, 1H), 2.22-2.06 (m, 3H);  $^{13}\text{C}$  NMR (101 MHz,  $\text{CDCl}_3$ ):  $\delta$  = 161.6 (d,  $J_{\text{C-F}}$  = 251.8 Hz), 161.3, 161.2 (d,  $J_{\text{C-F}}$  = 3.8 Hz), 142.1 (d,  $J_{\text{C-F}}$  = 2.0 Hz), 137.9 (d,  $J_{\text{C-F}}$  = 2.2 Hz), 135.1, 130.6 (d,  $J_{\text{C-F}}$  = 8.2 Hz), 130.2, 129.4, 127.9, 127.5, 123.8 (d,  $J_{\text{C-F}}$  = 24.4 Hz), 122.5 (d,  $J_{\text{C-F}}$  = 8.8 Hz), 120.4, 112.1 (d,  $J_{\text{C-F}}$  = 24.2 Hz), 77.3, 69.4, 31.4, 25.8; HRMS (ESI)  $m/z$  calcd for  $\text{C}_{19}\text{H}_{14}\text{FN}_3\text{O}_2$   $[\text{M}+\text{H}]^+$  336.1143, found 336.1140.

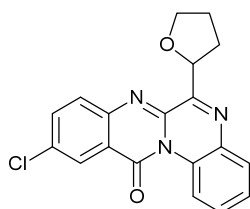

**10-Chloro-6-(tetrahydrofuran-2-yl)-12H-quinoxalino[2,1-b]quinazolin-12-one (3ea**, 47.8 mg, 68% yield), flash column chromatography on silica gel (petroleum ether/ethyl acetate 5/1) gave yellow solid;  $^1\text{H}$  NMR (400 MHz,  $\text{CDCl}_3$ ):  $\delta$  = 9.54-9.51 (m, 1H), 8.38-8.38 (m, 1H), 8.01-7.98 (m, 1H), 7.81-7.74 (m, 2H), 7.59-7.52 (m, 2H), 5.92-5.88 (m, 1H), 4.31-4.26 (m, 1H), 4.11-4.06 (m, 1H), 2.66-2.58 (m, 1H), 2.21-2.06 (m, 3H);  $^{13}\text{C}$  NMR (101 MHz,  $\text{CDCl}_3$ ):  $\delta$  = 161.3, 160.8, 143.9, 138.5, 135.3, 135.0, 133.9, 130.2, 129.7, 129.5, 127.9, 127.6, 126.6, 122.1, 120.3, 77.3, 69.4, 31.4, 25.8; HRMS (ESI)  $m/z$  calcd for  $\text{C}_{19}\text{H}_{14}\text{ClN}_3\text{O}_2$   $[\text{M}+\text{Na}]^+$  374.0667, found 374.0665.

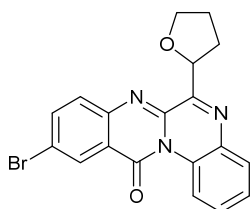

**10-Bromo-6-(tetrahydrofuran-2-yl)-12H-quinoxalino[2,1-b]quinazolin-12-one (3fa**, 58.6 mg, 74% yield), flash column chromatography on silica gel (petroleum ether/ethyl acetate 5/1) gave yellow solid;  $^1\text{H}$  NMR (400 MHz,  $\text{CDCl}_3$ ):  $\delta$  = 9.51-9.49 (m, 1H), 8.53 (d,  $J$  = 2.3 Hz, 1H), 7.99-7.97 (m, 1H), 7.89-7.87 (m, 1H), 7.70 (d,  $J$  = 8.7 Hz, 1H), 7.58-7.50 (m, 2H), 5.91-5.87 (m, 1H), 4.30-4.25 (m, 1H), 4.11-4.05 (m, 1H), 2.65-2.57 (m, 1H), 2.20-2.03 (m, 3H);  $^{13}\text{C}$  NMR (101 MHz,  $\text{CDCl}_3$ ):  $\delta$  = 161.3, 160.7, 144.2, 138.6, 138.0, 135.0, 130.2, 129.8,

129.7, 129.5, 127.9, 127.5, 122.4, 121.7, 120.3, 77.3, 69.4, 31.4, 25.8; HRMS (ESI)  $m/z$  calcd for  $C_{19}H_{14}BrN_3O_2$   $[M+H]^+$  396.0342, found 396.0328.

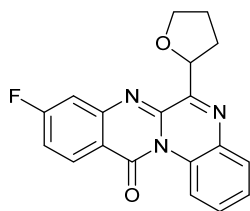

**9-Fluoro-6-(tetrahydrofuran-2-yl)-12H-quinoxalino[2,1-b]quinazolin-12-one (3ga**, 42.9 mg, 64% yield), flash column chromatography on silica gel (petroleum ether/ethyl acetate 5/1) gave yellow solid;  $^1H$  NMR (400 MHz,  $CDCl_3$ ):  $\delta$  = 9.55-9.53 (m, 1H), 8.47-8.43 (m, 1H), 8.02-7.99 (m, 1H), 7.59-7.52 (m, 2H), 7.50-7.47 (m, 1H), 7.33-7.28 (m, 1H), 5.91-5.88 (m, 1H), 4.32-4.26 (m, 1H), 4.12-4.06 (m, 1H), 2.67-2.59 (m, 1H), 2.20-2.06 (m, 3H);  $^{13}C$  NMR (101 MHz,  $CDCl_3$ ):  $\delta$  = 166.7 (d,  $J_{C-F}$  = 257.0 Hz), 161.2, 161.1, 147.5 (d,  $J_{C-F}$  = 13.4 Hz), 139.4, 135.0, 130.25, 130.23 (d,  $J_{C-F}$  = 10.8 Hz), 129.5, 127.9, 127.4, 120.3, 117.97 (d,  $J_{C-F}$  = 1.8 Hz), 117.0 (d,  $J_{C-F}$  = 23.9 Hz), 112.9 (d,  $J_{C-F}$  = 21.8 Hz), 77.3, 69.4, 31.5, 25.7; HRMS (ESI)  $m/z$  calcd for  $C_{19}H_{14}FN_3O_2$   $[M+H]^+$  336.1143, found 336.1142.

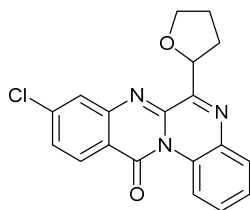

**9-Chloro-6-(tetrahydrofuran-2-yl)-12H-quinoxalino[2,1-b]quinazolin-12-one (3ha**, 49.3 mg, 70% yield), flash column chromatography on silica gel (petroleum ether/ethyl acetate 5/1) gave yellow solid;  $^1H$  NMR (400 MHz,  $CDCl_3$ ):  $\delta$  = 9.55-9.53 (m, 1H), 8.36 (d,  $J$  = 8.6 Hz, 1H), 8.02-8.00 (m, 1H), 7.86 (d,  $J$  = 2.0 Hz, 1H), 7.60-7.51 (m, 3H), 5.90-5.87 (m, 1H), 4.32-4.27 (m, 1H), 4.12-4.07 (m, 1H), 2.68-2.60 (m, 1H), 2.18-2.06 (m, 3H);  $^{13}C$  NMR (101 MHz,  $CDCl_3$ ):  $\delta$  = 161.4, 161.3, 146.3, 141.2, 139.3, 135.0, 130.3, 129.6, 128.9, 128.6, 127.9, 127.5, 127.3, 120.3, 119.6, 77.3, 69.4, 31.5, 25.7; HRMS (ESI)  $m/z$  calcd for  $C_{19}H_{14}ClN_3O_2$   $[M+H]^+$  352.0847, found 352.0852.

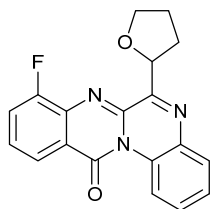

**8-Fluoro-6-(tetrahydrofuran-2-yl)-12H-quinoxalino[2,1-b]quinazolin-12-one (3ia**, 53.7 mg, 80% yield), flash column chromatography on silica gel (petroleum ether/ethyl acetate 5/1) gave yellow solid;  $^1H$  NMR (400 MHz,  $CDCl_3$ ):  $\delta$  = 9.54-9.51 (m, 1H), 8.22-8.19 (m, 1H), 8.03-8.00 (m, 1H), 7.59-7.49 (m, 4H), 5.91-5.88 (m, 1H), 4.33-4.27 (m, 1H), 4.11-4.06 (m, 1H), 2.76-2.69 (m, 1H), 2.17-2.07 (m, 3H);  $^{13}C$  NMR (101 MHz,  $CDCl_3$ ):  $\delta$  = 161.6, 161.0 (d,

$J_{C-F} = 3.2$  Hz), 157.3 (d,  $J_{C-F} = 259.9$  Hz), 138.5, 135.3, 135.1, 130.3, 129.5, 128.0 (d,  $J_{C-F} = 7.6$  Hz), 127.8, 127.6, 123.0, 122.8 (d,  $J_{C-F} = 4.6$  Hz), 120.3, 120.0 (d,  $J_{C-F} = 18.4$  Hz), 77.7, 69.4, 31.7, 25.8; HRMS (ESI)  $m/z$  calcd for  $C_{19}H_{14}FN_3O_2$   $[M+H]^+$  336.1143, found 336.1138.

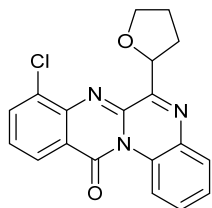

**8-Chloro-6-(tetrahydrofuran-2-yl)-12H-quinoxalino[2,1-*b*]quinazolin-12-one (3ja**, 51.4 mg, 73% yield), flash column chromatography on silica gel (petroleum ether/ethyl acetate 5/1) gave yellow solid;  $^1H$  NMR (400 MHz,  $CDCl_3$ ):  $\delta = 9.52$ -9.48 (m, 1H), 8.29-8.27 (m, 1H), 8.03-8.00 (m, 1H), 7.87-7.84 (m, 1H), 7.57-7.51 (m, 2H), 7.44 (t,  $J = 7.9$  Hz, 1H), 5.90-5.87 (m, 1H), 4.33-4.27 (m, 1H), 4.12-4.07 (m, 1H), 2.86-2.80 (m, 1H), 2.14-2.05 (m, 3H);  $^{13}C$  NMR (101 MHz,  $CDCl_3$ ):  $\delta = 161.8$ , 161.3, 142.1, 138.4, 135.1, 134.8, 132.6, 130.3, 129.5, 127.8, 127.7, 127.6, 126.0, 122.6, 120.2, 77.9, 69.4, 32.0, 25.8; HRMS (ESI)  $m/z$  calcd for  $C_{19}H_{14}ClN_3O_2$   $[M+H]^+$  352.0847, found 352.0854.

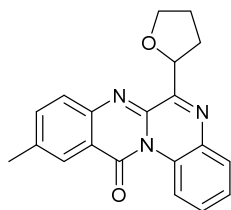

**10-Methyl-6-(tetrahydrofuran-2-yl)-12H-quinoxalino[2,1-*b*]quinazolin-12-one (3ka**, 45.1 mg, 68% yield), flash column chromatography on silica gel (petroleum ether/ethyl acetate 5/1) gave yellow solid;  $^1H$  NMR (400 MHz,  $CDCl_3$ ):  $\delta = 9.59$ -9.56 (m, 1H), 8.24-8.22 (m, 1H), 8.00-7.98 (m, 1H), 7.76-7.74 (m, 1H), 7.67-7.63 (m, 1H), 7.58-7.50 (m, 2H), 5.94-5.90 (m, 1H), 4.33-4.27 (m, 1H), 4.12-4.06 (m, 1H), 2.67-2.62 (m, 1H), 2.54 (s, 3H), 2.20-2.04 (m, 3H);  $^{13}C$  NMR (101 MHz,  $CDCl_3$ ):  $\delta = 161.9$ , 161.5, 143.4, 138.9, 137.9, 136.4, 135.0, 130.1, 129.2, 128.3, 127.9, 127.2, 126.6, 121.0, 120.4, 77.3, 69.4, 31.5, 25.7, 21.7; HRMS (ESI)  $m/z$  calcd for  $C_{20}H_{17}N_3O_2$   $[M+H]^+$  332.1394, found 332.1389.

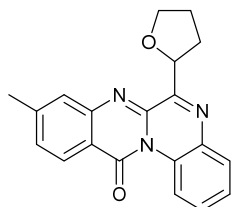

**9-Methyl-6-(tetrahydrofuran-2-yl)-12H-quinoxalino[2,1-*b*]quinazolin-12-one (3la**, 48.3 mg, 73% yield), flash column chromatography on silica gel (petroleum ether/ethyl acetate 5/1) gave yellow solid;  $^1H$  NMR (400 MHz,  $CDCl_3$ ):  $\delta = 9.59$ -9.56 (m, 1H), 8.31 (d,  $J = 8.2$  Hz, 1H), 8.00-7.97 (m, 1H), 7.63 (s, 1H), 7.57-7.49 (m, 2H), 7.39-7.37 (m, 1H), 5.92-5.89 (m, 1H), 4.33-4.27 (m, 1H), 4.12-4.06 (m, 1H), 2.69-2.61 (m, 1H), 2.52 (s, 3H), 2.17-2.07 (m,



3H);  $^{13}\text{C}$  NMR (101 MHz,  $\text{CDCl}_3$ ):  $\delta = 161.9, 161.5, 146.0, 145.5, 138.6, 135.0, 130.1, 129.7, 129.3, 128.3, 127.6, 127.1, 120.4, 118.9, 77.4, 69.4, 31.6, 25.7, 22.0$ ; HRMS (ESI)  $m/z$  calcd for  $\text{C}_{20}\text{H}_{17}\text{N}_3\text{O}_2$   $[\text{M}+\text{H}]^+$  332.1394, found 332.1384.

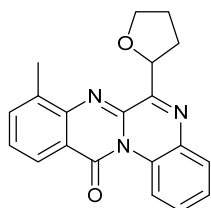

**8-Methyl-6-(tetrahydrofuran-2-yl)-12H-quinoxalino[2,1-b]quinazolin-12-one (3ma**, 45.1 mg, 68% yield), flash column chromatography on silica gel (petroleum ether/ethyl acetate 5/1) gave yellow solid;  $^1\text{H}$  NMR (400 MHz,  $\text{CDCl}_3$ ):  $\delta = 9.57\text{-}9.55$  (m, 1H), 8.23-8.21 (m, 1H), 8.00-7.98 (m, 1H), 7.63-7.60 (m, 1H), 7.54-7.50 (m, 2H), 7.41 (t,  $J = 7.7$  Hz, 1H), 5.92-5.89 (m, 1H), 4.34-4.29 (m, 1H), 4.11-4.06 (m, 1H), 2.73-2.67 (m, 1H), 2.65 (s, 3H), 2.14-2.03 (m, 3H);  $^{13}\text{C}$  NMR (101 MHz,  $\text{CDCl}_3$ ):  $\delta = 162.1, 161.9, 143.8, 137.2, 136.5, 135.1, 135.0, 130.1, 129.2, 128.1, 127.7, 127.2, 124.9, 121.2, 120.4, 77.6, 69.4, 32.0, 25.6, 17.3$ ; HRMS (ESI)  $m/z$  calcd for  $\text{C}_{20}\text{H}_{17}\text{N}_3\text{O}_2$   $[\text{M}+\text{H}]^+$  332.1394, found 332.1387.

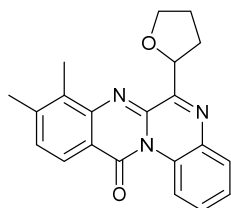

**8,9-Dimethyl-6-(tetrahydrofuran-2-yl)-12H-quinoxalino[2,1-b]quinazolin-12-one (3na**, 51.1 mg, 74% yield), flash column chromatography on silica gel (petroleum ether/ethyl acetate 5/1) gave yellow solid;  $^1\text{H}$  NMR (400 MHz,  $\text{CDCl}_3$ ):  $\delta = 9.61\text{-}9.58$  (m, 1H), 8.16 (d,  $J = 8.2$  Hz, 1H), 8.01-7.98 (m, 1H), 7.57-7.49 (m, 2H), 7.35 (d,  $J = 8.2$  Hz, 1H), 5.96-5.93 (m, 1H), 4.36-4.30 (m, 1H), 4.14-4.08 (m, 1H), 2.74-2.69 (m, 1H), 2.60 (s, 3H), 2.43 (s, 3H), 2.15-2.04 (m, 3H);  $^{13}\text{C}$  NMR (101 MHz,  $\text{CDCl}_3$ ):  $\delta = 162.2, 162.0, 143.9, 143.5, 137.2, 135.0, 134.4, 130.2, 130.1, 129.2, 128.2, 127.1, 124.1, 120.4, 119.2, 77.6, 69.4, 32.0, 25.6, 20.9, 13.1$ ; HRMS (ESI)  $m/z$  calcd for  $\text{C}_{21}\text{H}_{19}\text{N}_3\text{O}_2$   $[\text{M}+\text{H}]^+$  346.1550, found 346.1558.

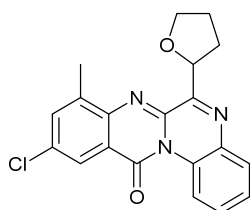

**10-Chloro-8-methyl-6-(tetrahydrofuran-2-yl)-12H-quinoxalino[2,1-b]quinazolin-12-one (3oa**, 52.0 mg, 71% yield), flash column chromatography on silica gel (petroleum ether/ethyl acetate 5/1) gave yellow solid;  $^1\text{H}$  NMR (400 MHz,  $\text{CDCl}_3$ ):  $\delta = 9.52\text{-}9.50$  (m, 1H), 8.16 (d,  $J = 2.3$  Hz, 1H), 8.00-7.97 (m, 1H), 7.58 (d,  $J = 2.4$  Hz, 1H), 7.54-7.51 (m, 2H), 5.92-5.88 (m, 1H), 4.33-4.28 (m, 1H), 4.12-4.06 (m, 1H), 2.72-2.67 (m, 1H), 2.64 (s, 3H), 2.14-2.06 (m,

3H);  $^{13}\text{C}$  NMR (101 MHz,  $\text{CDCl}_3$ ):  $\delta$  = 161.7, 161.0, 142.5, 138.8, 137.4, 135.3, 135.1, 133.4, 130.2, 129.4, 127.8, 127.5, 124.1, 122.0, 120.3, 77.4, 69.4, 31.9, 25.7, 17.2; HRMS (ESI)  $m/z$  calcd for  $\text{C}_{20}\text{H}_{16}\text{ClN}_3\text{O}_2$   $[\text{M}+\text{H}]^+$  366.1004, found 366.1004.

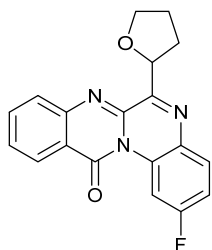

**2-Fluoro-6-(tetrahydrofuran-2-yl)-12H-quinoxalino[2,1-b]quinazolin-12-one (3pa**, 49.0 mg, 73% yield), flash column chromatography on silica gel (petroleum ether/ethyl acetate 5/1) gave yellow solid;  $^1\text{H}$  NMR (400 MHz,  $\text{CDCl}_3$ ):  $\delta$  = 9.44-9.40 (m, 1H), 8.43-8.40 (m, 1H), 7.99-7.95 (m, 1H), 7.84 (d,  $J$  = 3.9 Hz, 2H), 7.61-7.57 (m, 1H), 7.27-7.23 (m, 1H), 5.92-5.88 (m, 1H), 4.31-4.26 (m, 1H), 4.12-4.06 (m, 1H), 2.69-2.61 (m, 1H), 2.21-2.04 (m, 3H);  $^{13}\text{C}$  NMR (101 MHz,  $\text{CDCl}_3$ ):  $\delta$  = 161.9 (d,  $J_{\text{C-F}}$  = 248.9 Hz), 161.8, 160.6, 145.3, 138.0, 135.0, 131.7, 131.4 (d,  $J_{\text{C-F}}$  = 9.9 Hz), 128.9 (d,  $J_{\text{C-F}}$  = 12.5 Hz), 128.2, 128.1, 127.3, 120.9, 114.8 (d,  $J_{\text{C-F}}$  = 23.2 Hz), 108.1 (d,  $J_{\text{C-F}}$  = 32.0 Hz), 77.3, 69.4, 31.5, 25.7; HRMS (ESI)  $m/z$  calcd for  $\text{C}_{19}\text{H}_{14}\text{FN}_3\text{O}_2$   $[\text{M}+\text{H}]^+$  336.1143, found 336.1138.

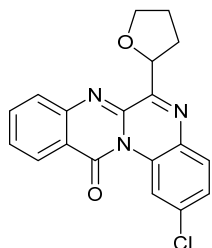

**2-Chloro-6-(tetrahydrofuran-2-yl)-12H-quinoxalino[2,1-b]quinazolin-12-one (3qa**, 49.3 mg, 78% yield), flash column chromatography on silica gel (petroleum ether/ethyl acetate 5/1) gave yellow solid;  $^1\text{H}$  NMR (400 MHz,  $\text{CDCl}_3$ ):  $\delta$  = 9.68 (d,  $J$  = 2.2 Hz, 1H), 8.44-8.42 (m, 1H), 7.91 (d,  $J$  = 8.5 Hz, 1H), 7.87-7.85 (m, 2H), 7.63-7.59 (m, 1H), 7.51-7.48 (m, 1H), 5.92-5.89 (m, 1H), 4.31-4.26 (m, 1H), 4.12-4.06 (m, 1H), 2.70-2.62 (m, 1H), 2.16-2.6 (m, 3H);  $^{13}\text{C}$  NMR (101 MHz,  $\text{CDCl}_3$ ):  $\delta$  = 161.78, 161.77, 145.2, 138.0, 135.09, 135.06, 133.6, 130.9, 128.6, 128.3, 128.1, 127.6, 127.4, 121.1, 120.5, 77.3, 69.4, 31.6, 25.8; HRMS (ESI)  $m/z$  calcd for  $\text{C}_{19}\text{H}_{14}\text{ClN}_3\text{O}_2$   $[\text{M}+\text{H}]^+$  352.0847, found 352.0841.

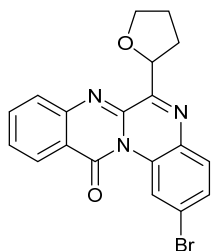

**2-Bromo-6-(tetrahydrofuran-2-yl)-12H-quinoxalino[2,1-b]quinazolin-12-one (3ra**, 60.2

mg, 76% yield), flash column chromatography on silica gel (petroleum ether/ethyl acetate 5/1) gave yellow solid;  $^1\text{H}$  NMR (400 MHz,  $\text{CDCl}_3$ ):  $\delta$  = 9.85 (t,  $J$  = 1.9 Hz, 1H), 8.47-8.44 (m, 1H), 7.88-7.84 (m, 3H), 7.67-7.61 (m, 2H), 5.93-7.89 (m, 1H), 4.31-4.26 (m, 1H), 4.12-4.07 (m, 1H), 2.70-2.63 (m, 1H), 2.20-2.06 (m, 3H);  $^{13}\text{C}$  NMR (101 MHz,  $\text{CDCl}_3$ ):  $\delta$  = 162.0, 161.8, 145.3, 138.0, 135.1, 134.0, 131.1, 130.6, 128.8, 128.4, 128.2, 127.4, 123.4, 123.3, 121.1, 77.3, 69.5, 31.6, 25.8; HRMS (ESI)  $m/z$  calcd for  $\text{C}_{19}\text{H}_{14}\text{BrN}_3\text{O}_2$   $[\text{M}+\text{Na}]^+$  418.0162, found 418.0168.

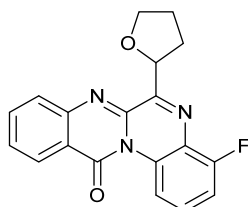

**4-Fluoro-6-(tetrahydrofuran-2-yl)-12H-quinoxalino[2,1-b]quinazolin-12-one (3sa**, 40.2 mg, 60% yield), flash column chromatography on silica gel (petroleum ether/ethyl acetate 5/1) gave yellow solid;  $^1\text{H}$  NMR (400 MHz,  $\text{CDCl}_3$ ):  $\delta$  = 9.37-9.34 (m, 1H), 8.45-8.42 (m, 1H), 7.89-7.84 (m, 2H), 7.63-7.59 (m, 1H), 7.54-7.48 (m, 1H), 7.31-7.28 (m, 1H), 6.00-5.96 (m, 1H), 4.33-4.27 (m, 1H), 4.13-4.08 (m, 1H), 2.62-2.53 (m, 1H), 2.32-2.24 (m, 1H), 2.19-2.06 (m, 2H);  $^{13}\text{C}$  NMR (100 MHz,  $\text{CDCl}_3$ ):  $\delta$  = 161.88 (d,  $J_{\text{C-F}}$  = 2.1 Hz), 161.81, 157.8 (d,  $J_{\text{C-F}}$  = 256.9 Hz), 145.3, 138.2, 135.0, 129.4 (d,  $J_{\text{C-F}}$  = 8.9 Hz), 129.3, 128.3, 128.2, 127.4, 125.1 (d,  $J_{\text{C-F}}$  = 12.8 Hz), 121.3, 116.0 (d,  $J_{\text{C-F}}$  = 4.3 Hz), 113.8 (d,  $J_{\text{C-F}}$  = 19.3 Hz), 77.3, 69.4, 31.1, 25.8; HRMS (ESI)  $m/z$  calcd for  $\text{C}_{19}\text{H}_{14}\text{FN}_3\text{O}_2$   $[\text{M}+\text{H}]^+$  336.1143, found 336.1140.

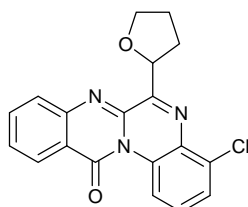

**4-Chloro-6-(tetrahydrofuran-2-yl)-12H-quinoxalino[2,1-b]quinazolin-12-one (3ta**, 50.0 mg, 71% yield), flash column chromatography on silica gel (petroleum ether/ethyl acetate 5/1) gave yellow solid;  $^1\text{H}$  NMR (400 MHz,  $\text{CDCl}_3$ ):  $\delta$  = 9.48-9.45 (m, 1H), 8.43-8.40 (m, 1H), 7.89-7.83 (m, 2H), 7.62-7.57 (m, 2H), 7.47-7.43 (m, 1H), 6.08-6.05 (m, 1H), 4.37-4.31 (m, 1H), 4.15-4.09 (m, 1H), 2.54-2.45 (m, 1H), 2.40-2.32 (m, 1H), 2.27-2.17 (m, 1H), 2.14-2.06 (m, 1H);  $^{13}\text{C}$  NMR (101 MHz,  $\text{CDCl}_3$ ):  $\delta$  = 162.2, 161.9, 145.4, 138.1, 135.0, 134.5, 131.9, 129.6, 129.1, 128.3, 128.2, 128.1, 127.4, 121.2, 119.0, 76.8, 69.4, 30.7, 25.5; HRMS (ESI)  $m/z$  calcd for  $\text{C}_{19}\text{H}_{14}\text{ClN}_3\text{O}_2$   $[\text{M}+\text{H}]^+$  352.0847, found 352.0845.

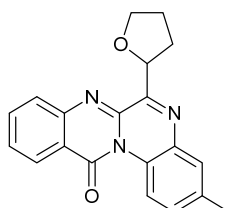

**3-Methyl-6-(tetrahydrofuran-2-yl)-12*H*-quinoxalino[2,1-*b*]quinazolin-12-one (3ua**, 47.1 mg, 71% yield), flash column chromatography on silica gel (petroleum ether/ethyl acetate 5/1) gave yellow solid; <sup>1</sup>H NMR (400 MHz, CDCl<sub>3</sub>): δ = 9.46-9.43 (m, 1H), 8.43-8.40 (m, 1H), 7.84-7.78 (m, 3H), 7.58-7.53 (m, 1H), 7.36-7.33 (m, 1H), 5.94-5.90 (m, 1H), 4.31-4.26 (m, 1H), 4.11-4.06 (m, 1H), 2.68-2.59 (m, 1H), 2.46 (s, 3H), 2.19-2.05 (m, 3H); <sup>13</sup>C NMR (101 MHz, CDCl<sub>3</sub>): δ = 161.8, 161.3, 145.4, 138.5, 137.3, 134.9, 134.6, 130.3, 130.1, 128.0, 127.8, 127.2, 125.8, 121.2, 120.1, 77.3, 69.4, 31.5, 25.8, 20.8; HRMS (ESI) m/z calcd for C<sub>20</sub>H<sub>17</sub>N<sub>3</sub>O<sub>2</sub> [M+H]<sup>+</sup> 332.1394, found 332.1391.

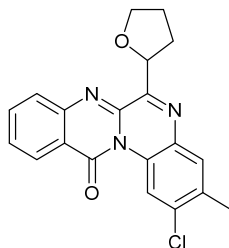

**2-Chloro-3-methyl-6-(tetrahydrofuran-2-yl)-12*H*-quinoxalino[2,1-*b*]quinazolin-12-one (3va**, 57.8 mg, 79% yield), flash column chromatography on silica gel (petroleum ether/ethyl acetate 5/1) gave yellow solid; <sup>1</sup>H NMR (400 MHz, CDCl<sub>3</sub>): δ = 9.65 (s, 1H), 8.41-8.35 (m, 1H), 7.83-7.81 (m, 3H), 7.60-7.54 (m, 1H), 5.91-5.87 (m, 1H), 4.30-4.25 (m, 1H), 4.11-4.05 (m, 1H), 2.69-2.60 (m, 1H), 2.45 (s, 3H), 2.17-2.06 (m, 3H); <sup>13</sup>C NMR (101 MHz, CDCl<sub>3</sub>): δ = 161.6, 145.3, 138.0, 135.5, 135.4, 134.9, 133.6, 131.3, 128.1, 128.0, 127.3, 126.4, 121.0, 120.7, 77.3, 69.4, 31.5, 25.8, 19.8; HRMS (ESI) m/z calcd for C<sub>20</sub>H<sub>16</sub>ClN<sub>3</sub>O<sub>2</sub> [M+H]<sup>+</sup> 366.1004, found 366.1010.

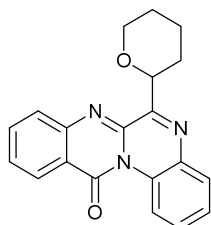

**6-(Tetrahydro-2*H*-pyran-2-yl)-12*H*-quinoxalino[2,1-*b*]quinazolin-12-one (3ab**, 42.4 mg, 64% yield), flash column chromatography on silica gel (petroleum ether/ethyl acetate 5/1) gave yellow solid; <sup>1</sup>H NMR (400 MHz, CDCl<sub>3</sub>): δ = 9.57-9.55 (m, 1H), 8.46-8.44 (m, 1H), 8.11-8.09 (m, 1H), 7.87-7.82 (m, 2H), 7.62-7.51 (m, 3H), 5.58-5.55 (m, 1H), 4.37-4.32 (m, 1H), 3.84-3.77 (m, 1H), 2.29-2.25 (m, 1H), 2.06-1.99 (m, 1H), 1.94-1.86 (m, 2H), 1.80-1.62 (m, 3H); <sup>13</sup>C NMR (101 MHz, CDCl<sub>3</sub>): δ = 161.9, 160.7, 145.3, 138.0, 135.1, 134.8, 130.2, 129.4, 127.98, 127.93, 127.90, 127.3, 127.2, 121.2, 120.3, 76.4, 69.6, 31.0, 25.7, 23.9; HRMS (ESI) m/z calcd for C<sub>20</sub>H<sub>17</sub>N<sub>3</sub>O<sub>2</sub> [M+H]<sup>+</sup> 332.1394, found 332.1389.

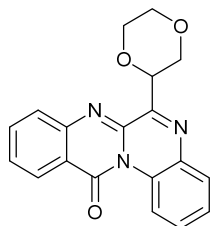

**6-(1,4-Dioxan-2-yl)-12H-quinoxalino[2,1-*b*]quinazolin-12-one (3ac)**, 38.7 mg, 58% yield), flash column chromatography on silica gel (petroleum ether/ethyl acetate 5/1) gave yellow solid;  $^1\text{H}$  NMR (400 MHz,  $\text{CDCl}_3$ ):  $\delta$  = 9.58-9.55 (m, 1H), 8.45-8.43 (m, 1H), 8.09-8.07 (m, 1H), 7.88-7.83 (m, 2H), 7.62-7.52 (m, 3H), 5.87-5.84 (m, 1H), 4.48-4.45 (m, 1H), 4.21-4.17 (m, 1H), 4.12-4.06 (m, 1H), 3.95-3.86 (m, 2H), 3.75-3.70 (m, 1H);  $^{13}\text{C}$  NMR (101 MHz,  $\text{CDCl}_3$ ):  $\delta$  = 161.8, 157.1, 145.2, 138.1, 135.0, 134.9, 130.3, 130.0, 128.3, 128.0, 127.4, 127.3, 121.2, 120.4, 74.9, 70.4, 67.7, 66.5; HRMS (ESI)  $m/z$  calcd for  $\text{C}_{19}\text{H}_{15}\text{N}_3\text{O}_3$   $[\text{M}+\text{H}]^+$  334.1186, found 334.1192.

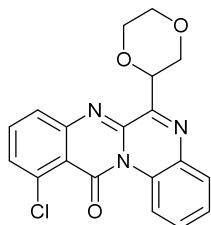

**11-Chloro-6-(1,4-dioxan-2-yl)-12H-quinoxalino[2,1-*b*]quinazolin-12-one (3cc)**, 44.1 mg, 60% yield), flash column chromatography on silica gel (petroleum ether/ethyl acetate 5/1) gave yellow solid;  $^1\text{H}$  NMR (400 MHz,  $\text{CDCl}_3$ ):  $\delta$  = 9.32-9.30 (m, 1H), 8.10-8.07 (m, 1H), 7.80-7.77 (m, 1H), 7.72 (t,  $J$  = 7.9 Hz, 1H), 7.61-7.53 (m, 3H), 5.82-5.79 (m, 1H), 4.44-4.41 (m, 1H), 4.20-4.16 (m, 1H), 4.11-4.05 (m, 1H), 3.95-3.86 (m, 2H), 3.75-3.70 (m, 1H);  $^{13}\text{C}$  NMR (101 MHz,  $\text{CDCl}_3$ ):  $\delta$  = 159.6, 156.7, 147.7, 138.5, 135.0, 134.4, 134.3, 130.7, 130.5, 130.1, 127.6, 127.2, 120.0, 118.2, 74.7, 70.3, 67.7, 66.4; HRMS (ESI)  $m/z$  calcd for  $\text{C}_{19}\text{H}_{14}\text{ClN}_3\text{O}_3$   $[\text{M}+\text{H}]^+$  368.0796, found 368.0813.

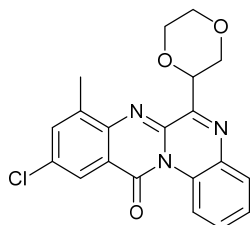

**10-Chloro-6-(1,4-dioxan-2-yl)-8-methyl-12H-quinoxalino[2,1-*b*]quinazolin-12-one (3oc)**, 44.3 mg, 58% yield), flash column chromatography on silica gel (petroleum ether/ethyl acetate 5/1) gave yellow solid;  $^1\text{H}$  NMR (400 MHz,  $\text{CDCl}_3$ ):  $\delta$  = 9.56-9.53 (m, 1H), 8.22 (d,  $J$  = 2.4 Hz, 1H), 8.09-8.07 (m, 1H), 7.64-7.54 (m, 3H), 5.80-5.77 (m, 1H), 4.47-4.44 (m, 1H), 4.21-4.17 (m, 1H), 4.11-4.05 (m, 1H), 3.95-3.87 (m, 2H), 3.80-3.75 (m, 1H), 2.70 (s, 3H);  $^{13}\text{C}$

NMR (101 MHz, CDCl<sub>3</sub>):  $\delta$  = 161.0, 157.0, 142.3, 138.9, 137.1, 135.6, 135.0, 133.7, 130.4, 130.1, 127.8, 127.7, 124.2, 122.1, 120.4, 75.1, 70.4, 67.7, 66.5, 17.3; HRMS (ESI) *m/z* calcd for C<sub>20</sub>H<sub>16</sub>ClN<sub>3</sub>O<sub>3</sub> [M+H]<sup>+</sup> 382.0953, found 382.0945.

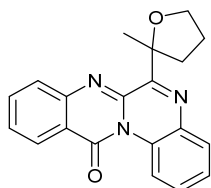

**6-(2-Methyltetrahydrofuran-2-yl)-12H-quinoxalino[2,1-*b*]quinazolin-12-one (3ad**, 45.1 mg, 68% yield), flash column chromatography on silica gel (petroleum ether/ethyl acetate 5/1) gave yellow solid; <sup>1</sup>H NMR (400 MHz, CDCl<sub>3</sub>):  $\delta$  = 9.53-9.50 (m, 1H), 8.47-8.45 (m, 1H), 8.06-8.03 (m, 1H), 7.88-7.84 (m, 2H), 7.63-7.50 (m, 3H), 4.18-4.07 (m, 2H), 2.79-2.71 (m, 1H), 2.49-2.42 (m, 1H), 2.14-2.04 (m, 1H), 1.95 (s, 3H), 1.92-1.87 (m, 1H); <sup>13</sup>C NMR (101 MHz, CDCl<sub>3</sub>):  $\delta$  = 163.4, 162.1, 144.9, 137.7, 134.8, 134.7, 130.4, 129.3, 128.1, 128.0, 127.8, 127.3, 127.2, 121.1, 120.1, 86.1, 67.7, 37.9, 26.6, 25.6; HRMS (ESI) *m/z* calcd for C<sub>20</sub>H<sub>17</sub>N<sub>3</sub>O<sub>2</sub> [M+H]<sup>+</sup> 332.1394, found 332.1386.

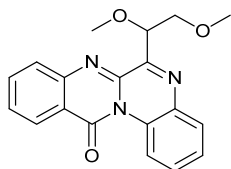

**6-(1,2-Dimethoxyethyl)-12H-quinoxalino[2,1-*b*]quinazolin-12-one (3ae**, 23.5 mg, 35% yield), flash column chromatography on silica gel (petroleum ether/ethyl acetate 5/1) gave yellow solid; <sup>1</sup>H NMR (400 MHz, CDCl<sub>3</sub>):  $\delta$  = 9.62-9.60 (m, 1H), 8.50-8.47 (m, 1H), 8.09-8.06 (m, 1H), 7.91-7.86 (m, 2H), 7.66-7.55 (m, 3H), 5.76 (t, *J* = 5.0 Hz, 1H), 3.94 (d, *J* = 5.0 Hz, 2H), 3.58 (s, 3H), 3.47 (s, 3H); <sup>13</sup>C NMR (101 MHz, CDCl<sub>3</sub>):  $\delta$  = 162.0, 158.2, 145.4, 138.9, 135.1, 135.0, 130.4, 129.8, 128.2, 128.1, 128.0, 127.4, 121.3, 120.4, 78.4, 74.4, 59.5, 58.4; HRMS (ESI) *m/z* calcd for C<sub>19</sub>H<sub>17</sub>N<sub>3</sub>O<sub>2</sub> [M+H]<sup>+</sup> 336.1343, found 336.1355.

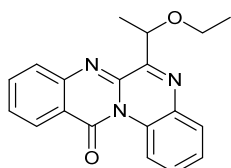

**6-(1-Ethoxyethyl)-12H-quinoxalino[2,1-*b*]quinazolin-12-one (3af**, 19.2 mg, 30% yield), flash column chromatography on silica gel (petroleum ether/ethyl acetate 5/1) gave yellow solid; <sup>1</sup>H NMR (400 MHz, CDCl<sub>3</sub>):  $\delta$  = 9.58-9.56 (m, 1H), 8.46-8.44 (m, 1H), 8.05-8.03 (m, 1H), 7.87-7.82 (m, 2H), 7.61-7.52 (m, 3H), 5.73-5.68 (m, 1H), 3.75-3.59 (m, 2H), 1.66 (d, *J* = 6.5 Hz, 3H), 1.30 (t, *J* = 7.0 Hz, 3H); <sup>13</sup>C NMR (101 MHz, CDCl<sub>3</sub>):  $\delta$  = 162.1, 162.0, 145.4, 138.7, 135.2, 134.8, 130.2, 129.4, 128.1, 128.0, 127.9, 127.4, 127.3, 121.2, 120.4, 73.2, 65.3, 20.3, 15.6; HRMS (ESI) *m/z* calcd for C<sub>19</sub>H<sub>15</sub>N<sub>3</sub>O<sub>2</sub> [M+Na]<sup>+</sup> 320.1394, found 320.1386.

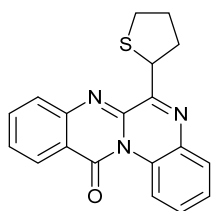

**6-(Tetrahydrothiophen-2-yl)-12H-quinoxalino[2,1-b]quinazolin-12-one (3ag)**, 34.0 mg, 51% yield), flash column chromatography on silica gel (petroleum ether/ethyl acetate 5/1) gave yellow solid;  $^1\text{H}$  NMR (400 MHz,  $\text{CDCl}_3$ ):  $\delta$  = 9.58-9.56 (m, 1H), 8.46-8.43 (m, 1H), 7.92-7.83 (m, 3H), 7.61-7.49 (m, 3H), 5.43-5.40 (m, 1H), 2.99-2.90 (m, 3H), 2.52-2.42 (m, 1H), 2.31-2.14 (m, 2H);  $^{13}\text{C}$  NMR (101 MHz,  $\text{CDCl}_3$ ):  $\delta$  = 162.1, 161.6, 145.3, 139.2, 135.0, 134.8, 129.8, 129.1, 128.2, 128.1, 127.9, 127.3, 127.2, 121.2, 120.5, 47.8, 33.2, 32.1, 31.3; HRMS (ESI)  $m/z$  calcd for  $\text{C}_{19}\text{H}_{15}\text{N}_3\text{OS}$   $[\text{M}+\text{H}]^+$  334.1009, found 334.1019.

## 5. References

1. A. Banerjee, P. Subramanian and K. P. Kaliappan, *J. Org. Chem.*, 2016, **81**, 10424.
2. V. A. Mamedov, V. L. Mamedova, V. V. Syakaev, D. E. Korshin, G. Z. Khikmatova, E. V. Mironova, O. B. Bazanova, I. Kh. Rizvanov and S. K. Latypov, *Tetrahedron.*, 2017, **73**, 5082.
3. Y. Liu, X.-L. Chen, X.-Y. Li, S.-S. Zhu, S.-J. Li, Y. Song, L.-B. Qu and B. Yu, *J. Am. Chem. Soc.*, 2021, **143**, 964.

## 6. Copies of the $^1\text{H}$ NMR and $^{13}\text{C}$ NMR Spectra

8.3660  
8.3612  
8.3462  
8.3414  
7.9934  
7.8469  
7.8090  
7.7898  
7.7657  
7.6198  
7.5944  
7.5839  
7.5601  
7.5409  
7.4910  
7.4863  
7.4737  
7.4668

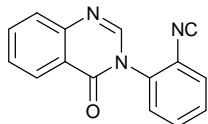

$^1\text{H}$  NMR (400M,  $\text{CDCl}_3$ ) of **1a**

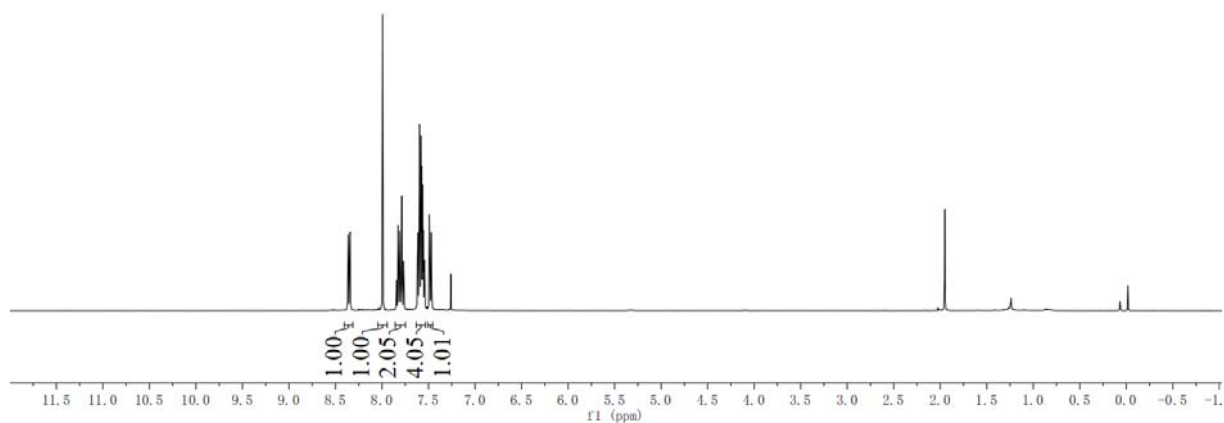

170.30  
159.99  
147.77  
144.85  
135.10  
133.81  
130.71  
130.69  
129.25  
128.15  
128.09  
127.89  
127.29  
124.89  
122.11  
77.46  
77.14  
76.82

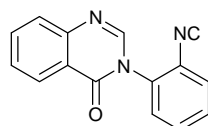

$^{13}\text{C}$  NMR (101M,  $\text{CDCl}_3$ ) of **1a**

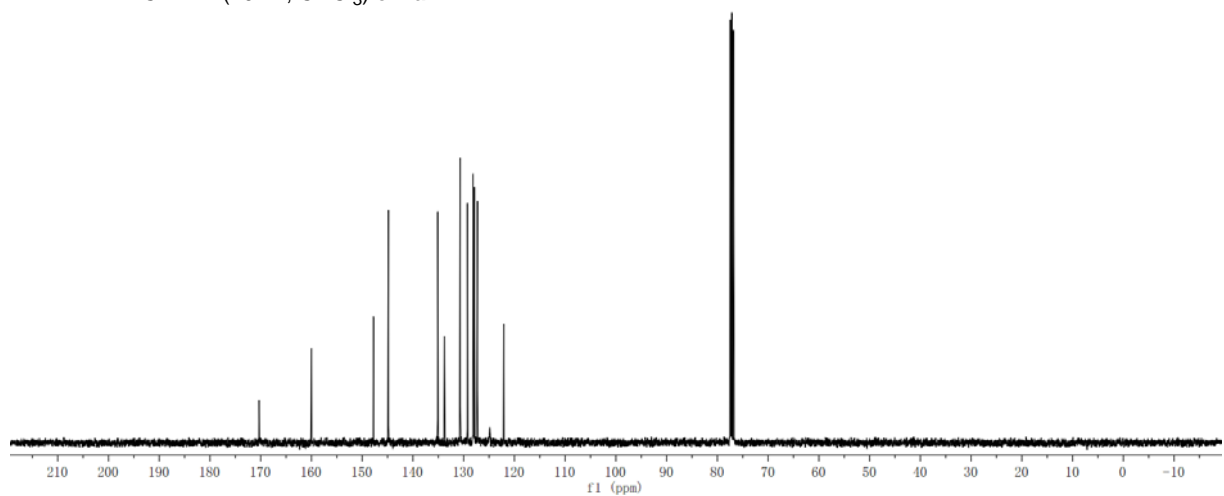



7.9722  
7.7923  
7.7718  
7.7512  
7.7379  
7.6310  
7.6053  
7.5811  
7.5722  
7.4948  
7.4867  
7.4789  
7.4708  
7.2431  
7.2404  
7.1964  
7.1936

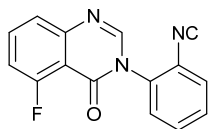

$^1\text{H}$  NMR (400M,  $\text{CDCl}_3$ ) of **1b**

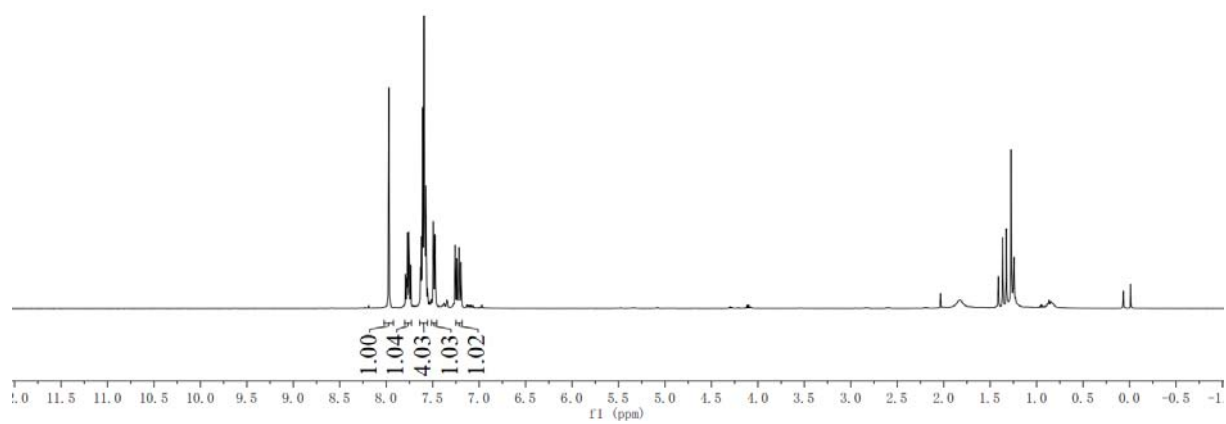

170.487  
162.917  
160.257  
156.968  
156.927  
149.753  
145.735  
135.661  
135.557  
133.363  
130.826  
130.690  
129.389  
128.123  
123.885  
123.843  
114.986  
114.780  
111.885  
111.824  
77.406  
77.088  
76.771

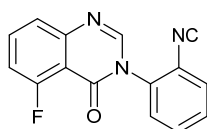

$^{13}\text{C}$  NMR (101M,  $\text{CDCl}_3$ ) of **1b**

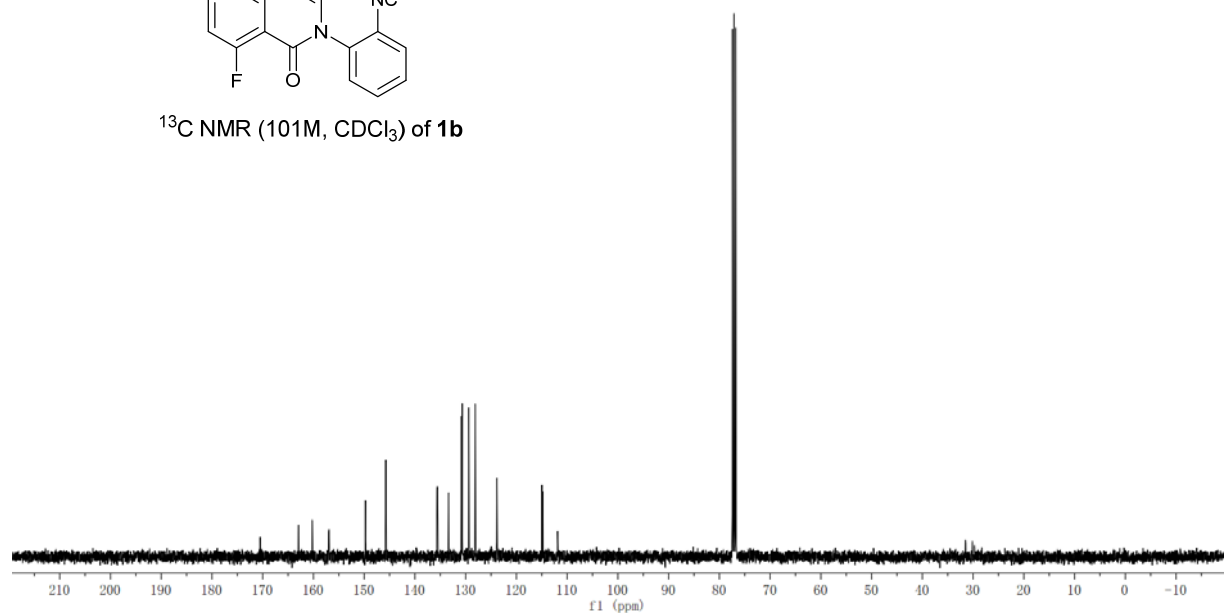

7.9800  
7.6804  
7.6761  
7.6711  
7.6668  
7.6101  
7.5805  
7.5587  
7.5363  
7.4971  
7.4912  
7.4780

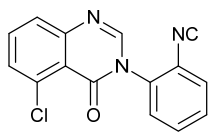

$^1\text{H}$  NMR (400M,  $\text{CDCl}_3$ ) of **1c**

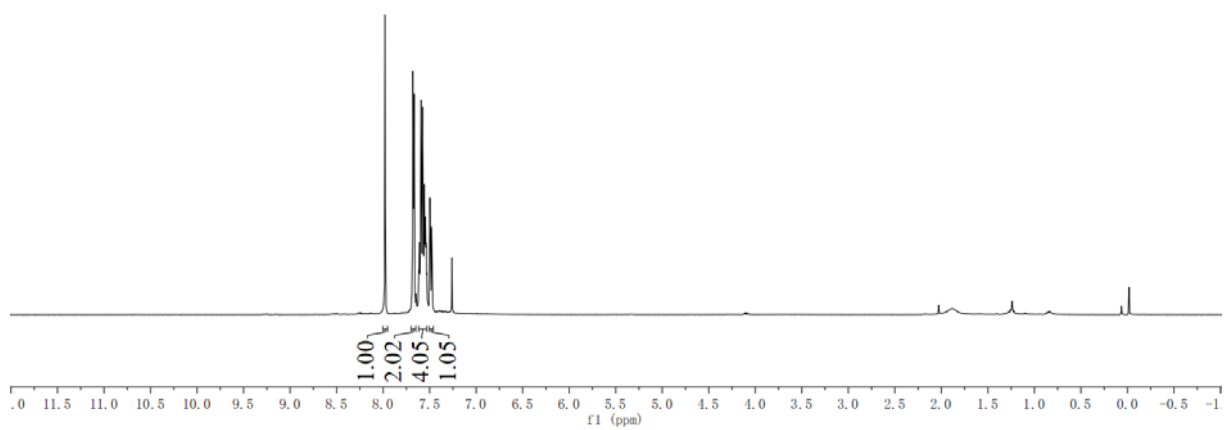

170.44  
158.14  
150.19  
145.50  
134.92  
134.52  
133.53  
130.88  
130.80  
130.68  
129.42  
128.08  
127.22  
124.89  
119.44  
77.44  
77.13  
76.81

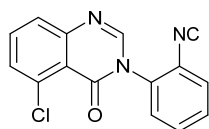

$^{13}\text{C}$  NMR (101M,  $\text{CDCl}_3$ ) of **1c**

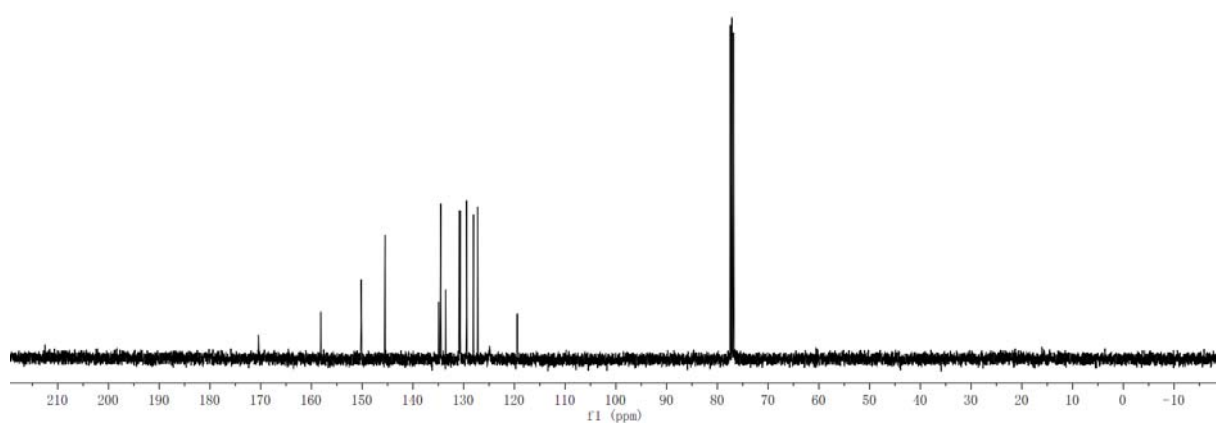

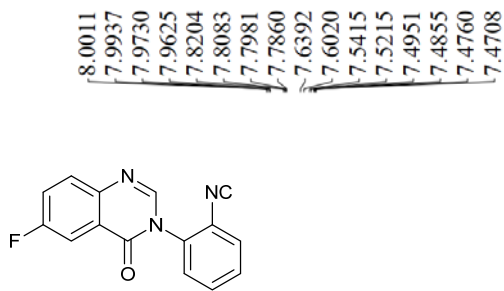

$^1\text{H}$  NMR (400M,  $\text{CDCl}_3$ ) of **1d**

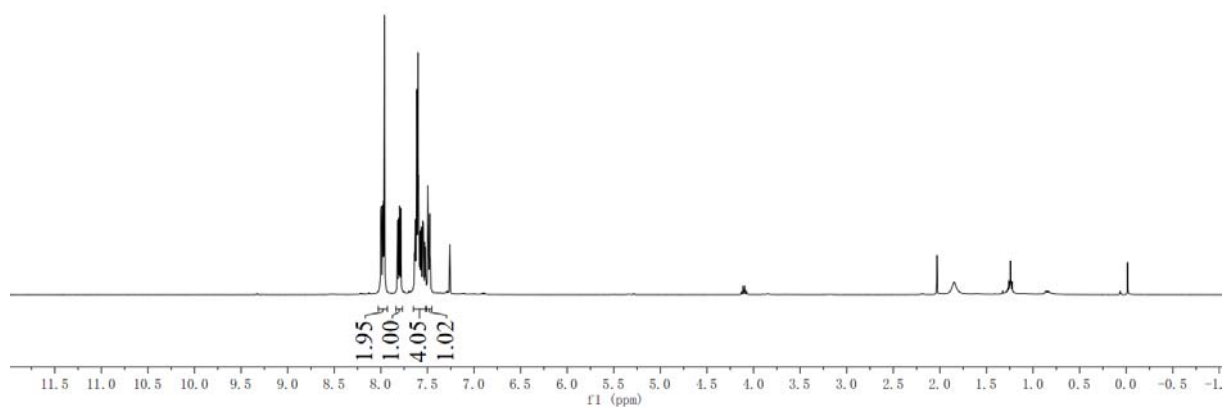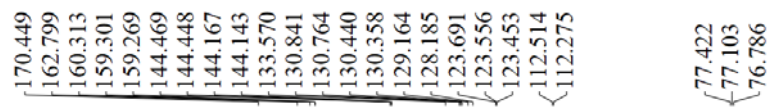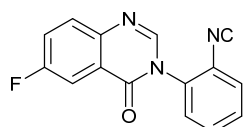

$^{13}\text{C}$  NMR (101M,  $\text{CDCl}_3$ ) of **1d**

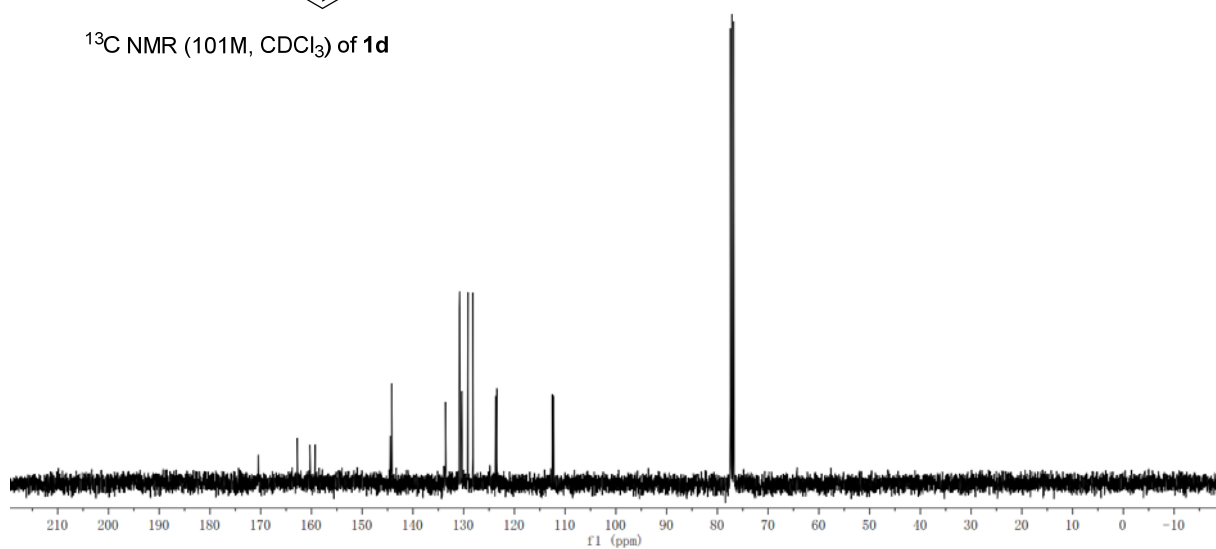

8.3104  
8.3087  
8.3048  
8.3031  
7.9813  
7.7756  
7.7539  
7.7482  
7.7166  
7.6316  
7.5998  
7.5889  
7.5784  
7.4917  
7.4865  
7.4719  
7.4674

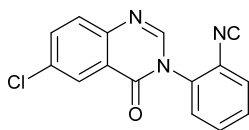

$^1\text{H}$  NMR (400M,  $\text{CDCl}_3$ ) of **1e**

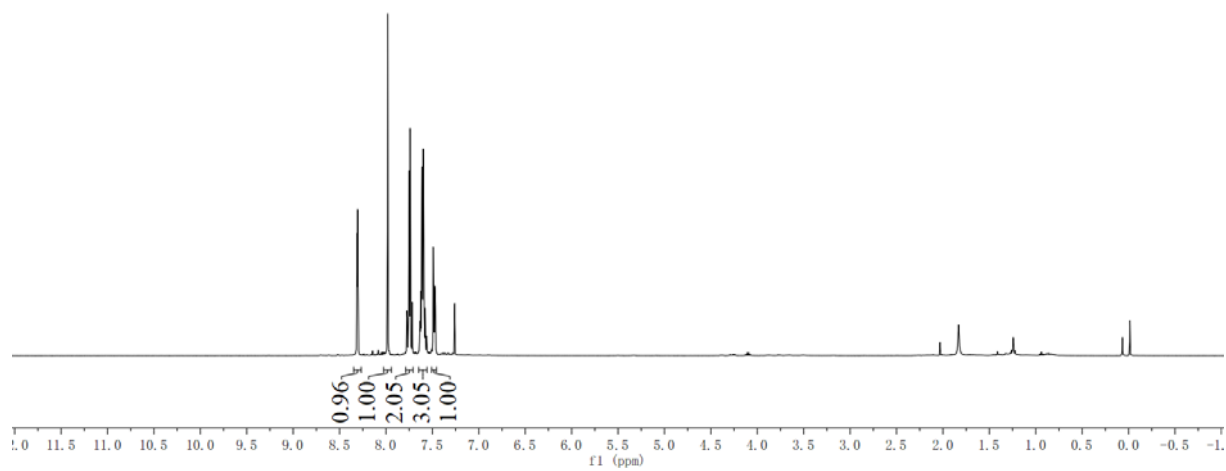

170.53  
158.97  
146.28  
145.03  
135.48  
134.01  
133.50  
130.88  
130.78  
129.57  
129.13  
128.19  
126.66  
124.83  
123.18  
77.43  
77.11  
76.80

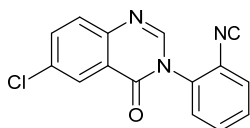

$^{13}\text{C}$  NMR (101M,  $\text{CDCl}_3$ ) of **1e**

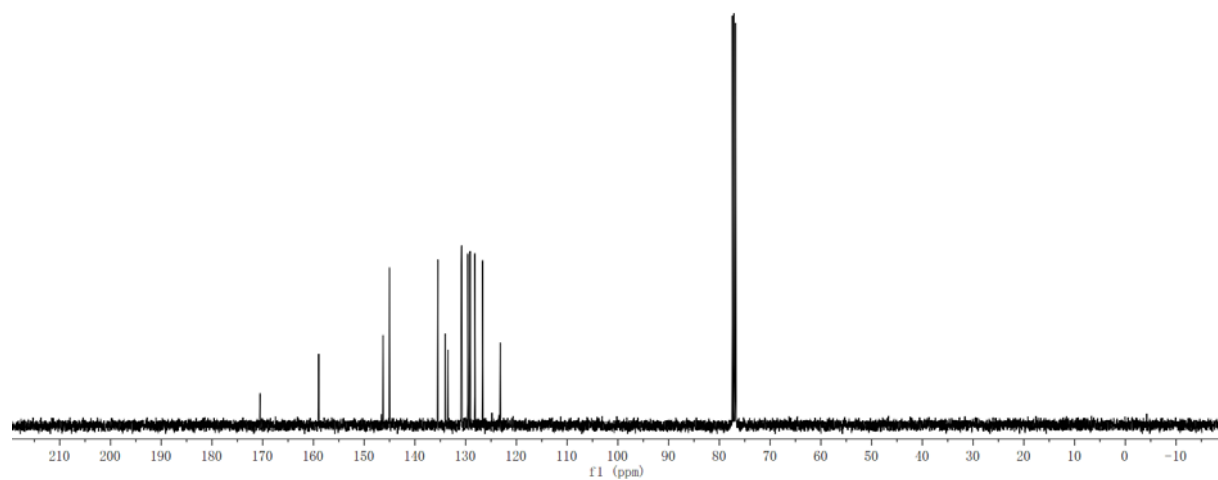

8.4602  
8.4545  
7.9913  
7.9138  
7.9080  
7.8923  
7.8865  
7.6681  
7.6466  
7.6216  
7.5753  
7.4902  
7.4808  
7.4706  
7.4656

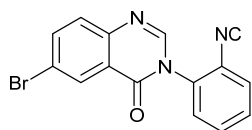

$^1\text{H}$  NMR (400M,  $\text{CDCl}_3$ ) of **1f**

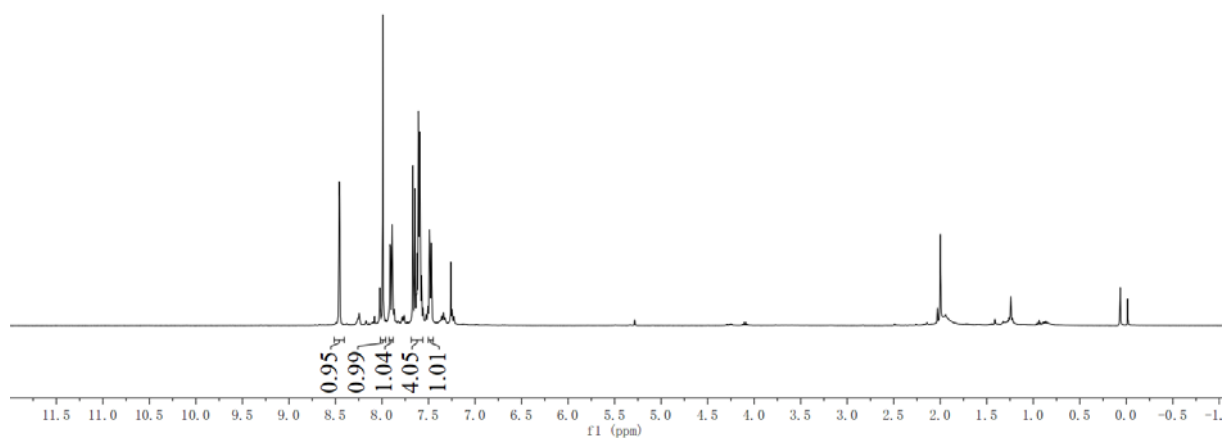

-170.54  
-158.82  
-146.61  
-145.18  
-138.28  
-133.48  
-130.88  
-130.79  
-129.81  
-129.68  
-129.13  
-128.19  
-127.16  
-123.45  
-121.82  
77.43  
77.11  
76.79

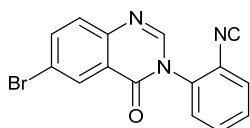

$^{13}\text{C}$  NMR (101M,  $\text{CDCl}_3$ ) of **1f**

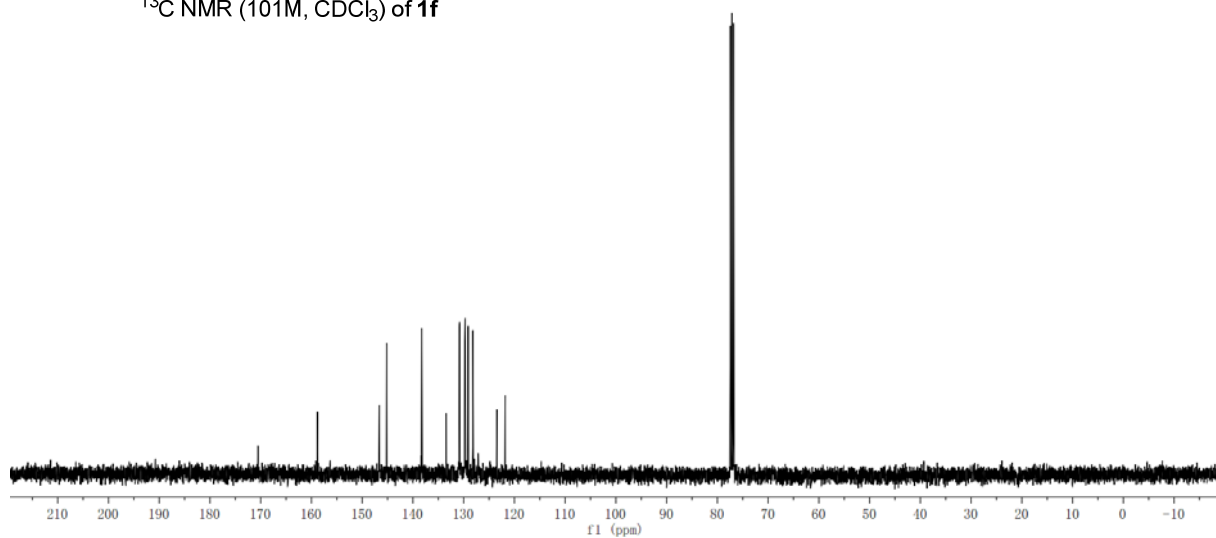

8.4047  
8.3897  
8.3826  
8.3676  
8.0228  
7.6498  
7.6232  
7.6126  
7.5905  
7.5076  
7.4834  
7.4616  
7.4319  
7.3212  
7.3149  
7.2935  
7.2723

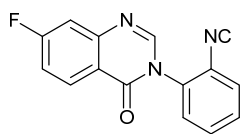

$^1\text{H}$  NMR (400M,  $\text{CDCl}_3$ ) of **1g**

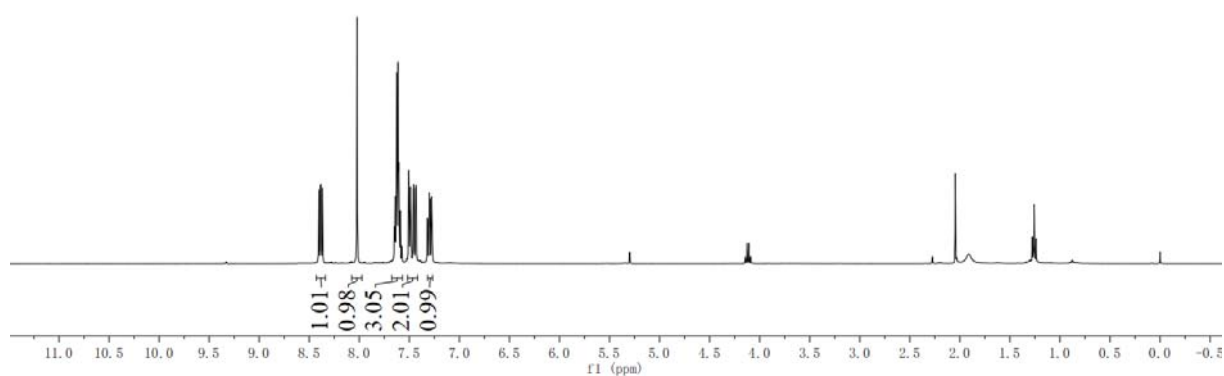

170.432  
168.075  
165.531  
159.231  
150.081  
149.953  
146.101  
133.537  
130.831  
130.748  
130.177  
130.070  
129.182  
128.169  
118.835  
118.813  
116.906  
116.672  
113.615  
113.394  
77.429  
77.110  
76.792

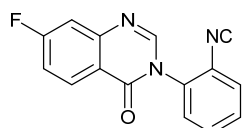

$^{13}\text{C}$  NMR (101M,  $\text{CDCl}_3$ ) of **1g**

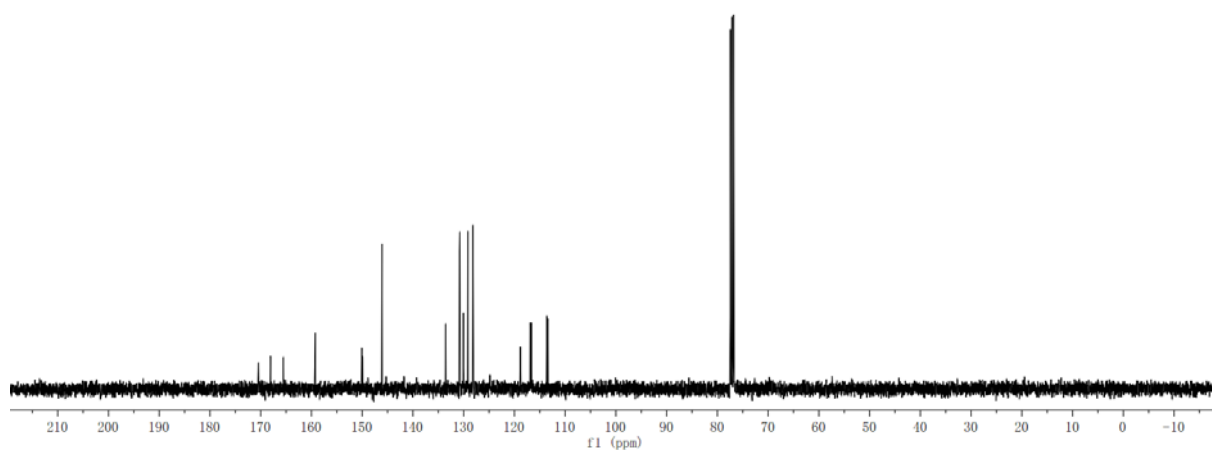

8.2899  
8.2686  
8.0000  
7.7729  
7.7680  
7.6327  
7.6087  
7.5959  
7.5743  
7.5286  
7.5072  
7.4912  
7.4640

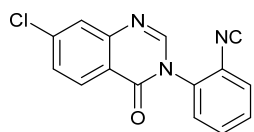

$^1\text{H}$  NMR (400M,  $\text{CDCl}_3$ ) of **1h**

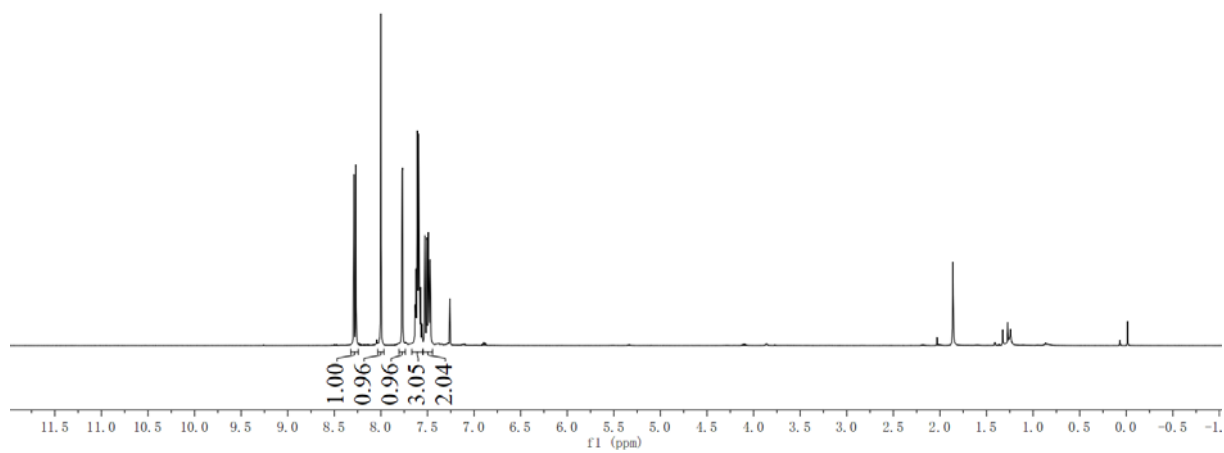

170.49  
159.36  
148.74  
146.06  
141.37  
133.49  
130.86  
130.77  
129.15  
128.76  
128.69  
128.18  
127.52  
124.84  
120.57  
77.44  
77.12  
76.81

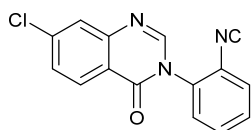

$^{13}\text{C}$  NMR (101M,  $\text{CDCl}_3$ ) of **1h**

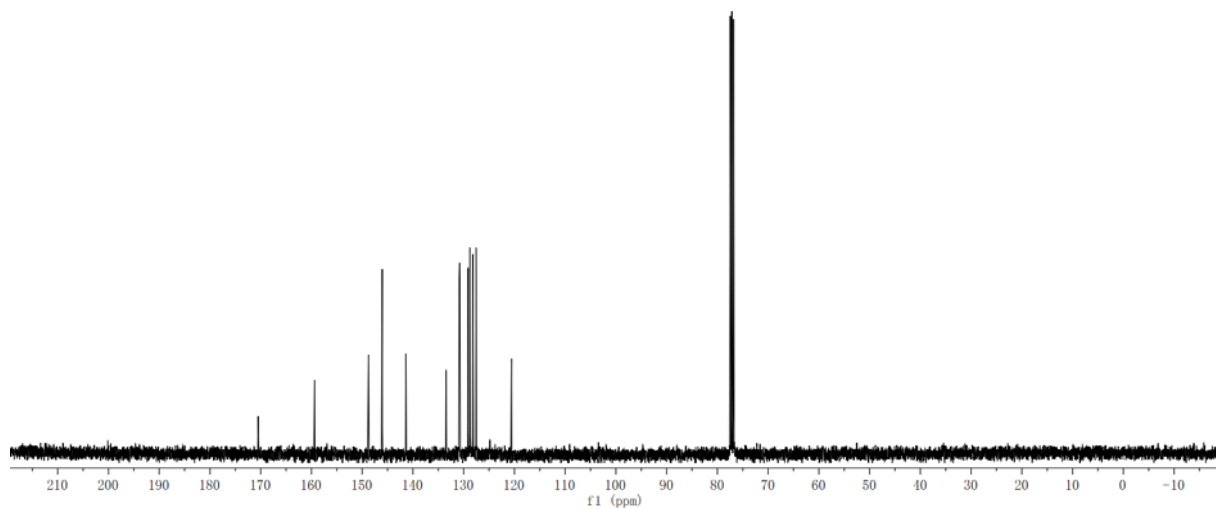

8.1494  
8.1411  
8.1317  
8.1242  
8.0318  
7.6422  
7.6045  
7.5385  
7.4785

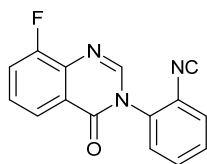

<sup>1</sup>H NMR (400M, CDCl<sub>3</sub>) of 1i

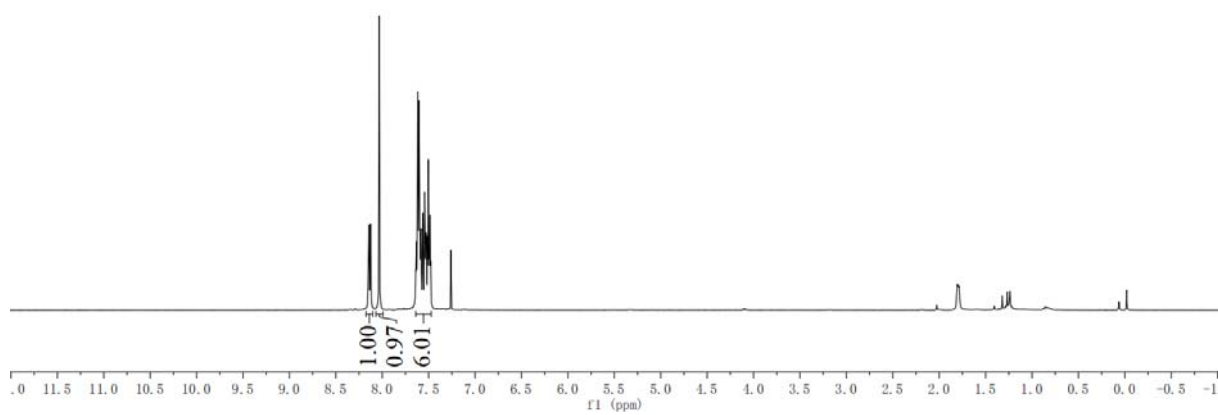

170.561  
159.047  
159.016  
158.451  
155.898  
145.386  
137.160  
137.039  
133.471  
130.922  
130.801  
129.137  
128.427  
128.350  
128.199  
123.900  
122.851  
122.808  
120.861  
120.673  
77.434  
77.117  
76.798

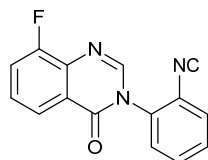

<sup>13</sup>C NMR (101M, CDCl<sub>3</sub>) of 1i

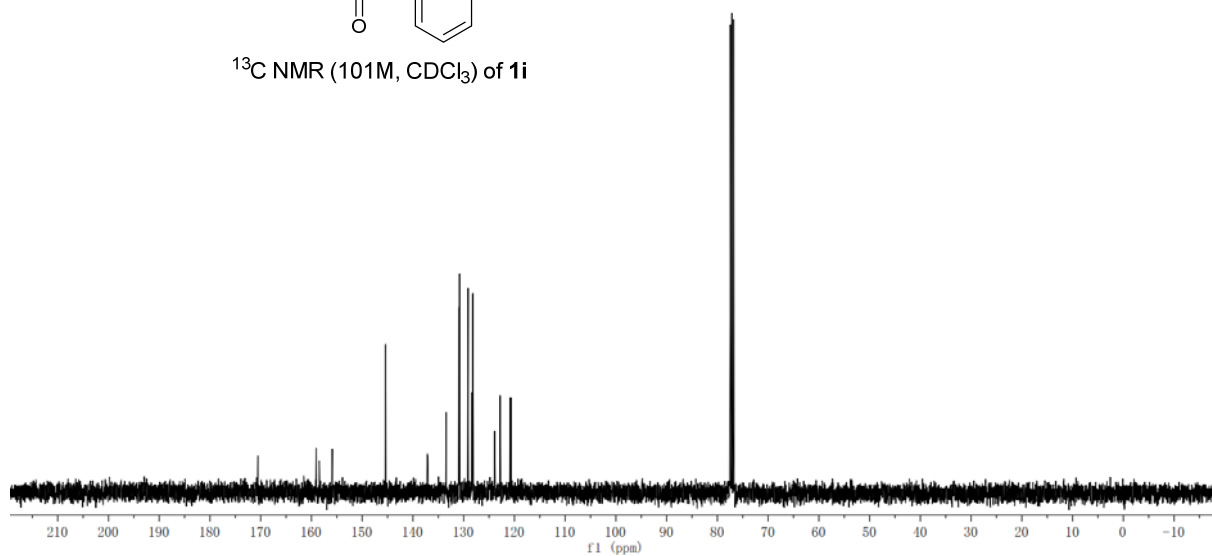



8.2770  
8.2734  
8.2570  
8.2534  
8.1034  
7.9103  
7.9067  
7.8907  
7.8871  
7.6380  
7.6150  
7.6006  
7.5618  
7.5070  
7.4926  
7.4872  
7.4677

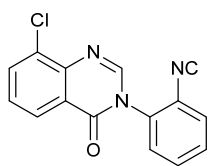

<sup>1</sup>H NMR (400M, CDCl<sub>3</sub>) of **1j**

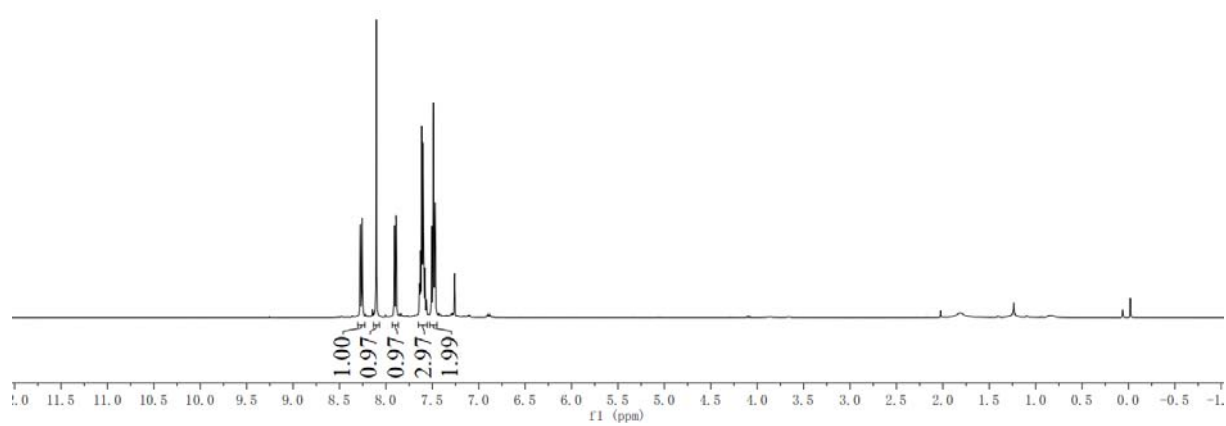

170.62  
159.35  
145.57  
144.47  
135.44  
133.41  
132.24  
130.95  
130.83  
129.08  
128.26  
128.23  
126.16  
124.84  
123.71  
77.44  
77.13  
76.81

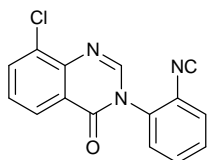

<sup>13</sup>C NMR (101M, CDCl<sub>3</sub>) of **1j**

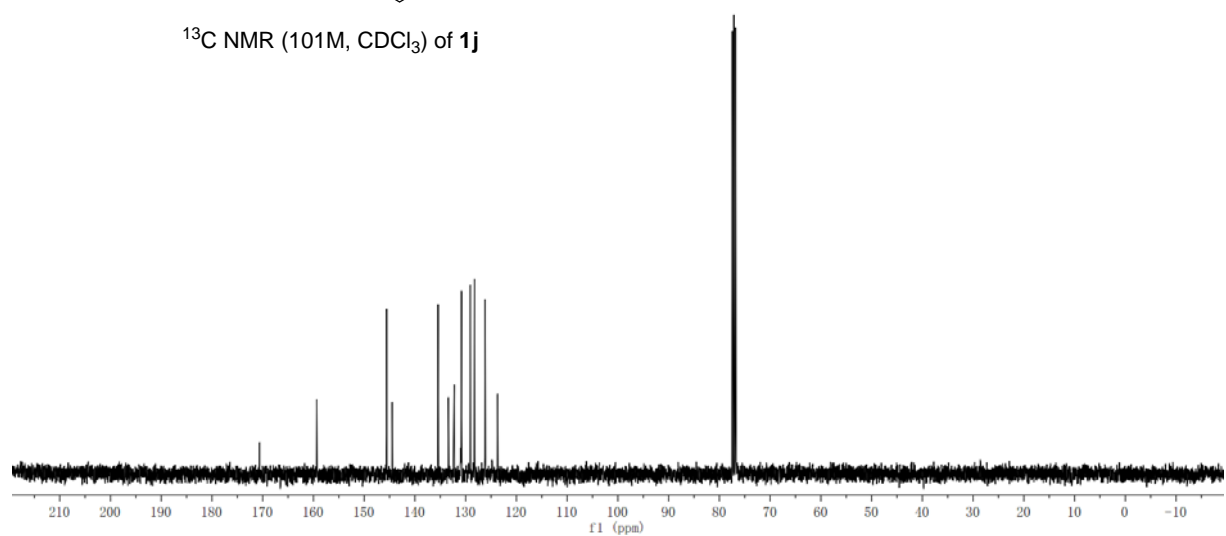

8.1384  
7.9362  
7.6844  
7.6638  
7.5916  
7.5293  
7.4831  
7.4747  
7.4643  
7.4587

-2.5004

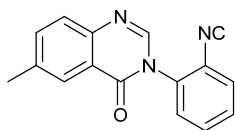

$^1\text{H}$  NMR (400M,  $\text{CDCl}_3$ ) of **1k**

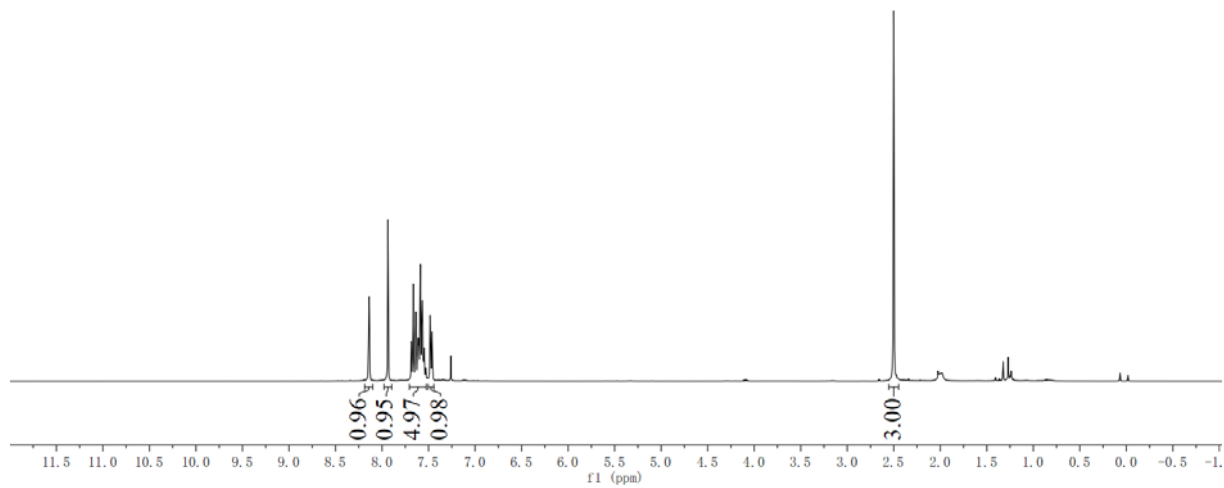

-170.23  
-149.91  
-145.93  
-144.05  
-138.46  
-136.46  
-133.98  
-130.68  
-130.59  
-129.24  
-128.11  
-127.67  
-126.74  
-124.92  
-121.81  
77.46  
77.14  
76.82

-21.43

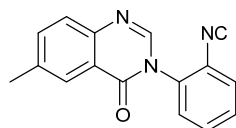

$^{13}\text{C}$  NMR (101M,  $\text{CDCl}_3$ ) of **1k**

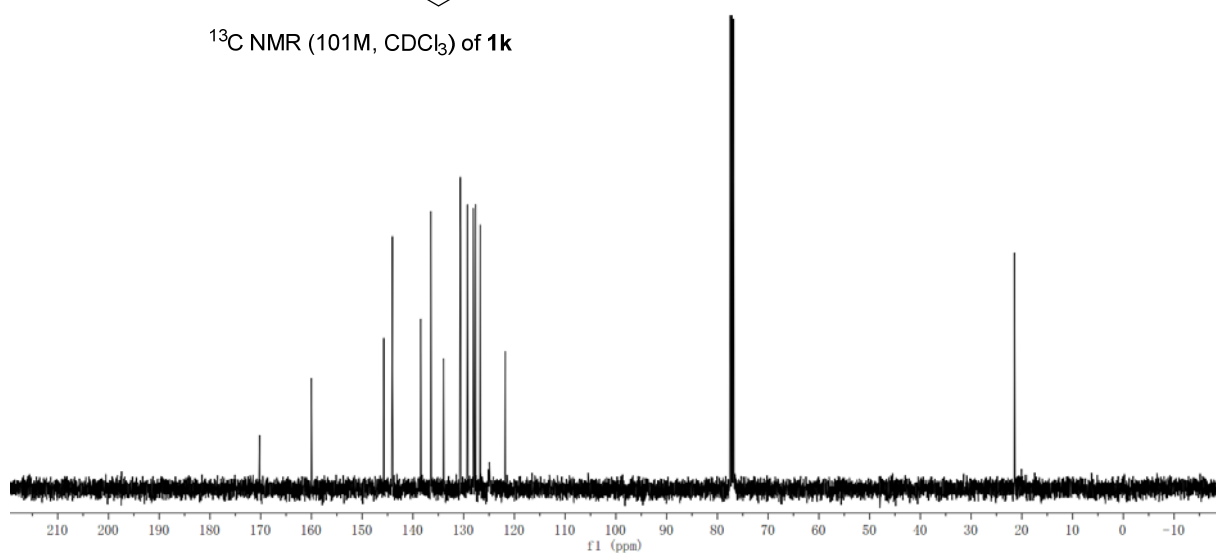

8.2488  
8.2285  
7.9671  
7.6168  
7.5945  
7.5703  
7.5360  
7.4876  
7.4824  
7.4685  
7.3917  
7.3715

-2.5349

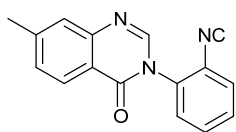

$^1\text{H}$  NMR (400M,  $\text{CDCl}_3$ ) of **11**

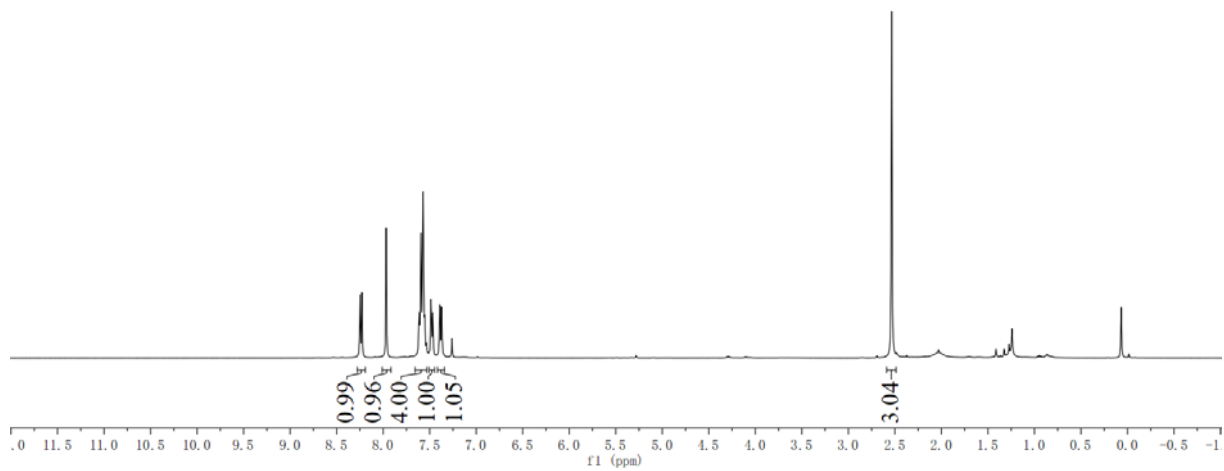

-170.21  
-159.95  
-147.87  
-146.32  
-144.92  
-133.91  
-130.66  
-130.60  
-129.58  
-129.29  
-128.13  
-127.67  
-127.12  
-124.96  
-119.64  
-77.44  
-77.12  
-76.80

-22.04

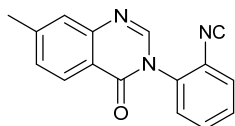

$^{13}\text{C}$  NMR (101M,  $\text{CDCl}_3$ ) of **11**

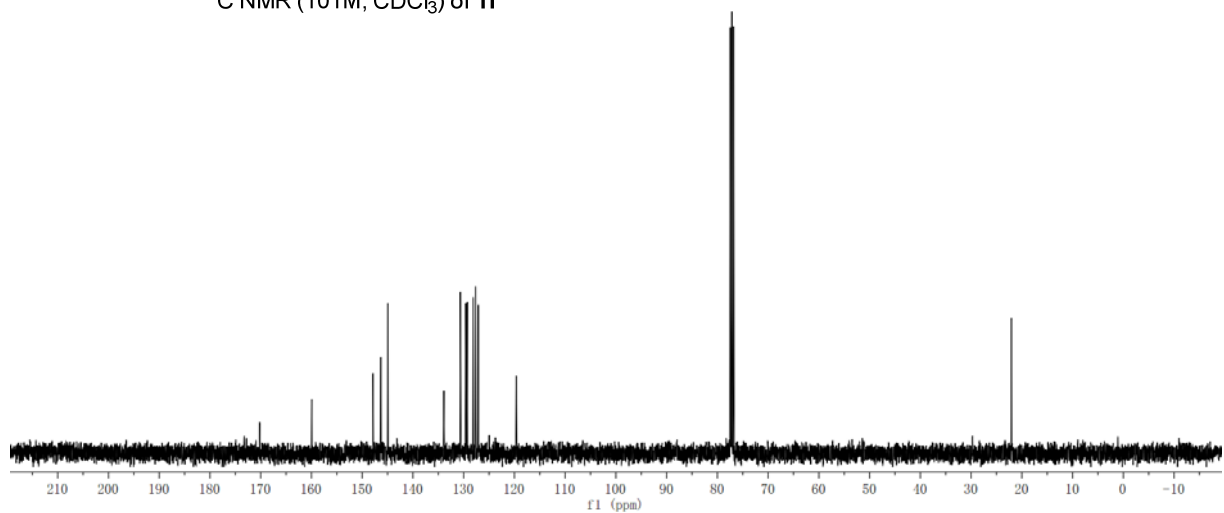

8.2166  
8.2128  
8.1965  
8.1927  
8.0072  
7.6761  
7.6577  
7.6186  
7.5965  
7.5710  
7.5338  
7.4878  
7.4621  
7.4427  
7.4236

-2.6514

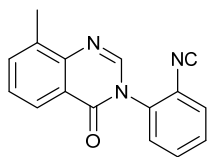

$^1\text{H}$  NMR (400M,  $\text{CDCl}_3$ ) of **1m**

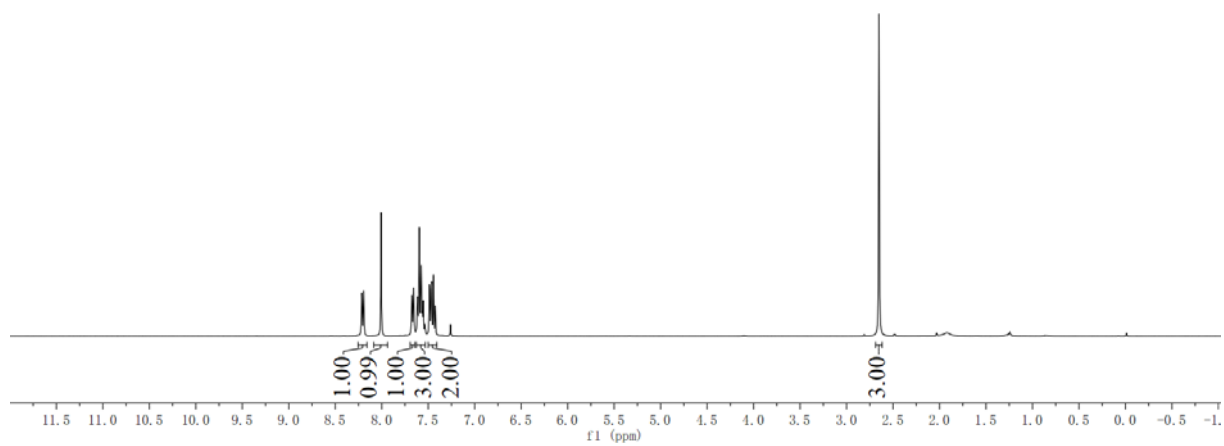

-170.17  
160.38  
146.34  
143.57  
136.42  
135.84  
133.95  
130.70  
130.61  
129.27  
128.14  
127.64  
124.96  
123.80  
122.11  
77.47  
77.15  
76.83

-17.59

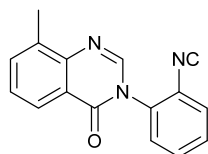

$^{13}\text{C}$  NMR (101M,  $\text{CDCl}_3$ ) of **1m**

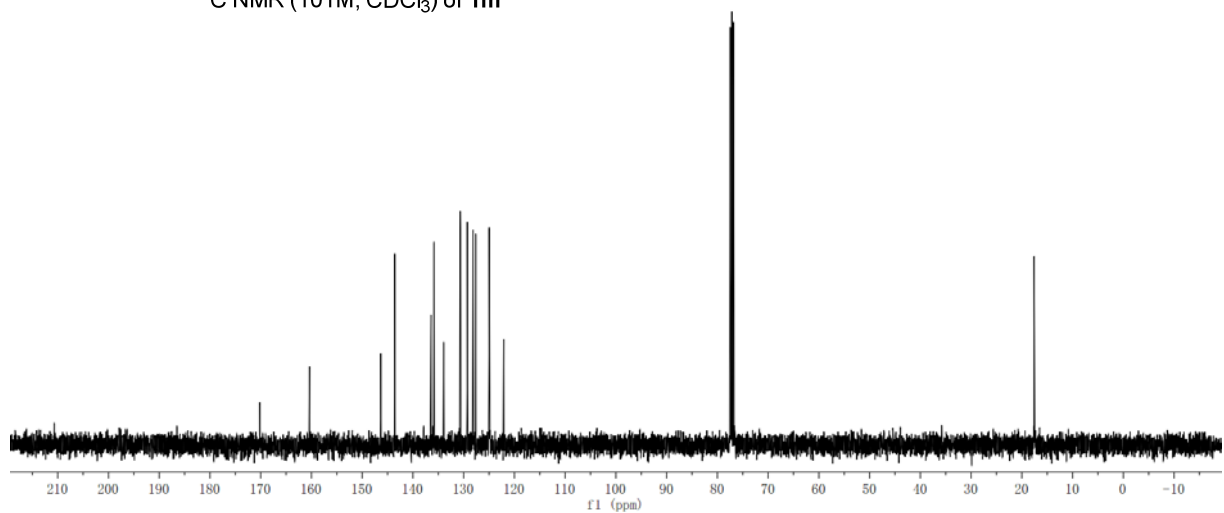

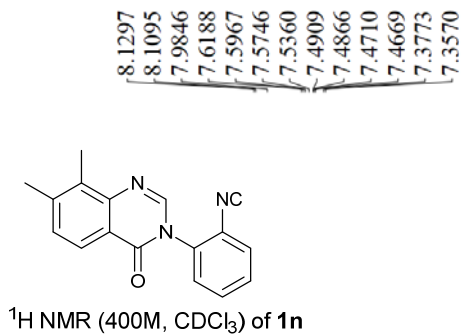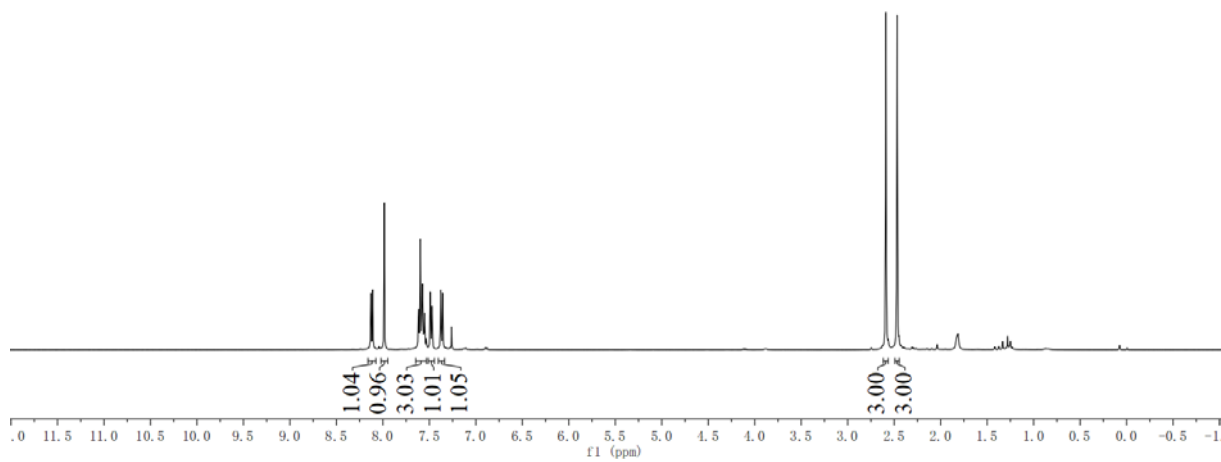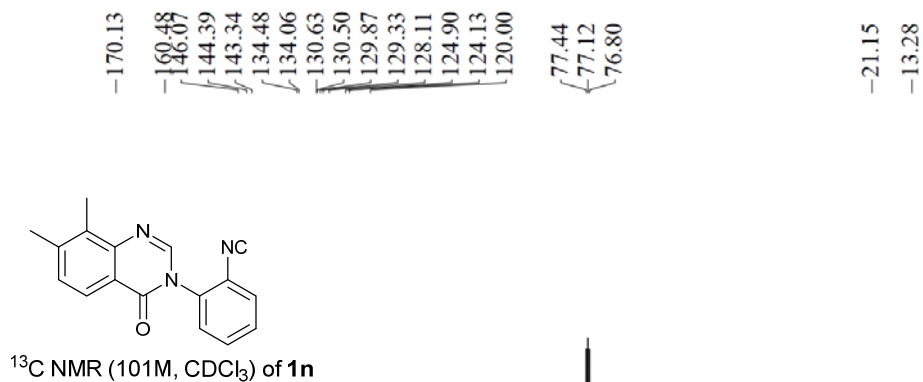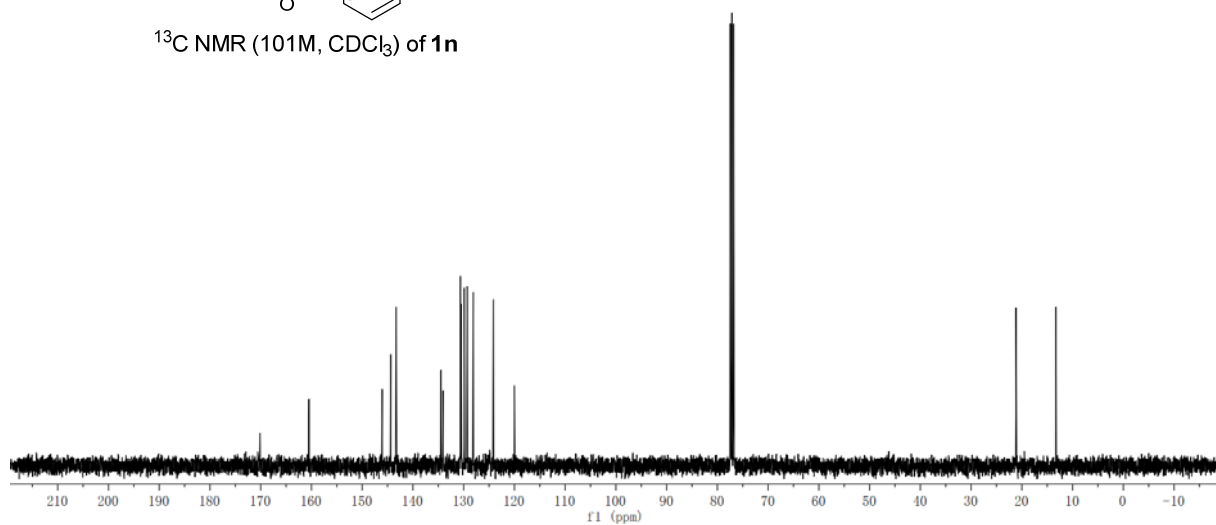

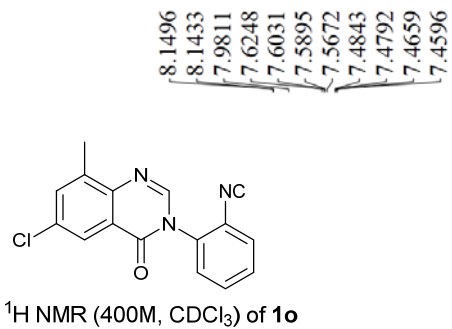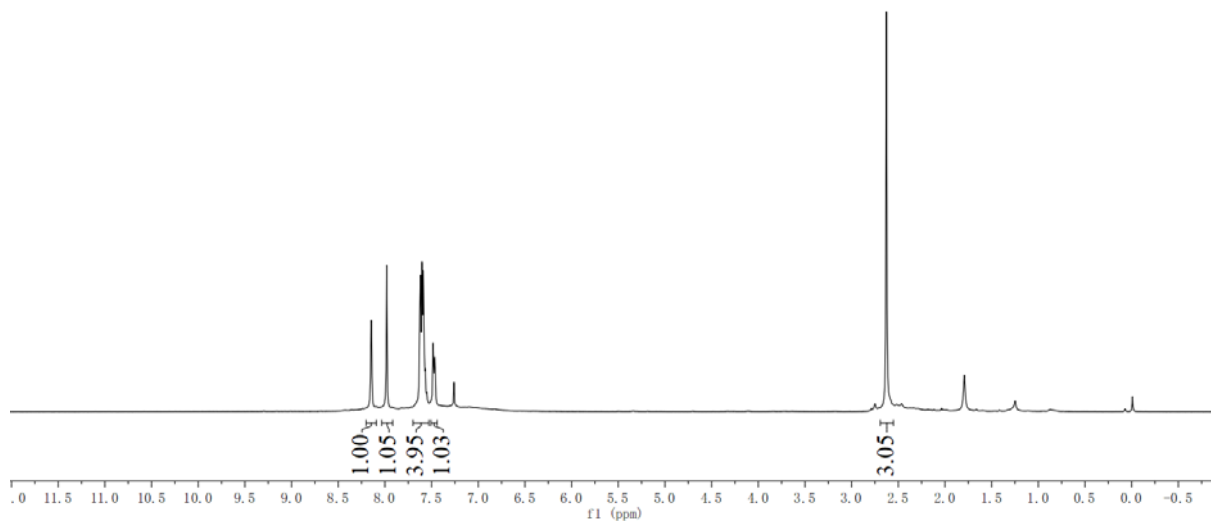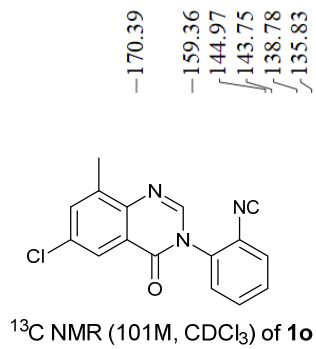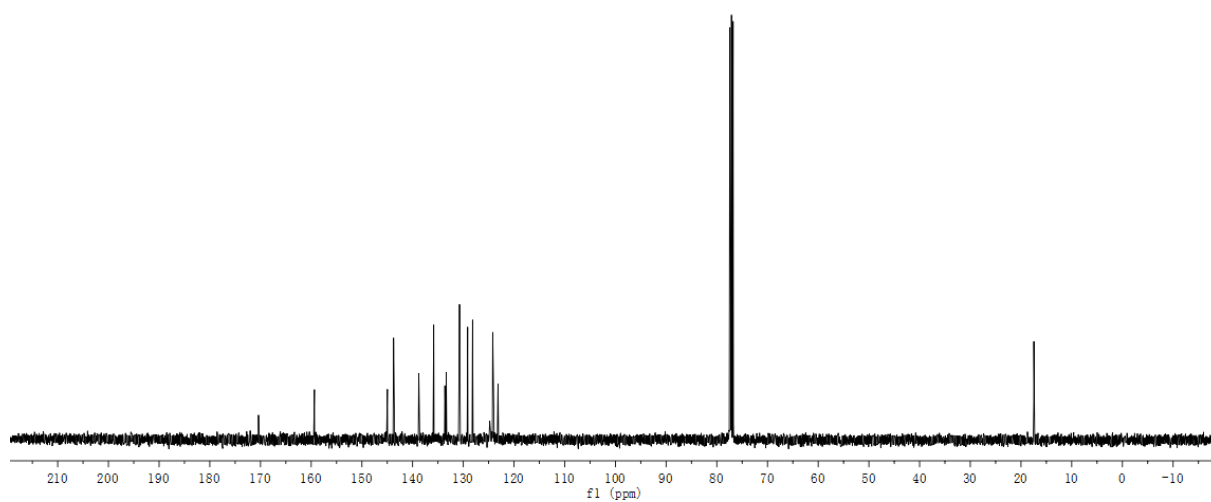

8.3808  
8.3769  
8.3609  
8.3570  
7.9924  
7.8794  
7.8551  
7.8114  
7.7911  
7.6521  
7.6302  
7.5991  
7.5756  
7.3291  
7.3106  
7.2847  
7.2583

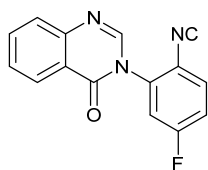

$^1\text{H NMR}$  (400M,  $\text{CDCl}_3$ ) of **1p**

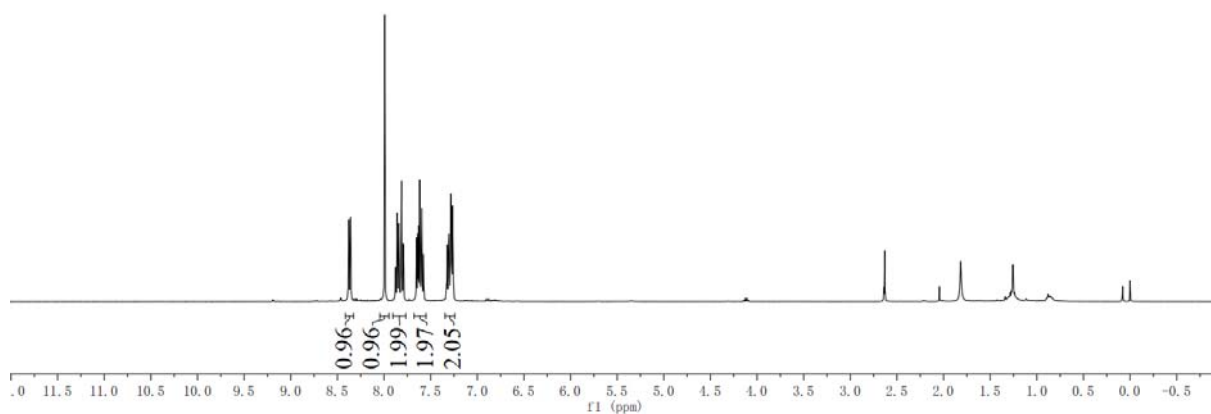

170.633  
163.476  
160.932  
159.744  
147.626  
144.187  
135.403  
135.302  
129.725  
129.631  
128.288  
127.997  
127.327  
121.984  
118.149  
117.920  
117.395  
117.145  
77.407  
77.090  
76.771

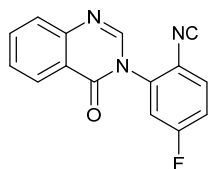

$^{13}\text{C NMR}$  (101M,  $\text{CDCl}_3$ ) of **1p**

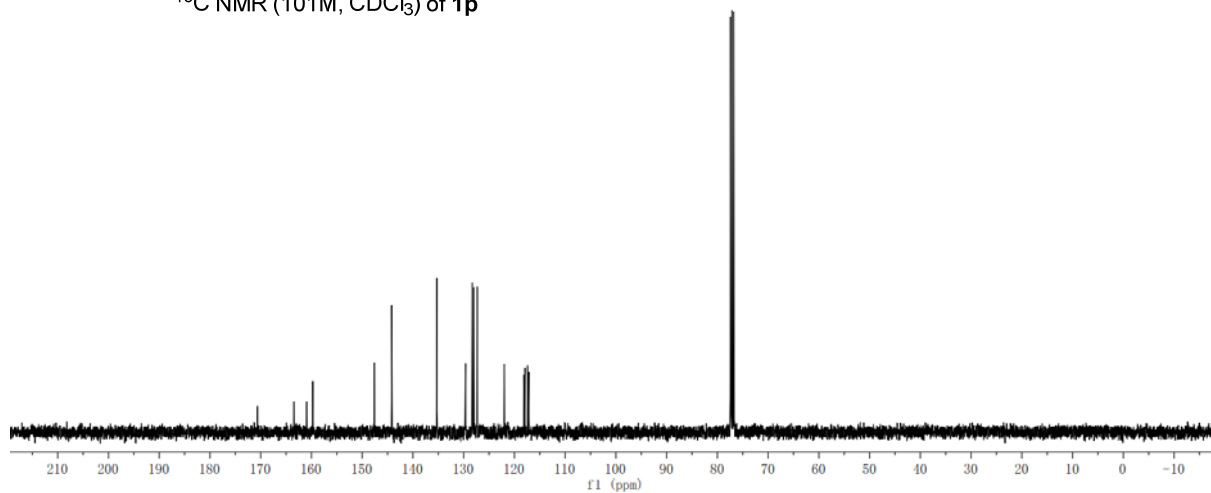

8.3785  
8.3750  
8.3584  
8.3549  
7.9745  
7.8752  
7.8333  
7.8106  
7.7868  
7.6135  
7.5931  
7.5223  
7.5157

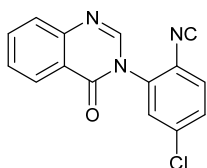

$^1\text{H}$  NMR (400M,  $\text{CDCl}_3$ ) of **1q**

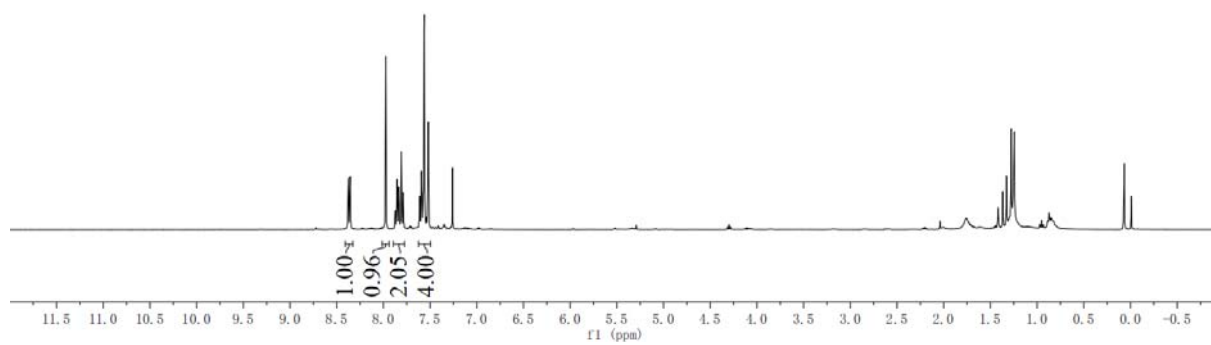

-171.74  
-159.77  
147.64  
144.17  
136.38  
135.32  
134.76  
130.96  
129.71  
128.98  
128.31  
128.01  
127.34  
121.96  
77.39  
77.07  
76.76

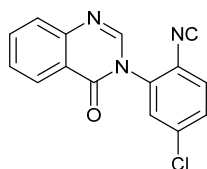

$^{13}\text{C}$  NMR (101M,  $\text{CDCl}_3$ ) of **1q**

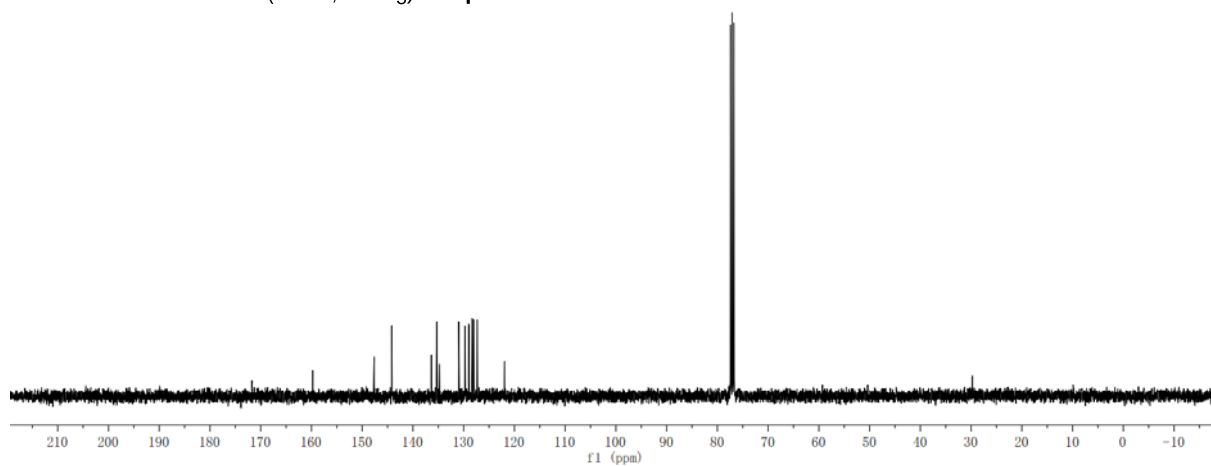



8.3627  
8.3587  
8.3428  
8.3391  
7.9657  
7.8628  
7.8453  
7.8247  
7.8209  
7.7961  
7.7929  
7.7758  
7.7726  
7.7184  
7.6971  
7.6919  
7.6632  
7.6005  
7.5971  
7.5632  
7.5597  
7.4937  
7.4725

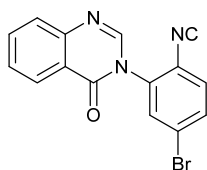

$^1\text{H NMR}$  (400M,  $\text{CDCl}_3$ ) of **1r**

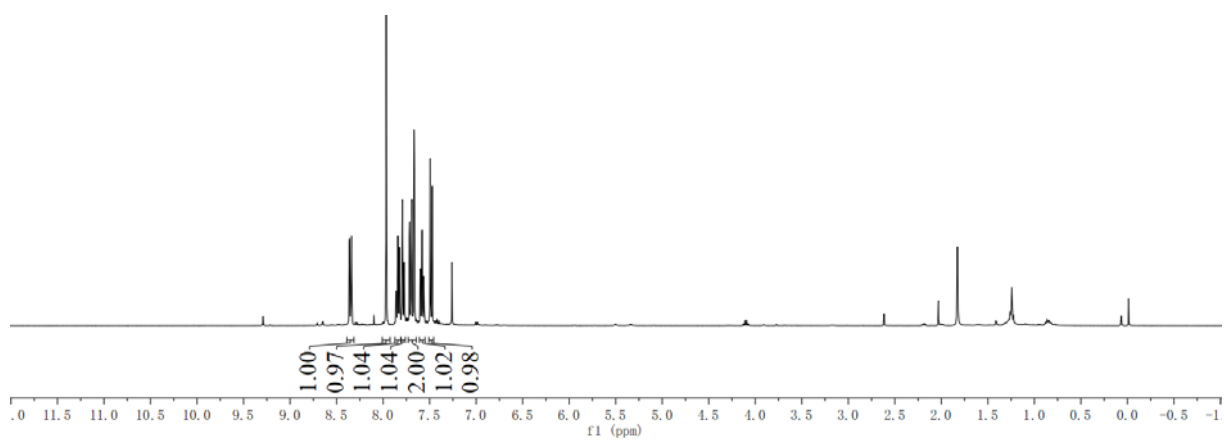

-171.91  
-159.77  
-147.62  
-144.19  
-135.31  
-134.78  
-133.91  
-132.52  
-129.10  
-128.30  
-128.00  
-127.33  
-124.02  
-123.88  
-121.94  
77.42  
77.11  
76.79

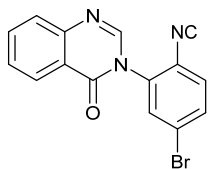

$^{13}\text{C NMR}$  (101M,  $\text{CDCl}_3$ ) of **1r**

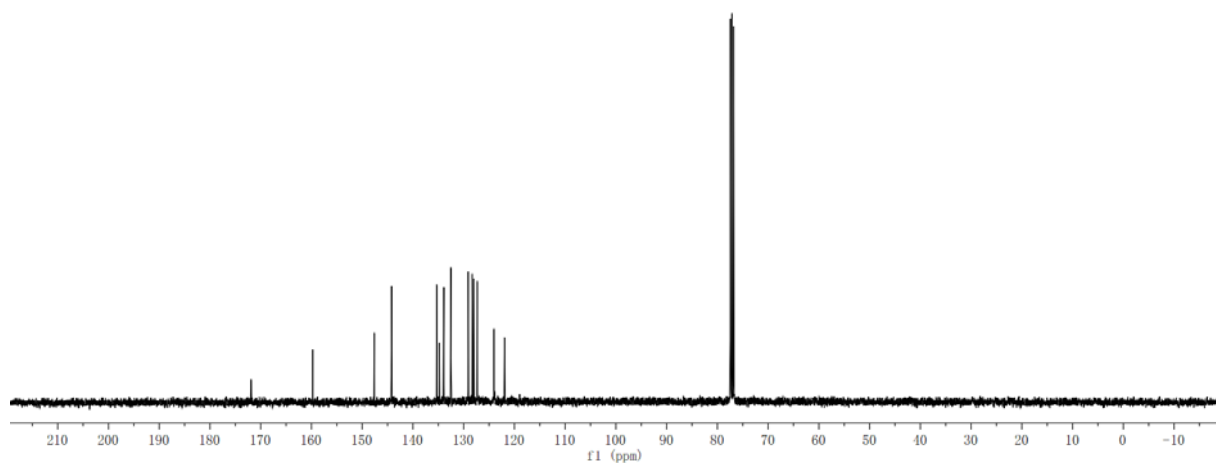

8.3705  
8.3506  
7.9929  
7.8652  
7.8455  
7.7992  
7.7790  
7.6127  
7.5919  
7.5785  
7.5568  
7.4197  
7.3984  
7.3772  
7.3056  
7.2854

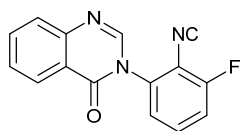

$^1\text{H}$  NMR (400M,  $\text{CDCl}_3$ ) of **1s**

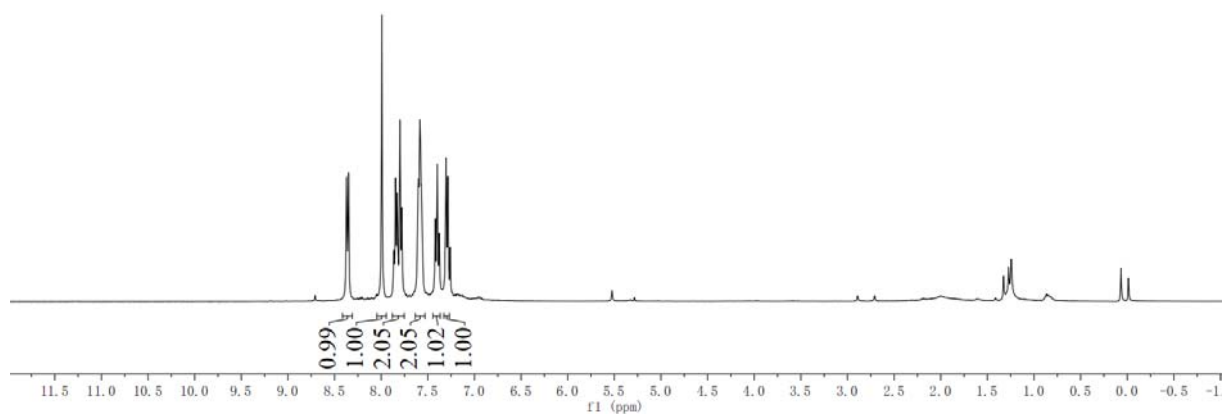

-176.290  
159.735  
159.491  
156.905  
147.643  
144.341  
135.287  
135.178  
131.031  
130.943  
128.282  
127.958  
127.346  
124.561  
124.525  
121.961  
118.026  
117.839  
77.419  
77.100  
76.783

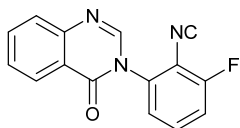

$^{13}\text{C}$  NMR (101M,  $\text{CDCl}_3$ ) of **1s**

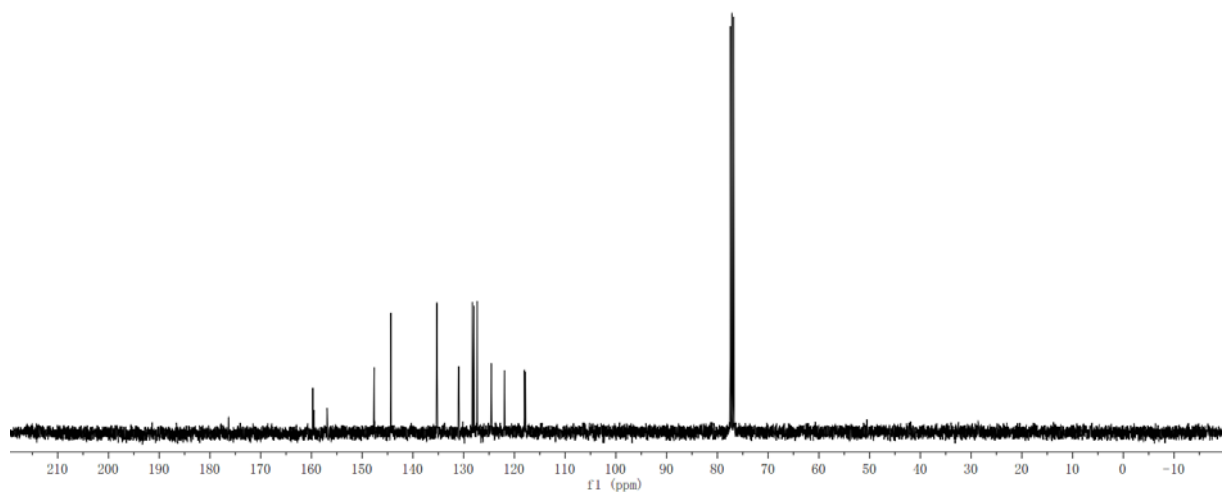

8.3848  
8.3810  
8.3648  
8.3609  
7.9860  
7.8767  
7.8387  
7.8103  
7.7901  
7.6961  
7.6927  
7.6754  
7.6720  
7.6148  
7.5973  
7.5535  
7.5330  
7.4245  
7.4212  
7.4045  
7.4013

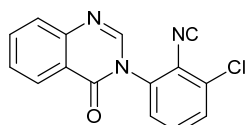

$^1\text{H NMR}$  (400M,  $\text{CDCl}_3$ ) of **1t**

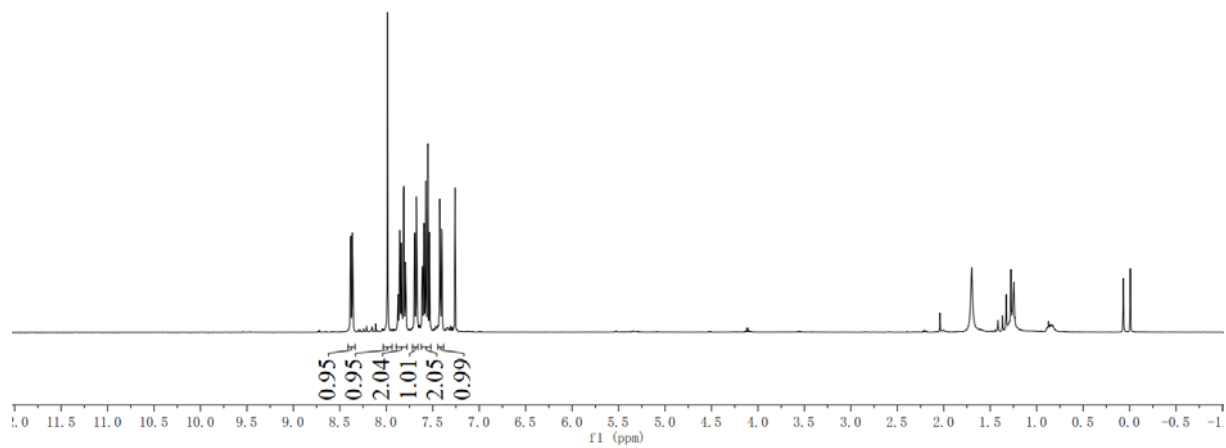

-175.30  
-159.81  
147.68  
144.31  
135.32  
135.28  
132.84  
131.27  
130.49  
128.27  
127.98  
127.47  
127.36  
122.01  
77.38  
77.07  
76.75

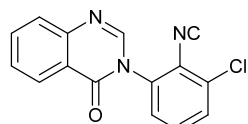

$^{13}\text{C NMR}$  (101M,  $\text{CDCl}_3$ ) of **1t**

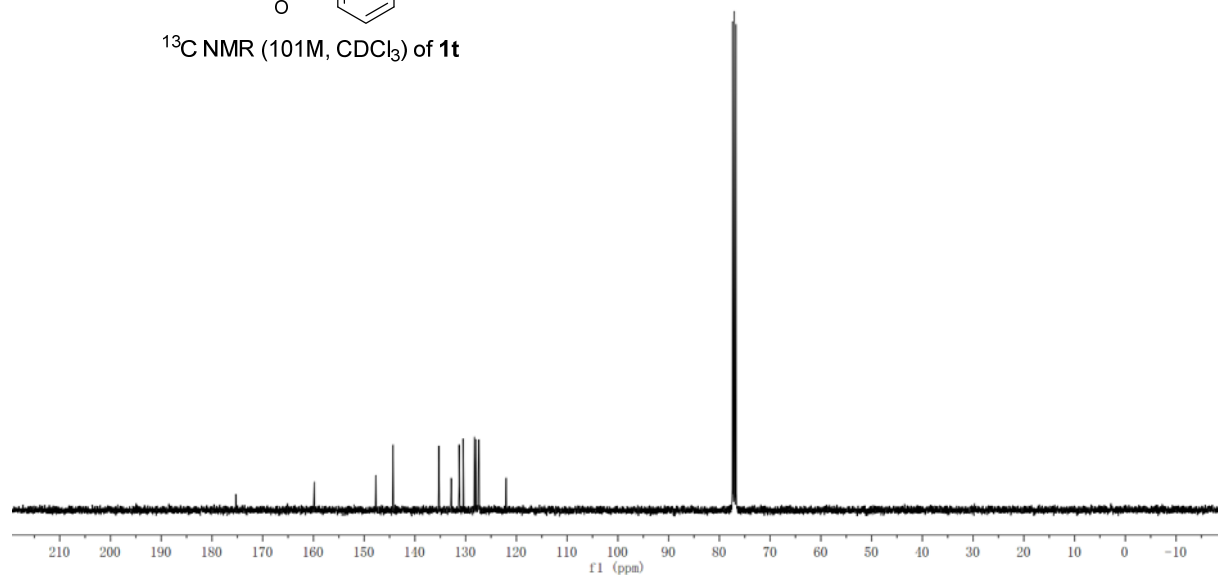

8.3665  
8.3627  
8.3464  
8.3428  
7.9785  
7.8420  
7.8177  
7.8005  
7.7613  
7.5789  
7.5752  
7.5416  
7.5379  
7.4134  
7.3742  
7.3516  
7.3315

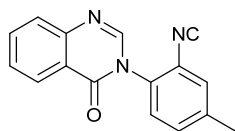

$^1\text{H}$  NMR (400M,  $\text{CDCl}_3$ ) of **1u**

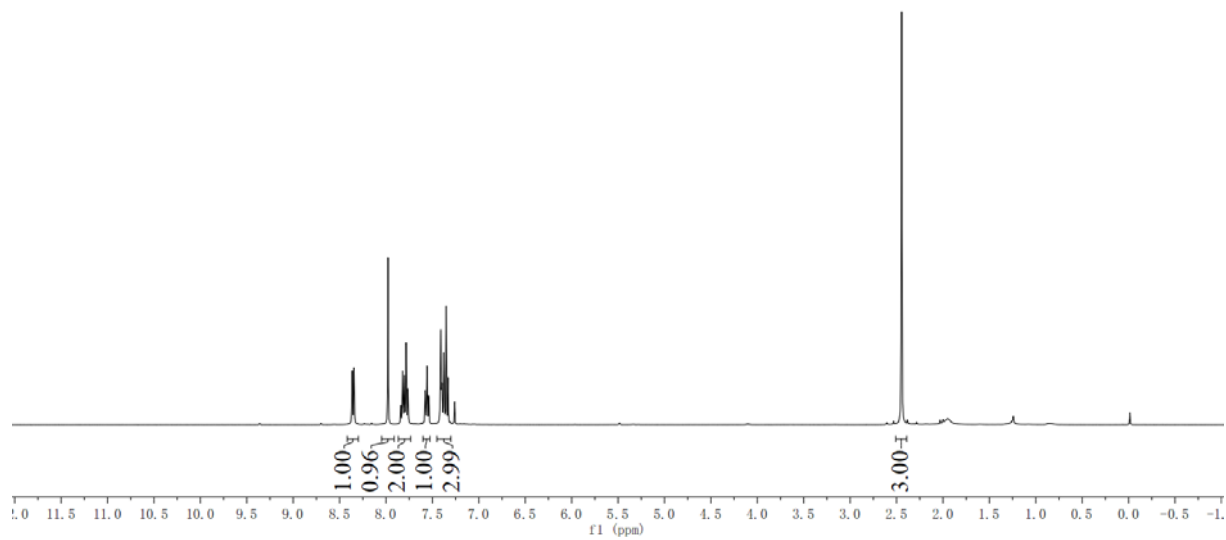

169.69  
147.80  
145.11  
141.52  
135.01  
131.39  
131.15  
128.84  
128.46  
128.00  
127.85  
127.29  
122.15  
77.44  
77.12  
76.81  
21.11

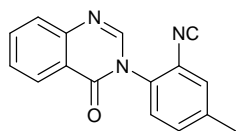

$^{13}\text{C}$  NMR (101M,  $\text{CDCl}_3$ ) of **1u**

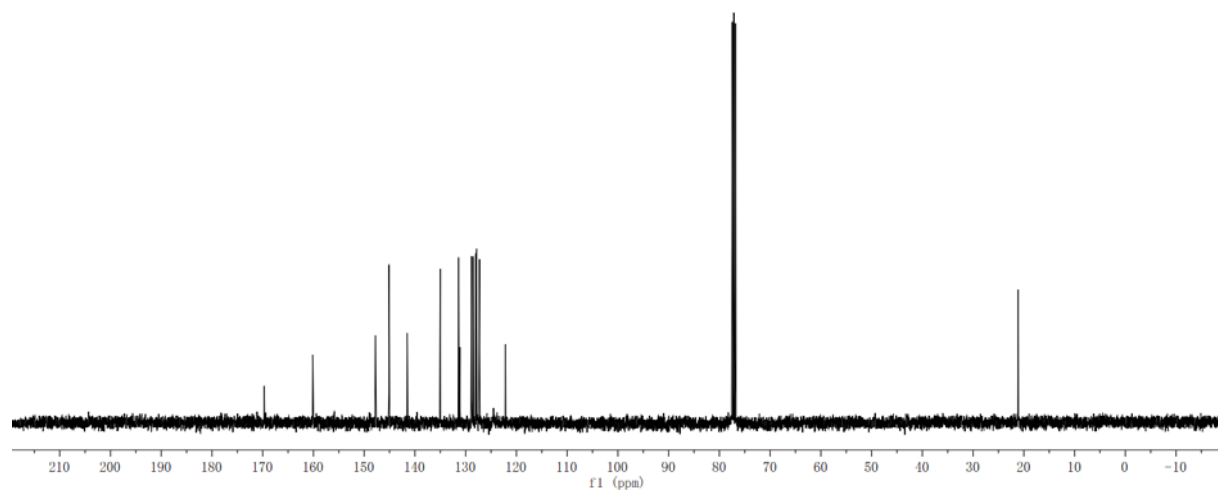

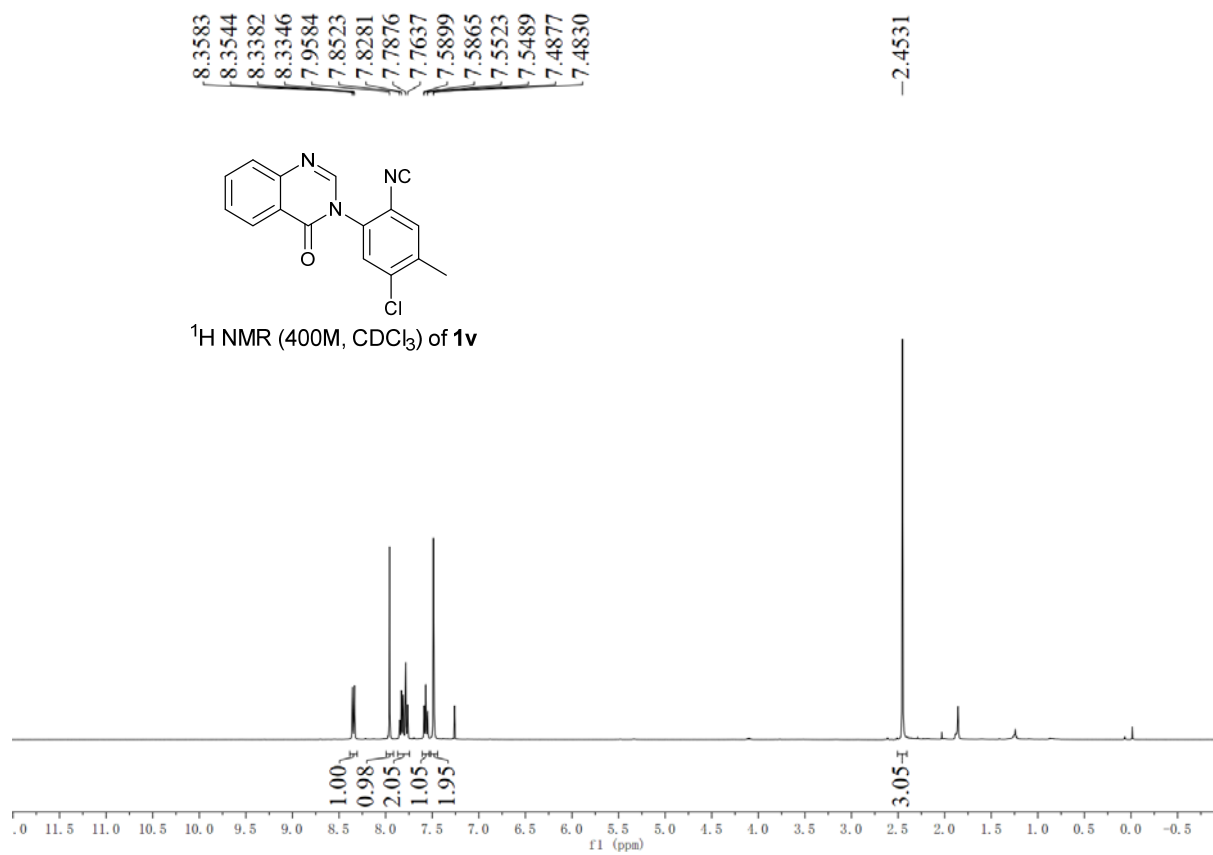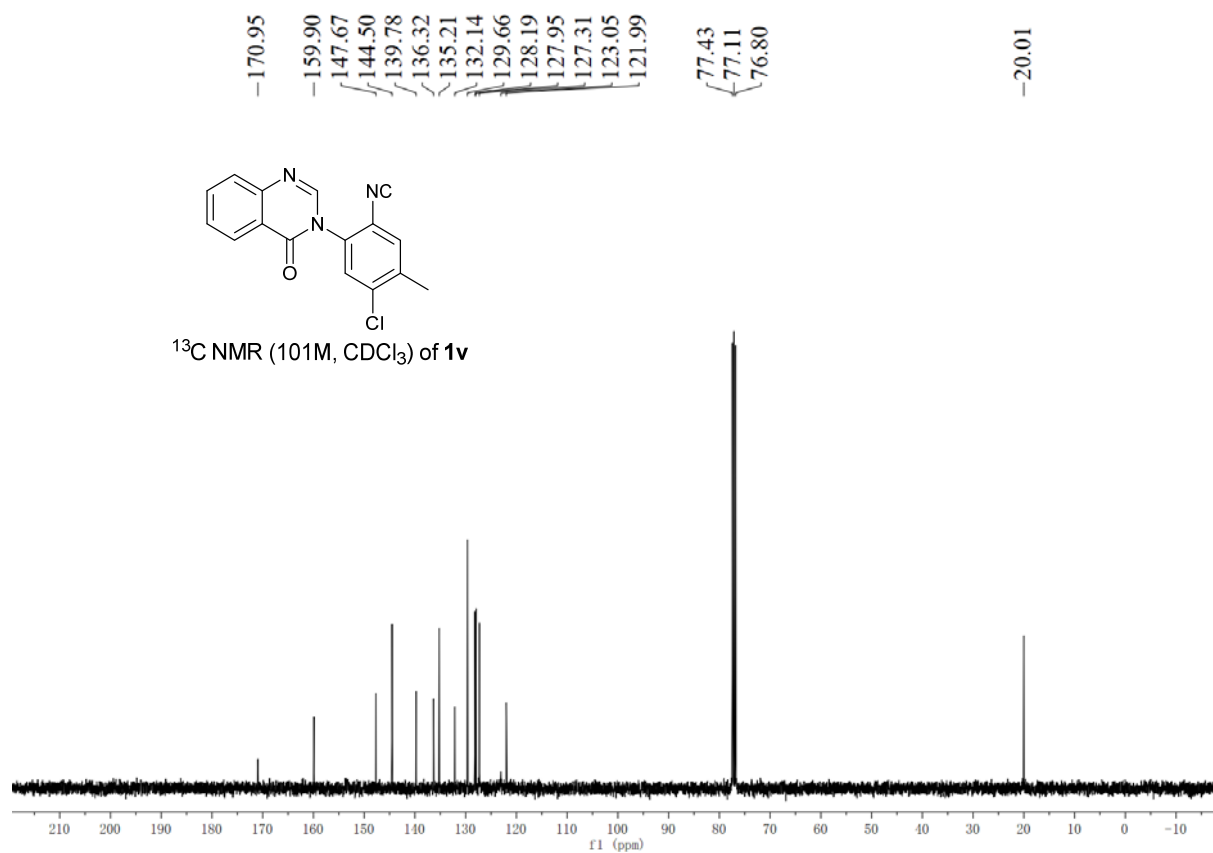

9.5860  
9.5817  
9.5657  
9.5614  
8.4574  
8.4547  
8.4366  
8.4337  
8.0128  
8.0074  
7.9942  
7.9888  
7.8665  
7.8521  
7.8351  
7.8144  
7.6082  
7.5824  
7.5502  
7.5080  
5.9463  
5.9323  
5.9271  
5.9123  
4.3301  
4.3136  
4.2932  
4.2765  
4.1232  
4.1061  
4.0856  
4.0696  
2.7014  
2.6827  
2.6515  
2.1683  
2.1155  
2.0612

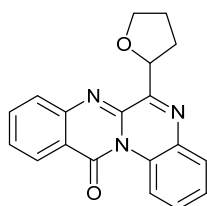

$^1\text{H NMR}$  (400M,  $\text{CDCl}_3$ ) of 3aa

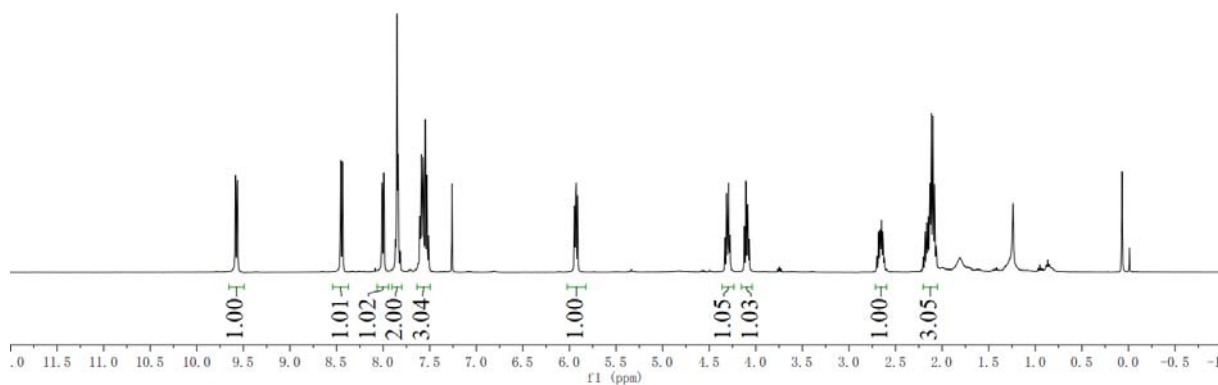

161.93  
161.50  
145.38  
138.46  
135.00  
134.78  
130.16  
129.33  
128.13  
128.01  
127.99  
127.31  
127.25  
121.26  
120.36  
77.40  
77.28  
77.08  
76.77  
69.39  
-31.54  
-25.74

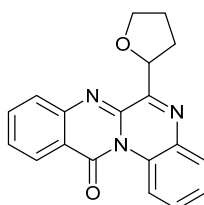

$^{13}\text{C NMR}$  (101M,  $\text{CDCl}_3$ ) of 3aa

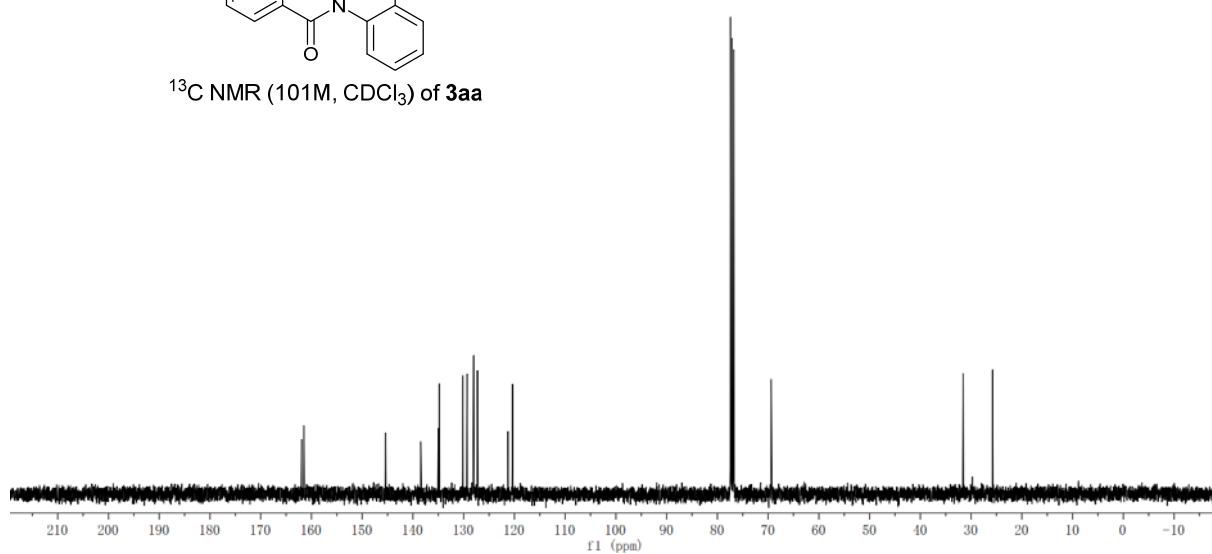

9.4123  
9.4066  
9.3911  
9.3872  
7.9896  
7.9848  
7.9815  
7.9657  
7.7824  
7.7487  
7.7415  
7.7284  
7.6472  
7.6428  
7.6264  
7.6222  
7.5496  
7.5002  
7.2375  
7.2173  
7.2078  
7.1877  
5.8869  
5.8730  
5.8677  
5.8527  
4.2987  
4.2653  
4.2445  
4.0995  
4.0660  
4.0612  
4.0459  
2.6358  
2.5901  
2.5842  
2.1067

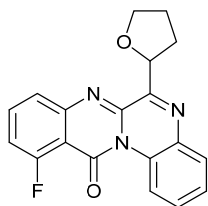

$^1\text{H}$  NMR (400M,  $\text{CDCl}_3$ ) of 3ba

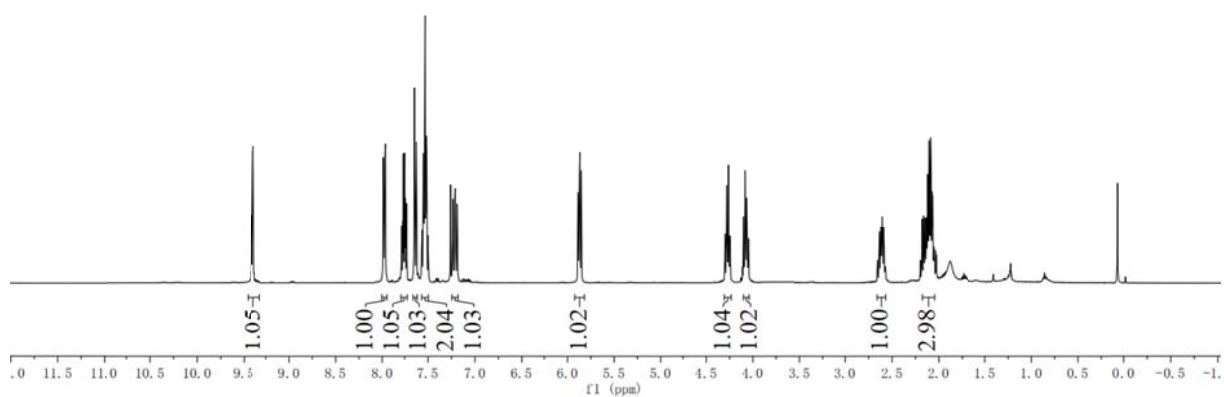

162.623  
161.121  
159.965  
158.887  
158.839  
147.380  
139.074  
135.162  
135.057  
134.995  
130.224  
129.499  
127.477  
127.428  
123.945  
123.901  
120.129  
114.344  
114.135  
110.867  
110.815  
77.416  
77.240  
77.098  
76.780  
69.396  
-31.415  
-25.743

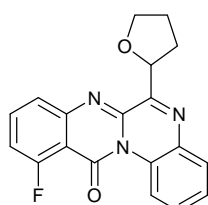

$^{13}\text{C}$  NMR (101M,  $\text{CDCl}_3$ ) of 3ba

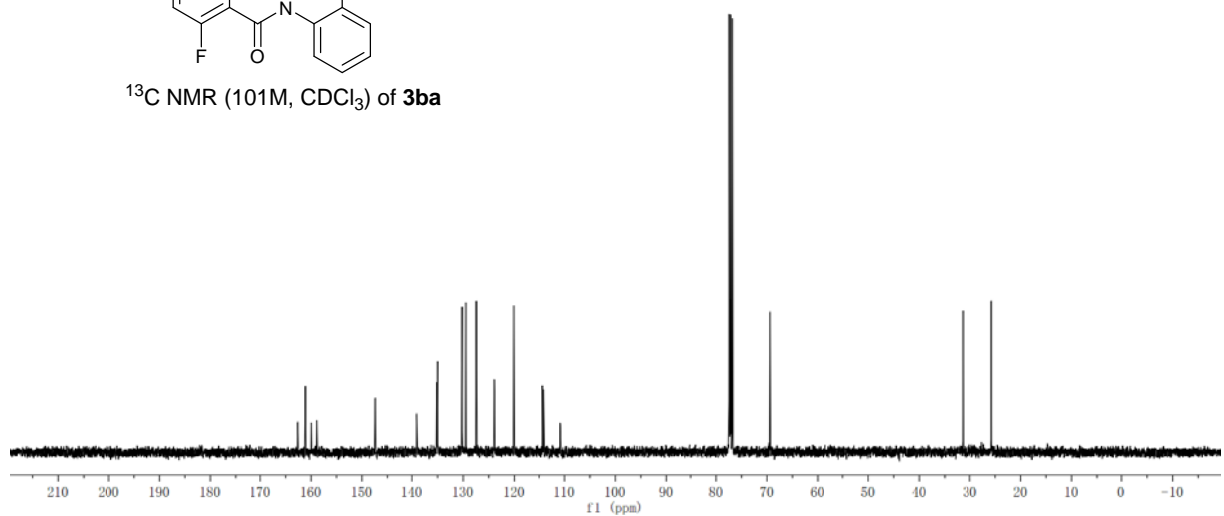

9.3017  
9.2961  
9.2808  
9.2768  
7.9901  
7.9853  
7.9727  
7.9661  
7.7465  
7.7432  
7.7261  
7.7227  
7.6833  
7.6639  
7.6437  
7.5641  
7.5334  
7.5192  
7.5102  
5.8822  
5.8684  
5.8630  
5.8480  
4.3089  
4.2921  
4.2677  
4.2468  
4.1024  
4.0815  
4.0689  
4.0488  
2.6511  
2.6210  
2.5871  
2.1965  
2.1630  
2.0924  
2.0502

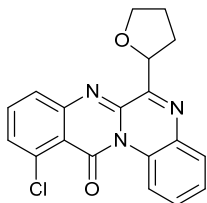

$^1\text{H NMR}$  (400M,  $\text{CDCl}_3$ ) of 3ca

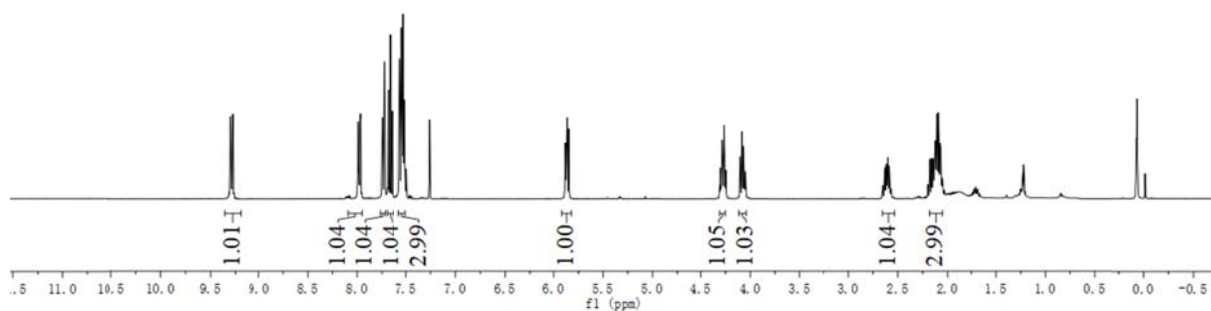

161.05  
159.76  
147.84  
138.86  
135.05  
134.29  
134.02  
130.43  
130.23  
129.39  
127.42  
127.31  
127.20  
119.97  
118.20  
77.41  
77.13  
77.09  
76.77  
69.40  
-31.41  
-25.75

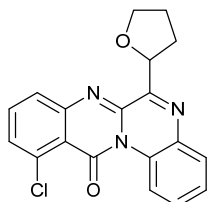

$^{13}\text{C NMR}$  (101M,  $\text{CDCl}_3$ ) of 3ca

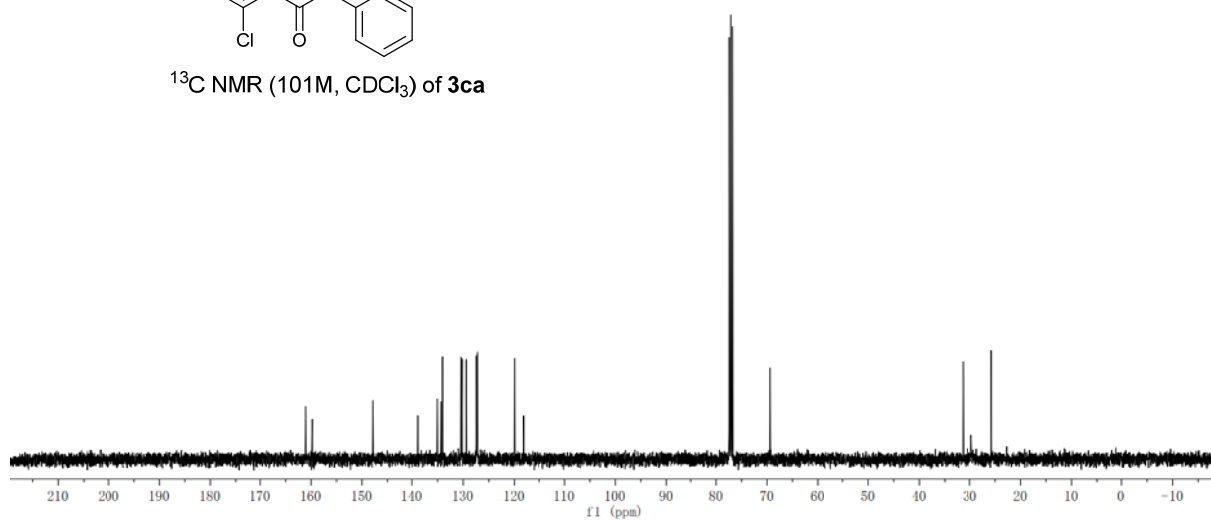



9.5776  
 9.5724  
 9.5565  
 9.5524  
 8.0887  
 8.0814  
 8.0674  
 8.0600  
 8.0124  
 8.0077  
 7.9945  
 7.9883  
 7.9021  
 7.8898  
 7.8797  
 7.8675  
 7.6056  
 7.5859  
 7.5584  
 7.5270  
 5.9339  
 5.9203  
 5.9147  
 5.8998  
 4.3167  
 4.3000  
 4.2968  
 4.2628  
 4.1187  
 4.0851  
 4.0805  
 4.0650  
 2.6706  
 2.6342  
 2.6059  
 2.5870  
 2.2185  
 2.1625  
 2.1171  
 2.0639

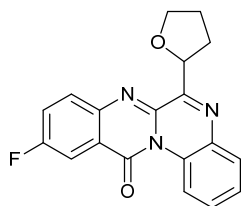

<sup>1</sup>H NMR (400M, CDCl<sub>3</sub>) of **3da**

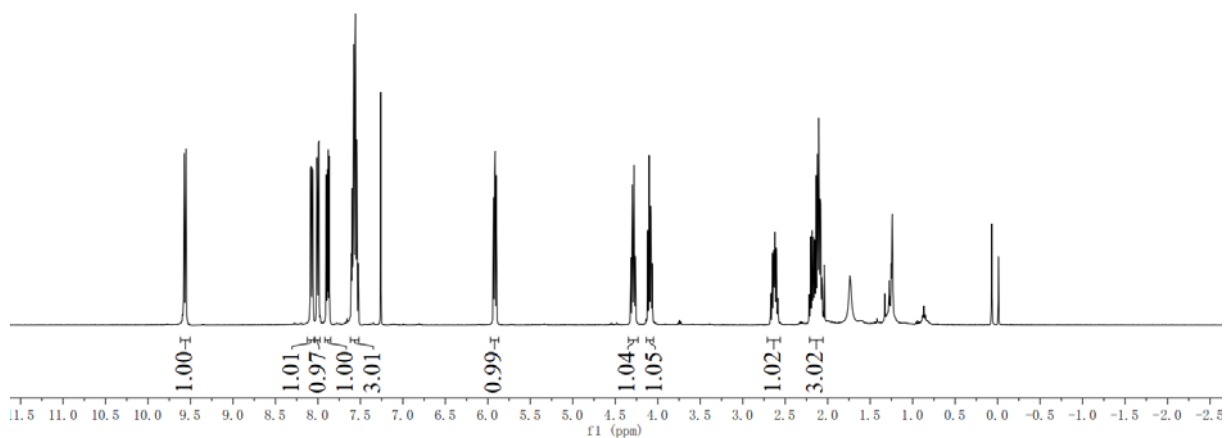

162.860  
 161.329  
 161.177  
 161.139  
 160.367  
 142.135  
 142.115  
 137.959  
 137.937  
 135.071  
 130.670  
 130.588  
 130.210  
 129.424  
 127.884  
 127.485  
 123.934  
 123.692  
 122.584  
 122.497  
 120.369  
 112.211  
 111.971  
 77.377  
 77.281  
 77.062  
 76.742  
 69.394  
 -31.408  
 -25.759

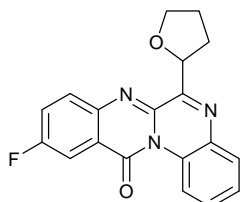

<sup>13</sup>C NMR (101M, CDCl<sub>3</sub>) of **3da**

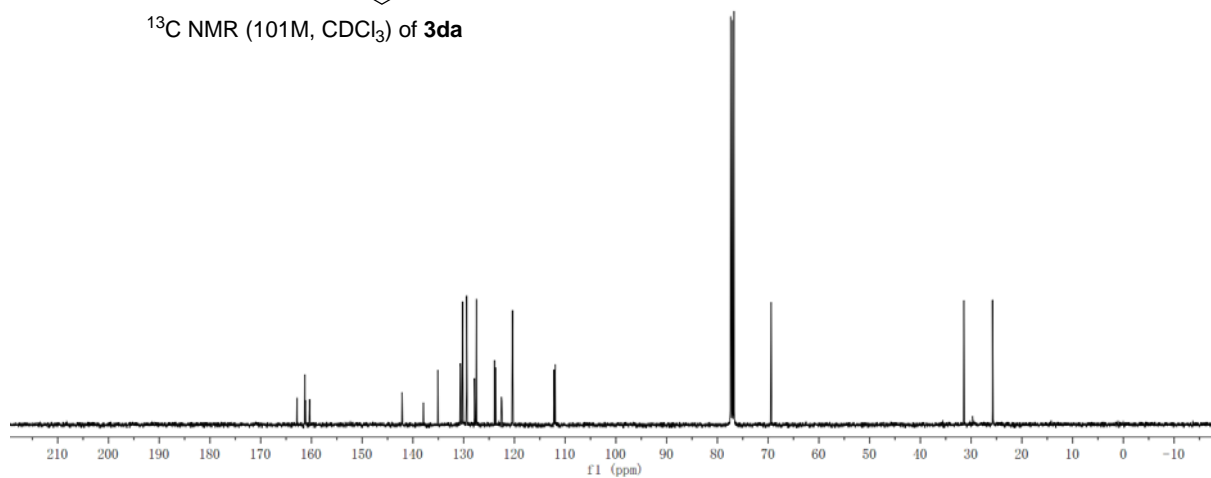

9.5356  
 9.5301  
 9.5145  
 9.5106  
 8.3827  
 8.3811  
 8.3768  
 8.3754  
 8.0052  
 8.0004  
 7.9876  
 7.9812  
 7.8092  
 7.8077  
 7.7462  
 7.7405  
 7.5882  
 7.5442  
 7.5201  
 7.5157  
 5.9174  
 5.9037  
 5.8981  
 5.8832  
 4.3093  
 4.2925  
 4.2892  
 4.2552  
 4.1123  
 4.0760  
 4.0736  
 4.0587  
 2.6631  
 2.6442  
 2.6325  
 2.1662  
 2.1128  
 0.0508

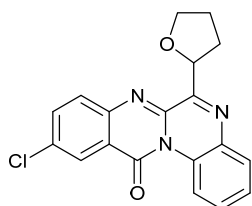

<sup>1</sup>H NMR (400M, CDCl<sub>3</sub>) of 3ea

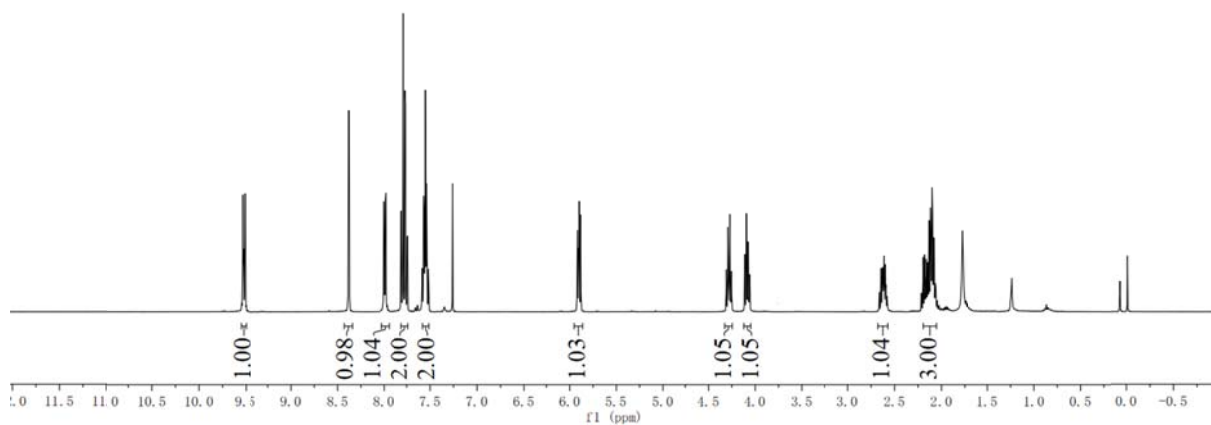

161.26  
 160.87  
 143.86  
 138.52  
 135.34  
 135.03  
 133.86  
 130.24  
 129.66  
 129.52  
 127.89  
 127.55  
 126.59  
 122.11  
 120.32  
 77.40  
 77.28  
 77.08  
 76.76  
 69.41  
 -31.43  
 -25.76

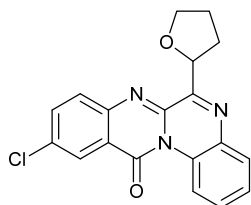

<sup>13</sup>C NMR (101M, CDCl<sub>3</sub>) of 3ea

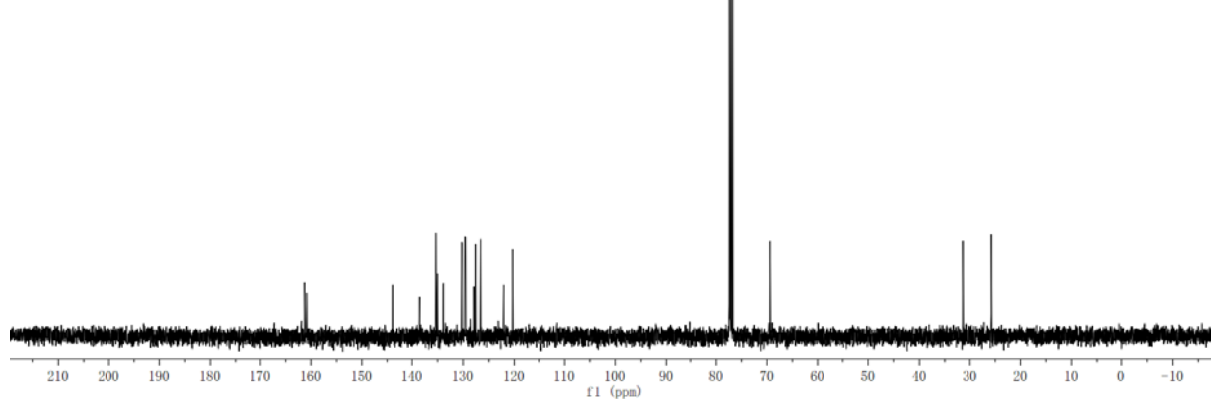

9.5119  
9.5062  
9.4912  
9.4870  
8.5280  
8.5224  
7.9942  
7.9892  
7.9769  
7.9703  
7.8947  
7.8889  
7.8729  
7.8672  
7.7157  
7.6940  
7.5753  
7.5699  
7.5084  
7.5030  
5.9078  
5.8941  
5.8886  
5.8738  
4.3022  
4.2840  
4.2658  
4.2482  
4.1050  
4.0873  
4.0515  
2.6340  
2.5881  
2.5696  
2.1954  
2.1150  
2.1082  
0.0334

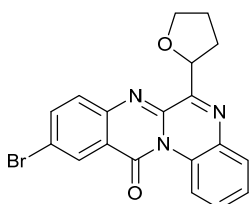

$^1\text{H NMR}$  (400M,  $\text{CDCl}_3$ ) of **3fa**

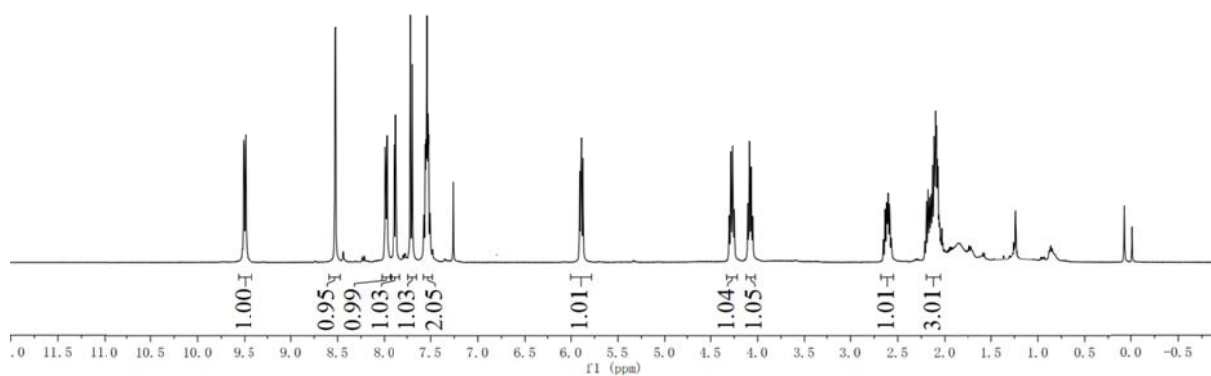

161.25  
160.68  
144.17  
138.63  
138.03  
135.03  
130.24  
129.78  
129.73  
129.51  
127.89  
127.54  
122.38  
121.68  
120.30  
77.40  
77.26  
77.08  
76.76  
69.39  
-31.41  
-25.76

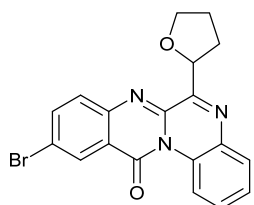

$^{13}\text{C NMR}$  (101M,  $\text{CDCl}_3$ ) of **3fa**

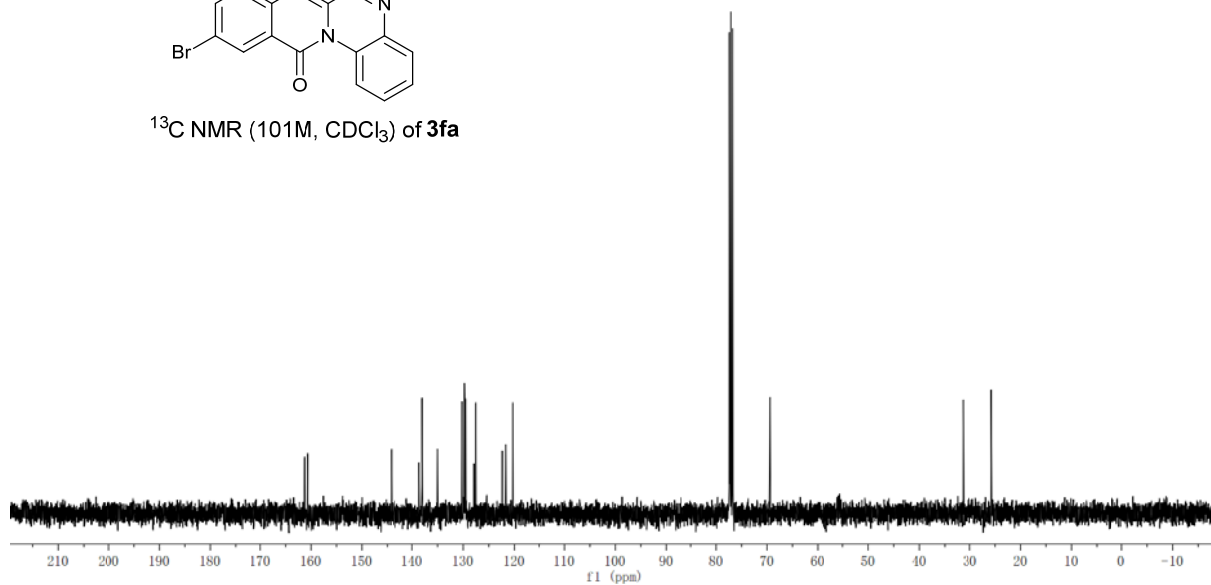

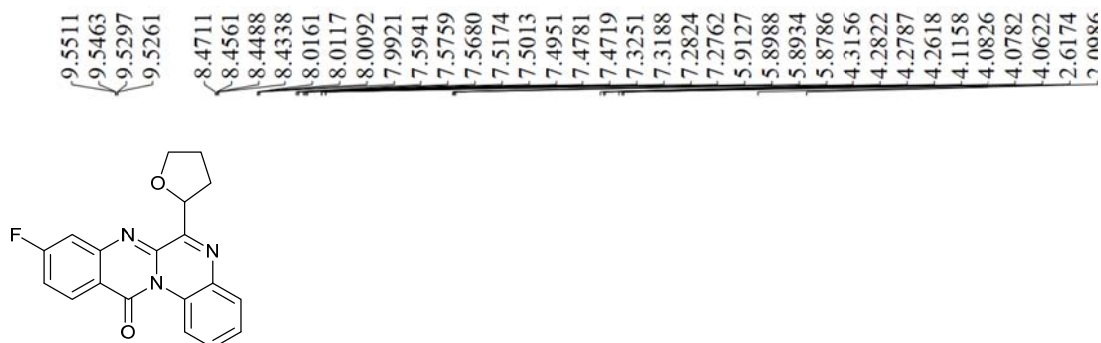

<sup>1</sup>H NMR (400M, CDCl<sub>3</sub>) of **3ga**

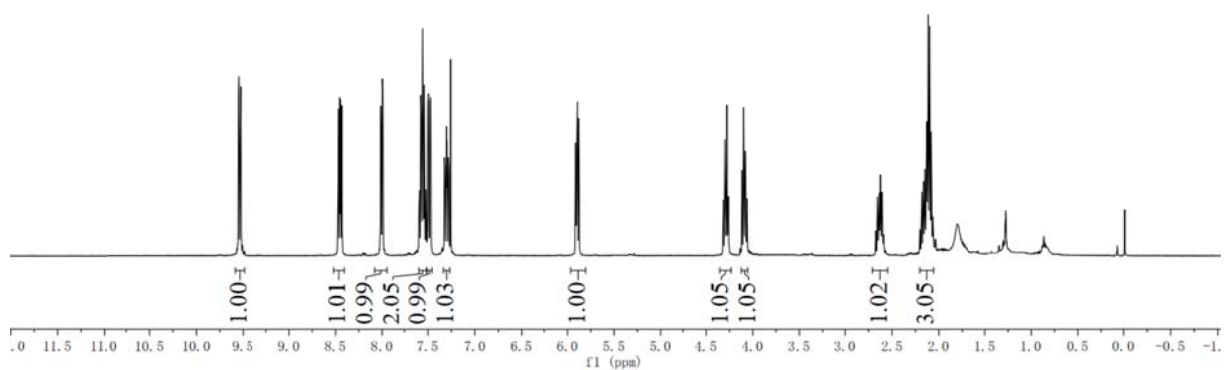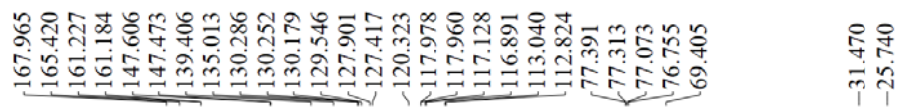

<sup>13</sup>C NMR (101M, CDCl<sub>3</sub>) of **3ga**

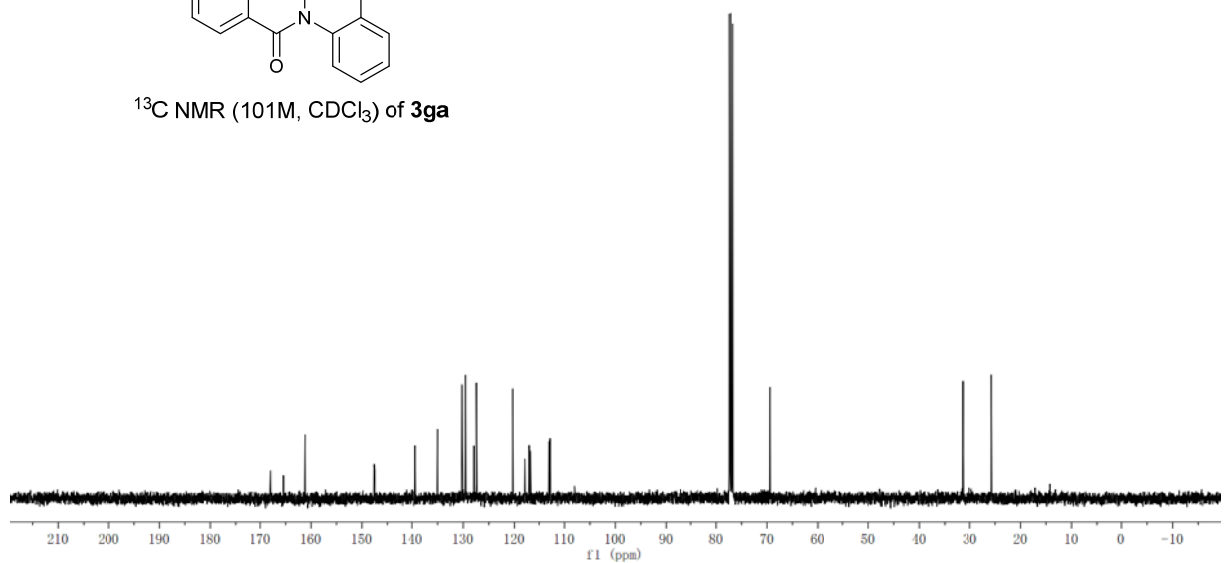

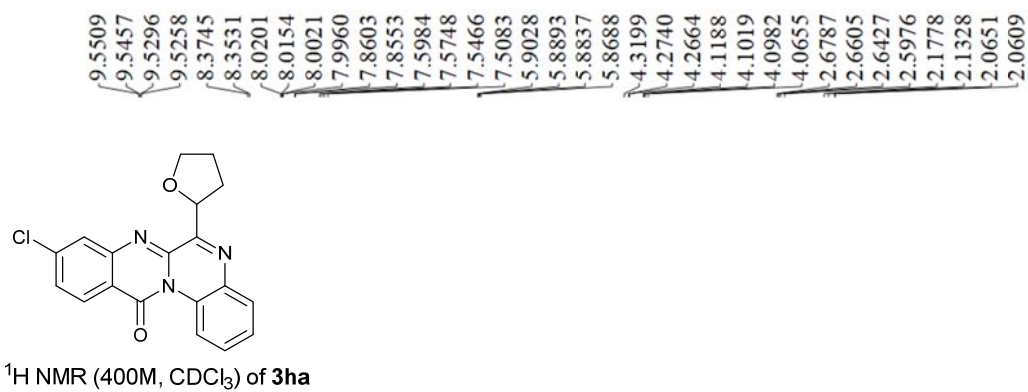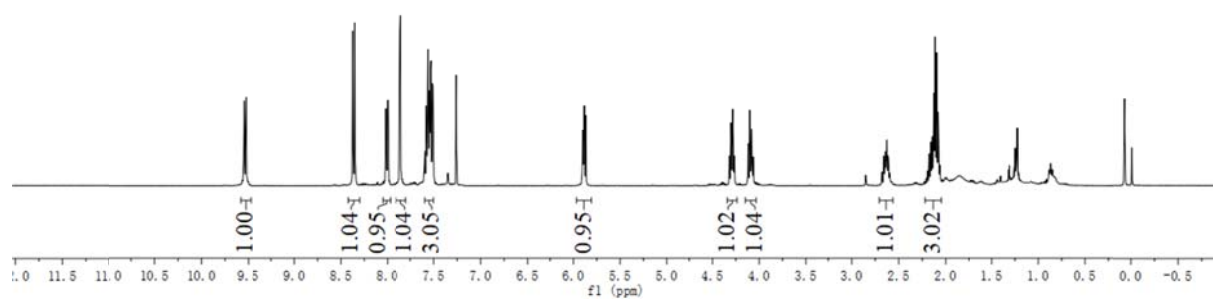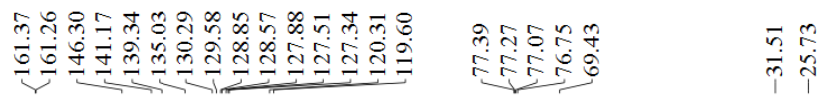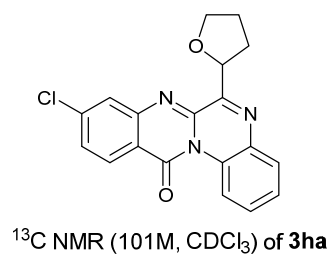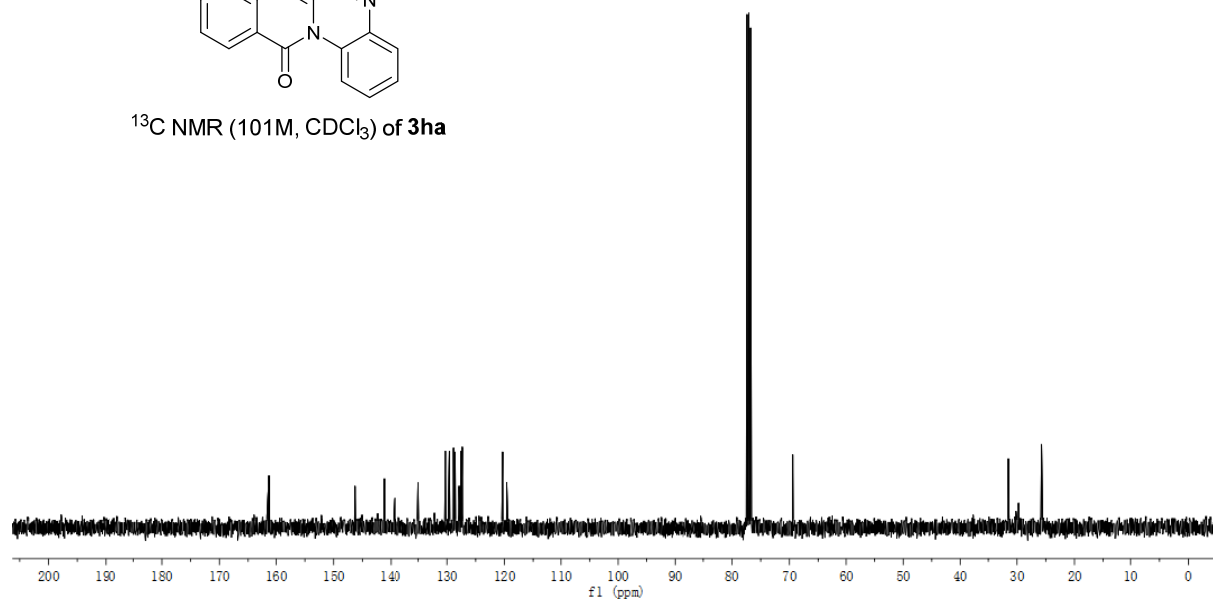

9.5356  
9.5297  
9.5105  
8.2180  
8.2127  
8.1966  
8.1933  
8.0265  
8.0217  
8.0181  
8.0026  
7.5940  
7.5884  
7.5191  
7.4871  
5.9114  
5.9051  
5.8922  
5.8767  
4.3263  
4.2932  
4.2892  
4.2722  
4.1142  
4.0819  
4.0772  
4.0615  
2.7587  
2.7300  
2.6981  
2.6910  
2.1718  
2.1311  
2.1026  
2.0650

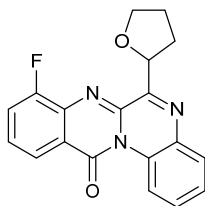

<sup>1</sup>H NMR (400M, CDCl<sub>3</sub>) of **3ia**

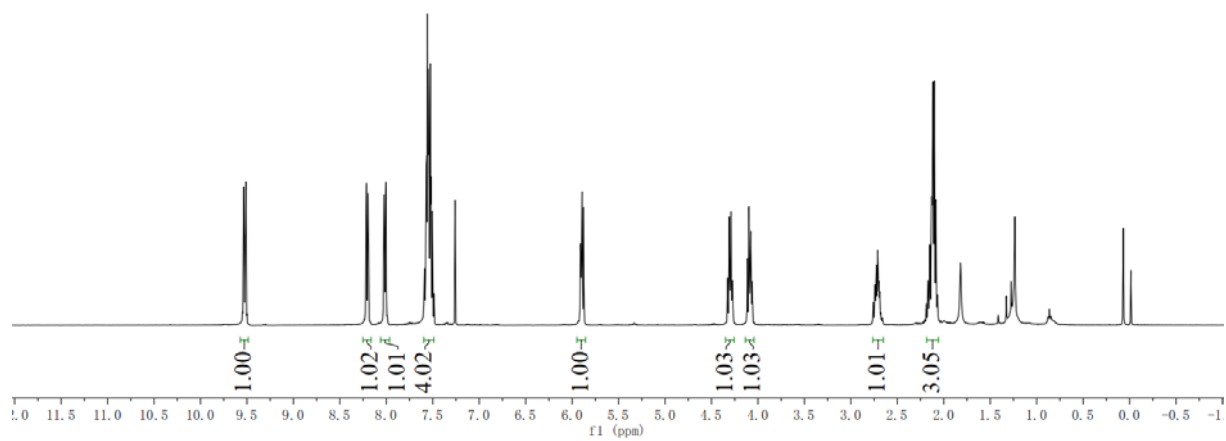

161.613  
161.036  
161.004  
158.560  
155.986  
135.126  
130.289  
129.515  
128.008  
127.933  
127.822  
127.575  
122.994  
122.814  
122.768  
120.328  
120.068  
119.886  
77.708  
77.404  
77.086  
76.768  
69.413  
-31.663  
-25.828

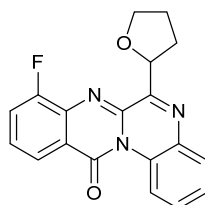

<sup>13</sup>C NMR (101M, CDCl<sub>3</sub>) of **3ia**

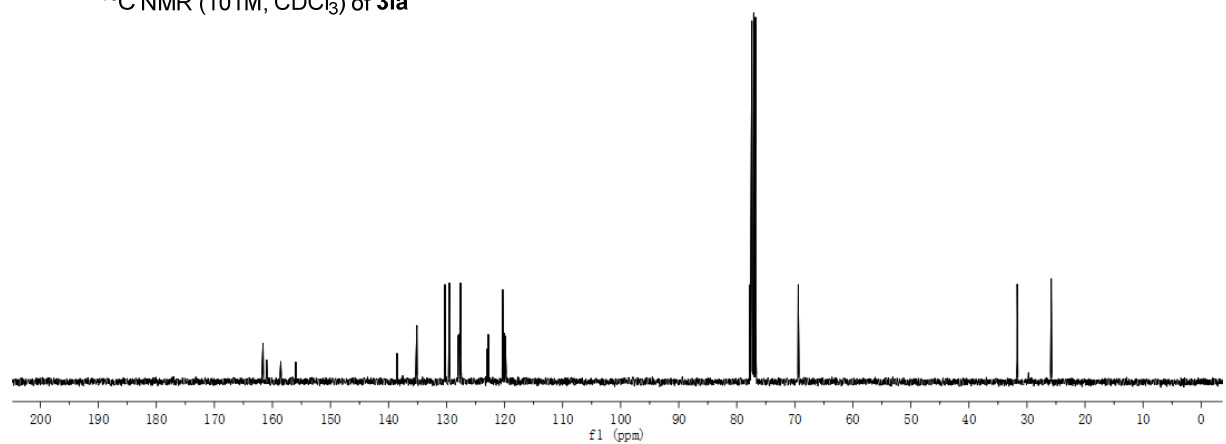

9.5237  
9.5142  
9.4993  
9.4807  
8.2899  
8.2864  
8.2697  
8.2662  
8.0273  
8.0167  
8.0098  
8.0032  
7.8661  
7.8626  
7.8468  
7.8433  
7.5492  
7.5304  
7.5128  
7.4624  
7.4427  
7.4230  
5.9020  
5.8870  
5.8826  
5.8673  
4.3286  
4.3110  
4.2900  
4.2739  
4.1215  
4.1009  
4.0861  
4.0688  
2.8195  
2.1387  
2.1033  
0.0744

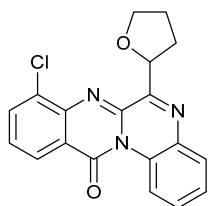

<sup>1</sup>H NMR (400M, CDCl<sub>3</sub>) of **3ja**

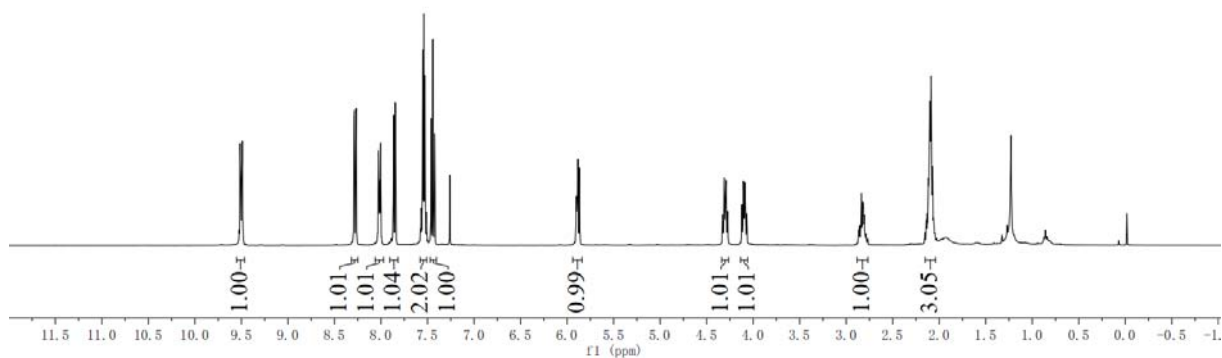

161.81  
161.29  
142.12  
138.36  
135.12  
134.82  
132.62  
130.28  
129.53  
127.82  
127.71  
127.61  
126.01  
122.62  
120.21  
77.88  
77.42  
77.10  
76.78  
69.42  
-31.95  
-25.80

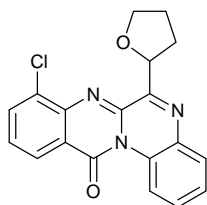

<sup>13</sup>C NMR (101M, CDCl<sub>3</sub>) of **3ja**

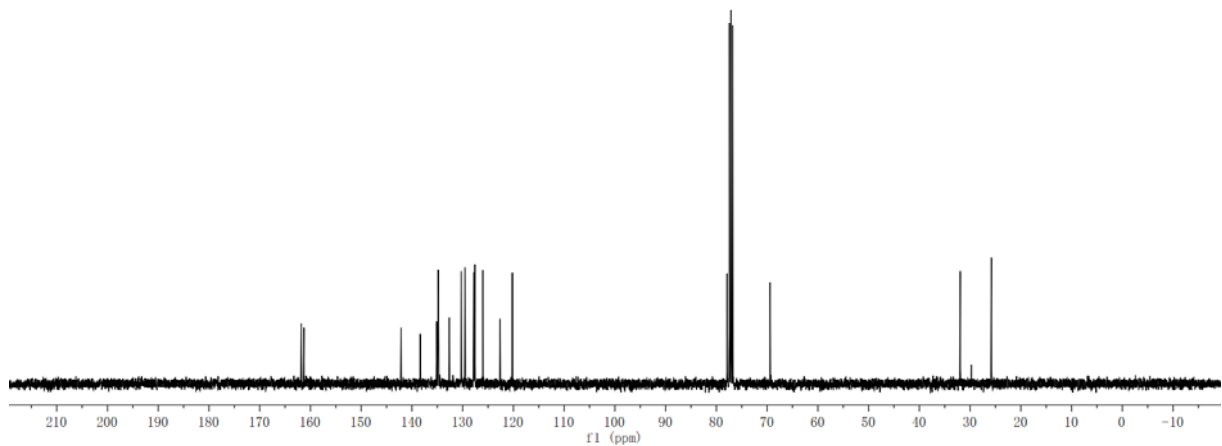

9.5916  
9.5829  
9.5710  
9.5620  
8.2366  
8.2335  
8.2301  
8.2240  
8.0006  
7.9944  
7.9820  
7.9767  
7.7644  
7.7587  
7.7436  
7.7374  
7.6667  
7.6550  
7.6460  
7.6338  
7.5828  
7.5598  
7.5356  
7.4993  
5.9358  
5.9217  
5.9166  
5.9014  
4.3250  
4.3051  
4.2883  
4.2709  
4.1168  
4.0961  
4.0790  
4.0629  
2.6560  
2.6410  
2.6160  
2.5422  
2.2010  
2.1340  
2.0911  
2.0392

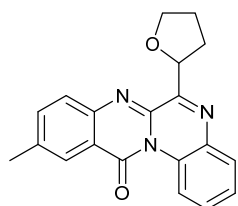

<sup>1</sup>H NMR (400M, CDCl<sub>3</sub>) of **3ka**

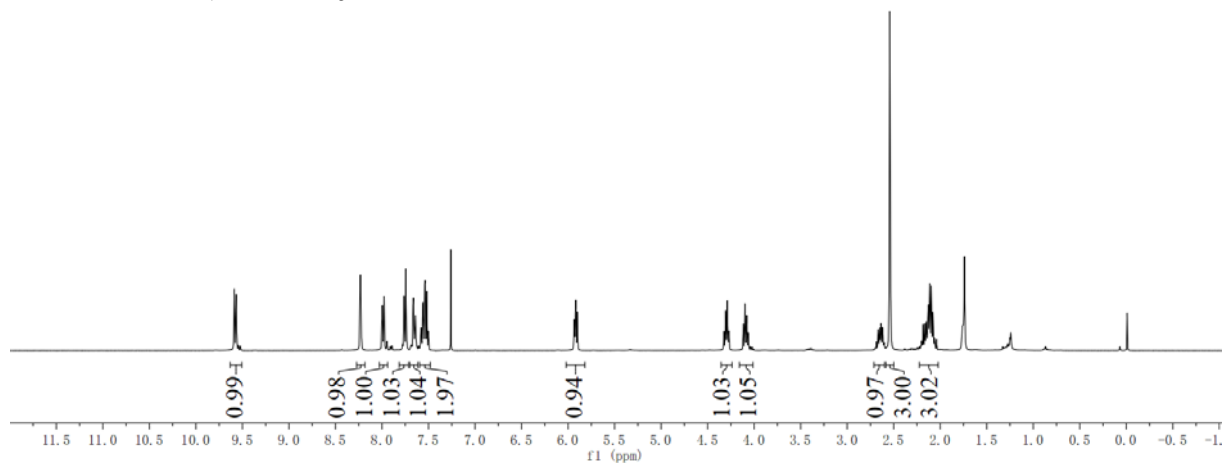

161.92  
161.53  
143.40  
138.58  
137.90  
136.40  
135.03  
130.09  
129.19  
128.27  
127.87  
127.15  
126.59  
121.02  
120.40  
77.38  
77.27  
77.07  
76.75  
69.37

-31.53  
-25.74  
-21.68

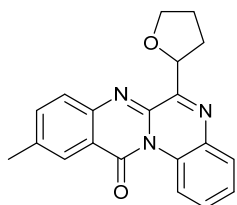

<sup>13</sup>C NMR (101M, CDCl<sub>3</sub>) of **3ka**

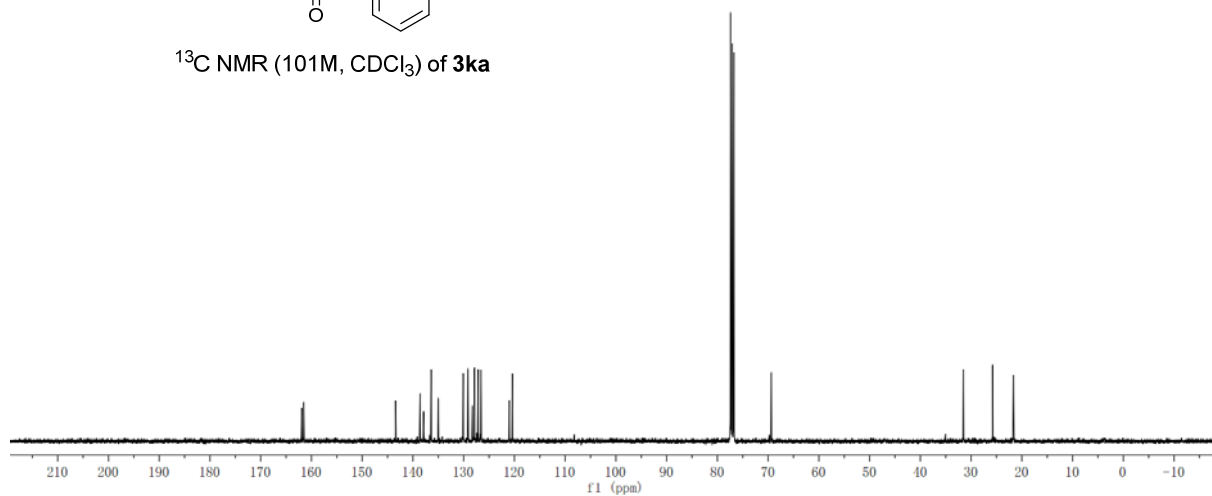



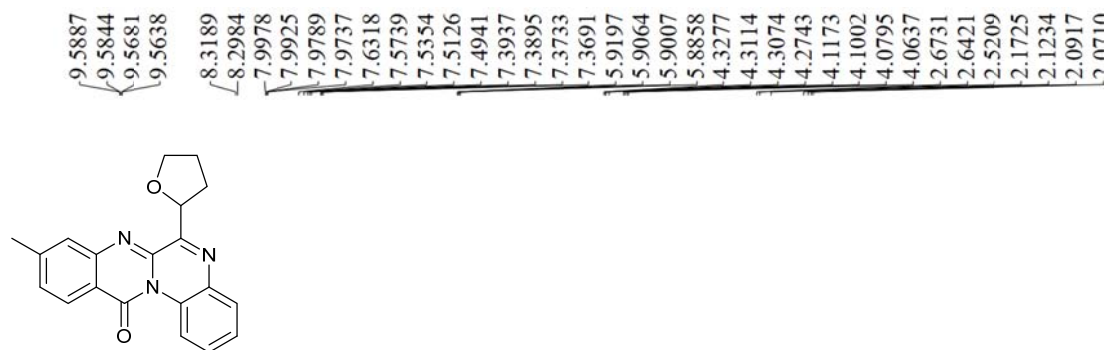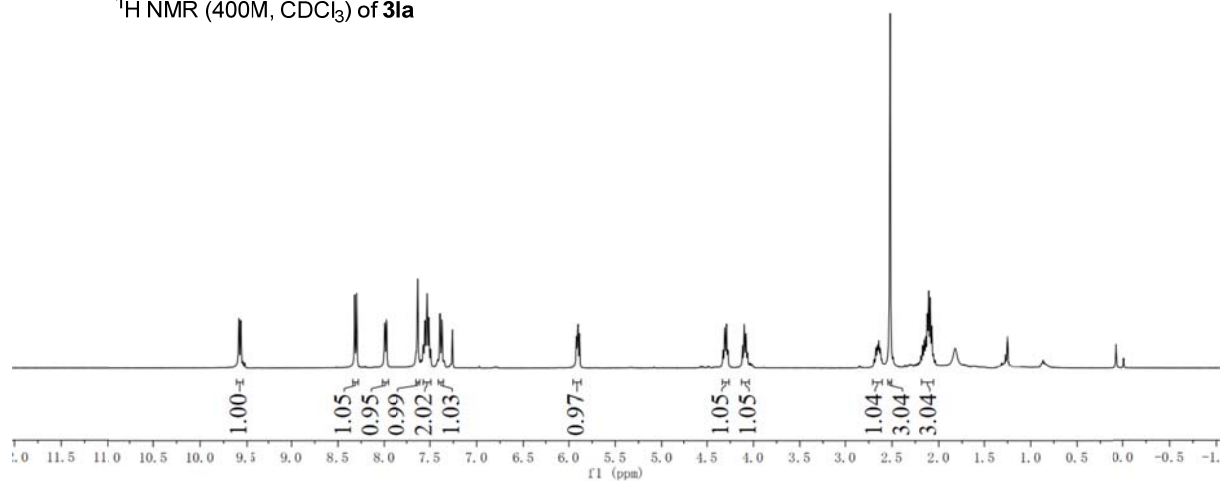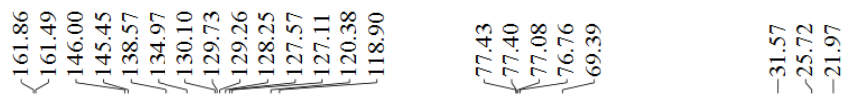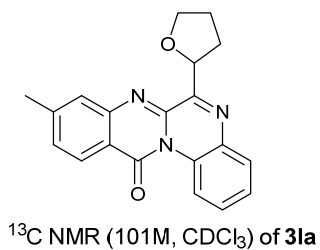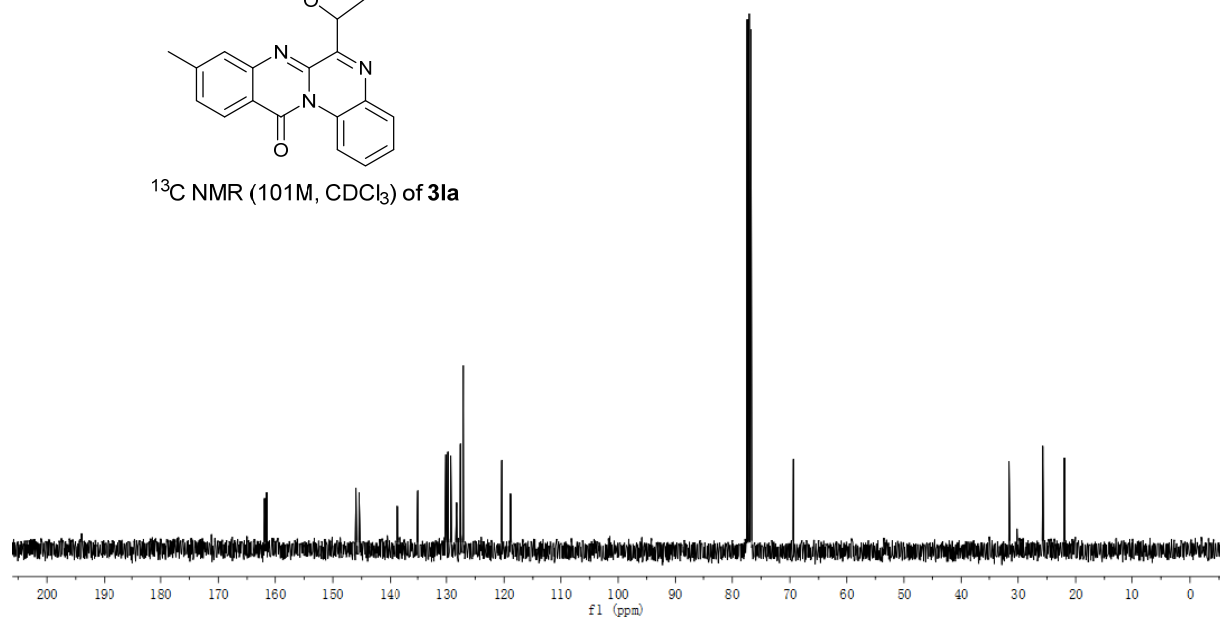

9.5709  
9.5659  
9.5497  
9.5460  
8.2311  
8.2273  
8.2083  
8.2060  
8.0000  
7.9927  
7.9820  
7.9760  
7.6280  
7.6249  
7.6072  
7.6040  
7.5377  
7.5297  
7.5155  
7.4982  
7.4256  
7.4063  
7.3874  
5.9217  
5.9083  
5.9022  
5.8876  
4.2930  
4.1133  
4.0971  
4.0768  
4.0601  
2.7068  
2.6923  
2.6511  
2.1352  
2.1132  
0.0684

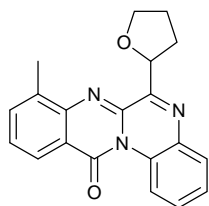

<sup>1</sup>H NMR (400M, CDCl<sub>3</sub>) of 3ma

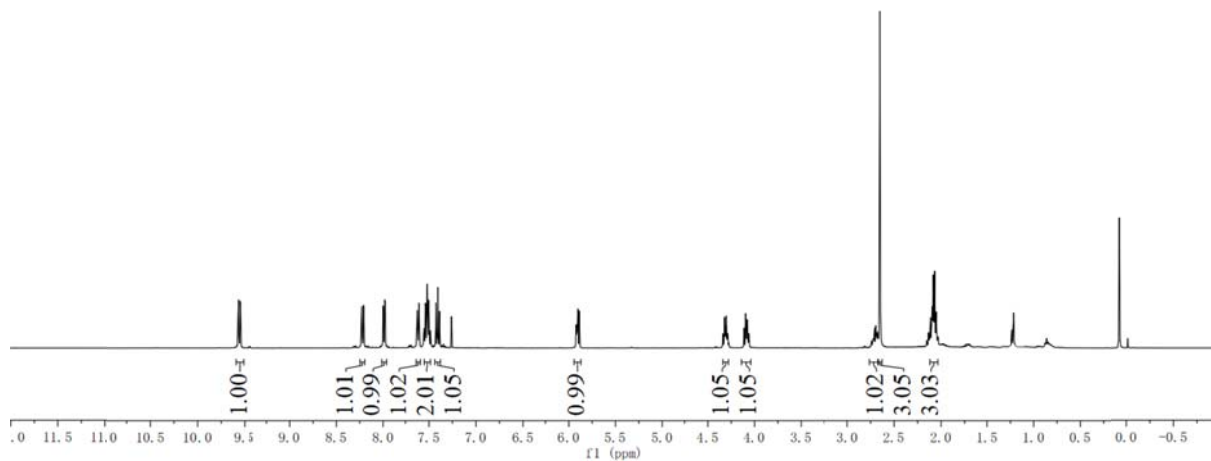

162.10  
161.90  
143.80  
137.23  
136.54  
135.13  
135.03  
130.10  
129.23  
128.09  
127.65  
127.18  
124.91  
121.21  
120.35  
77.55  
77.43  
77.11  
76.79  
69.38  
32.00  
25.64  
17.29

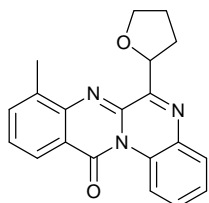

<sup>13</sup>C NMR (101M, CDCl<sub>3</sub>) of 3ma

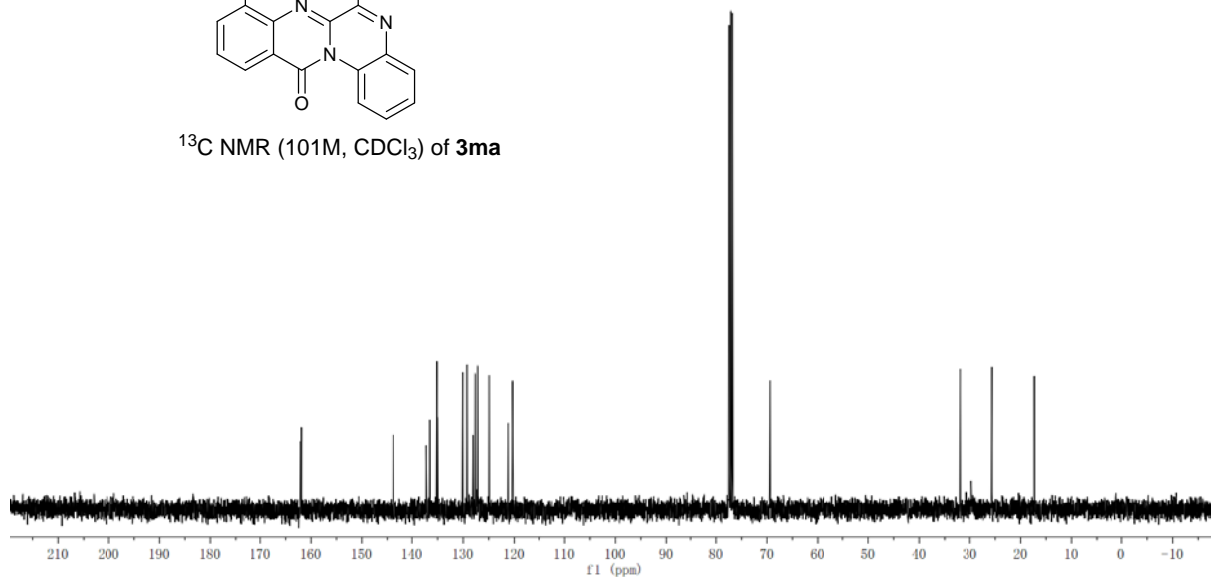

9.6063  
9.6019  
9.5847  
9.5812  
8.1697  
8.1493  
8.0061  
7.9998  
7.9874  
7.9821  
7.5697  
7.5435  
7.5099  
7.4874  
7.3564  
7.3359  
5.9638  
5.9510  
5.9444  
5.9302  
4.3574  
4.3402  
4.3101  
4.3034  
4.1354  
4.1193  
4.0992  
4.0823  
2.7420  
2.7218  
2.7099  
2.6902  
2.5952  
2.4246  
2.1473  
2.0967  
2.0672  
2.0377

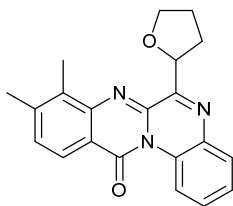

<sup>1</sup>H NMR (400M, CDCl<sub>3</sub>) of 3na

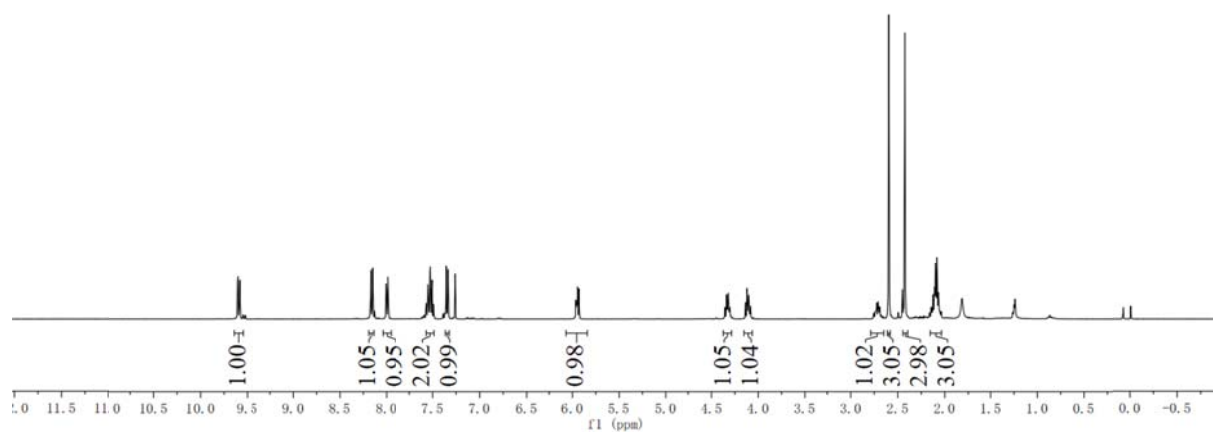

162.19  
161.98  
143.90  
143.52  
137.23  
135.02  
134.36  
130.19  
130.07  
129.18  
128.20  
127.05  
124.09  
120.40  
119.23  
77.56  
77.40  
77.08  
76.77  
69.39  
31.95  
25.63  
20.92  
13.13

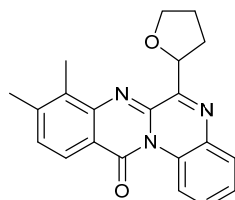

<sup>13</sup>C NMR (101M, CDCl<sub>3</sub>) of 3na

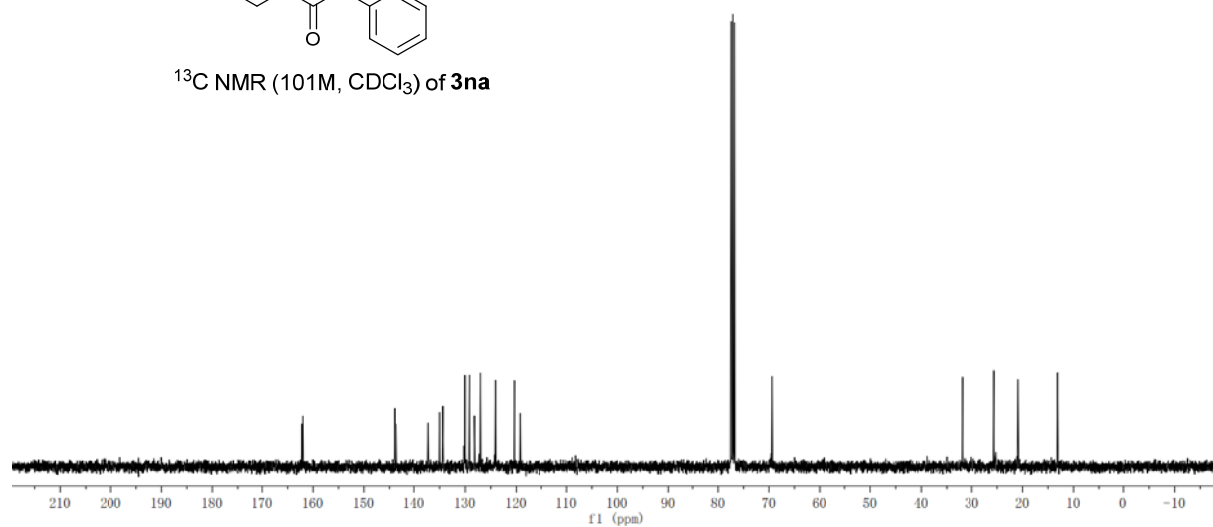

9.5217  
9.5151  
9.5058  
9.4968  
8.1657  
8.1599  
7.9966  
7.9914  
7.9799  
7.9726  
7.5785  
7.5726  
7.5406  
7.5333  
7.5239  
7.5089  
5.9174  
5.9044  
5.8981  
5.8835  
4.3337  
4.3155  
4.2974  
4.2801  
4.1169  
4.0963  
4.0799  
4.0636  
2.7156  
2.6954  
2.6800  
2.6668  
2.6443  
2.1414  
2.1110  
2.0820  
2.0612

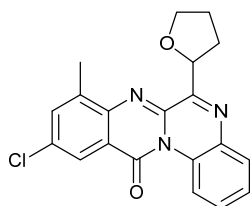

$^1\text{H NMR}$  (400M,  $\text{CDCl}_3$ ) of 30a

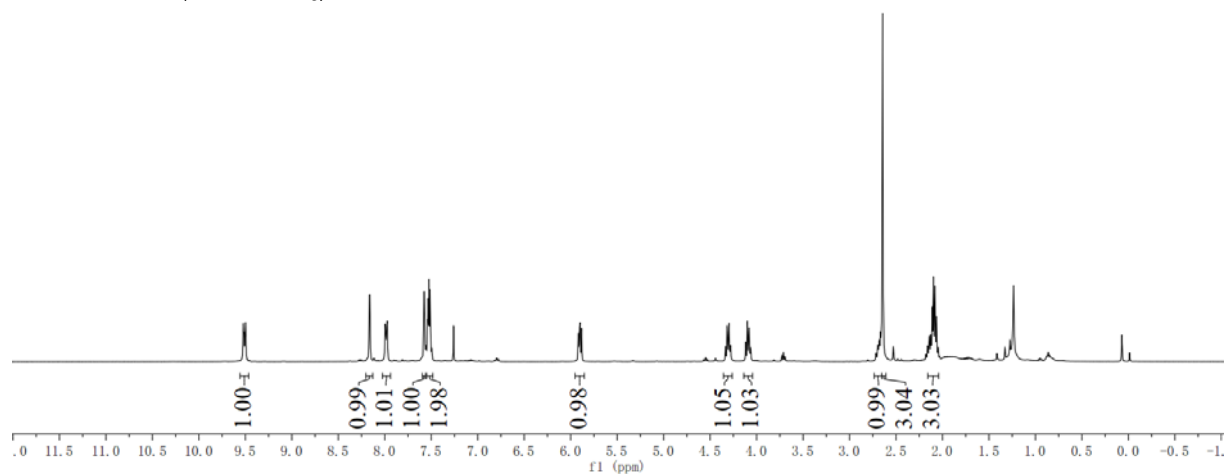

161.66  
161.03  
142.46  
138.83  
137.37  
135.34  
135.10  
133.36  
130.20  
129.40  
127.84  
127.47  
124.10  
122.04  
120.31  
77.44  
77.40  
77.08  
76.77  
69.39  
31.87  
25.65  
17.20

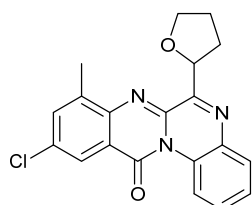

$^{13}\text{C NMR}$  (101M,  $\text{CDCl}_3$ ) of 30a

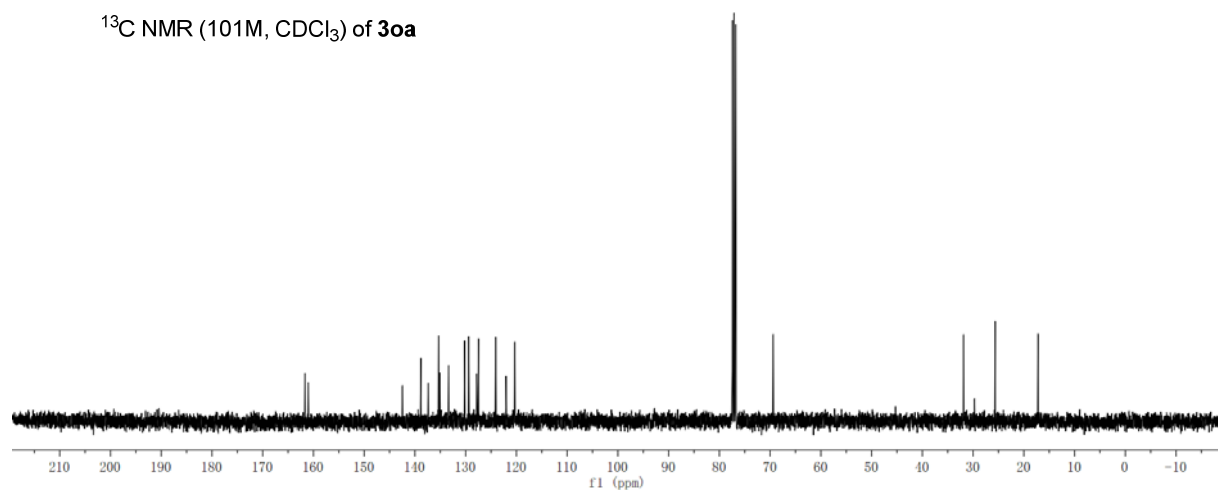

9.4401  
9.4267  
9.4094  
9.3957  
8.4293  
8.4229  
8.4092  
8.4017  
7.9877  
7.9712  
7.9654  
7.9498  
7.8487  
7.8389  
7.6118  
7.5956  
7.5855  
7.5651  
7.2746  
7.2579  
7.2476  
7.2291  
5.9183  
5.9040  
5.8990  
5.8842  
4.3127  
4.2945  
4.2765  
4.2593  
4.1163  
4.0984  
4.0804  
4.0627  
2.6702  
2.6237  
2.1591  
2.1056

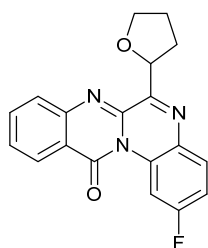

<sup>1</sup>H NMR (400M, CDCl<sub>3</sub>) of **3pa**

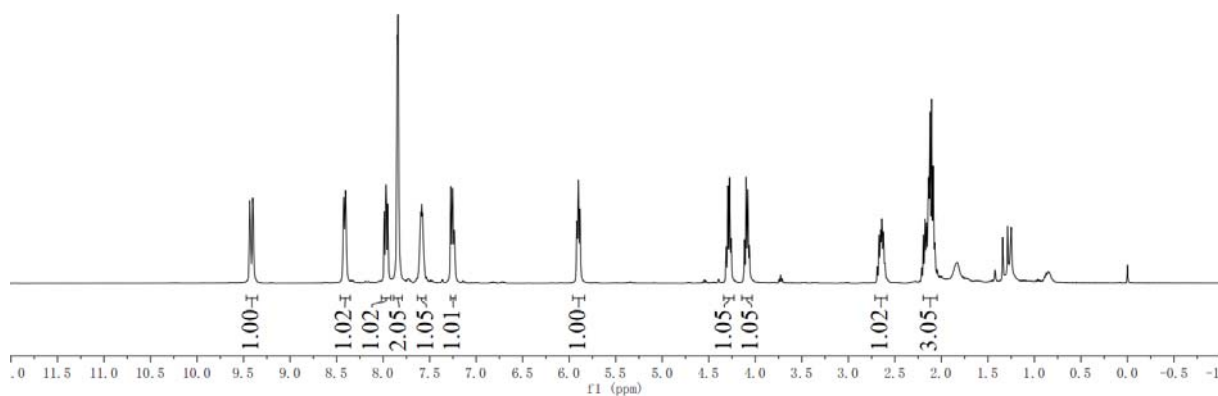

163.228  
161.801  
160.763  
160.585  
145.281  
138.023  
134.994  
131.749  
131.463  
131.365  
128.954  
128.830  
128.154  
128.081  
127.330  
120.963  
114.875  
114.645  
108.240  
107.923  
77.390  
77.271  
77.072  
76.754  
69.378  
-31.456  
-25.748

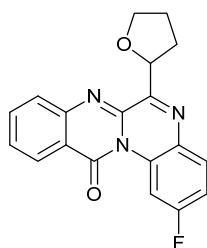

<sup>13</sup>C NMR (101M, CDCl<sub>3</sub>) of **3pa**

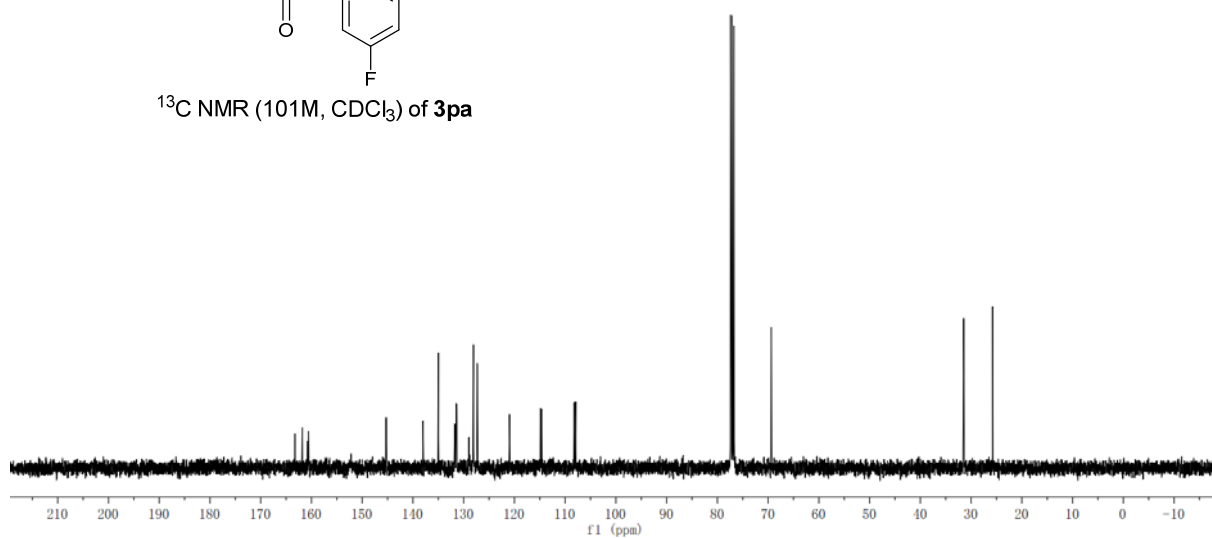

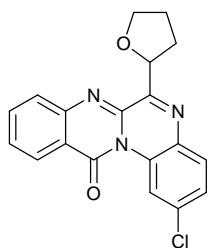

<sup>1</sup>H NMR (400M, CDCl<sub>3</sub>) of **3qa**

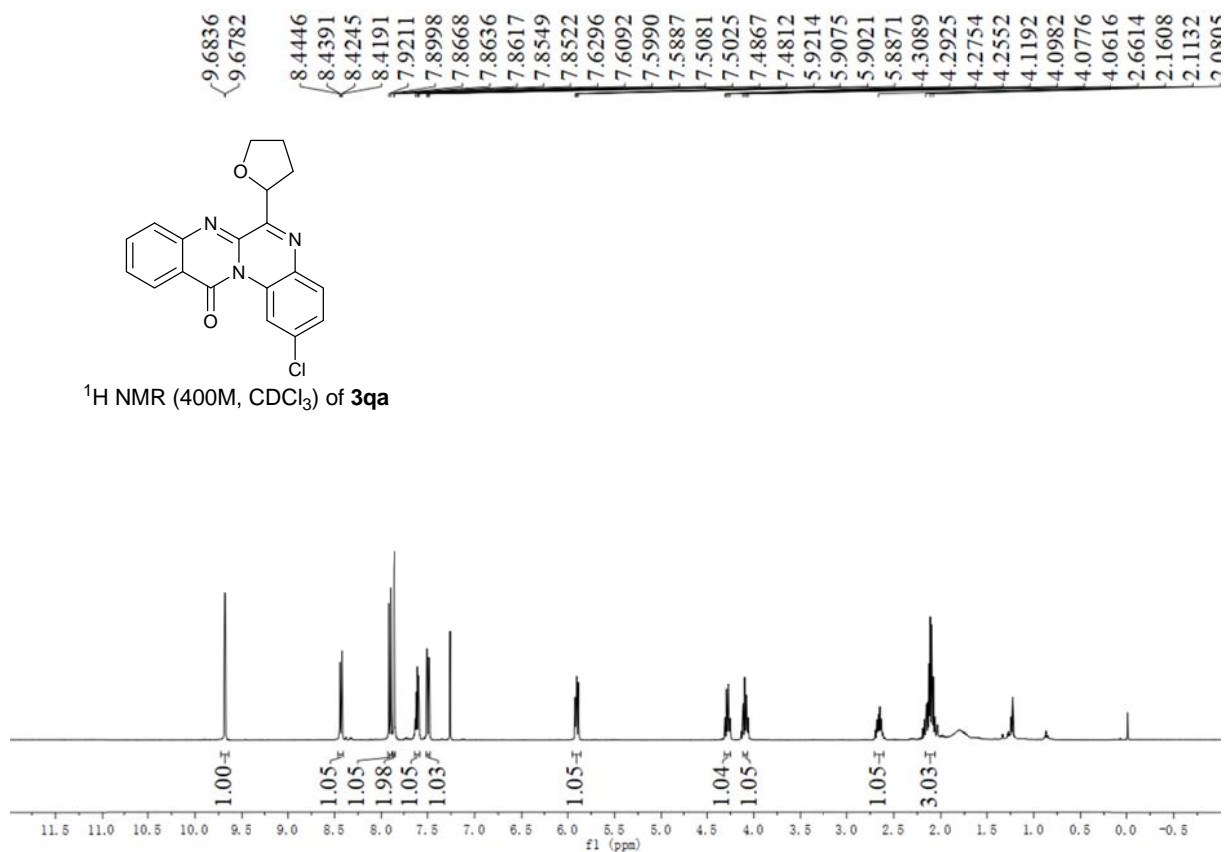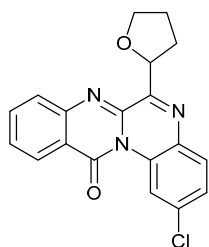

<sup>13</sup>C NMR (101M, CDCl<sub>3</sub>) of **3qa**

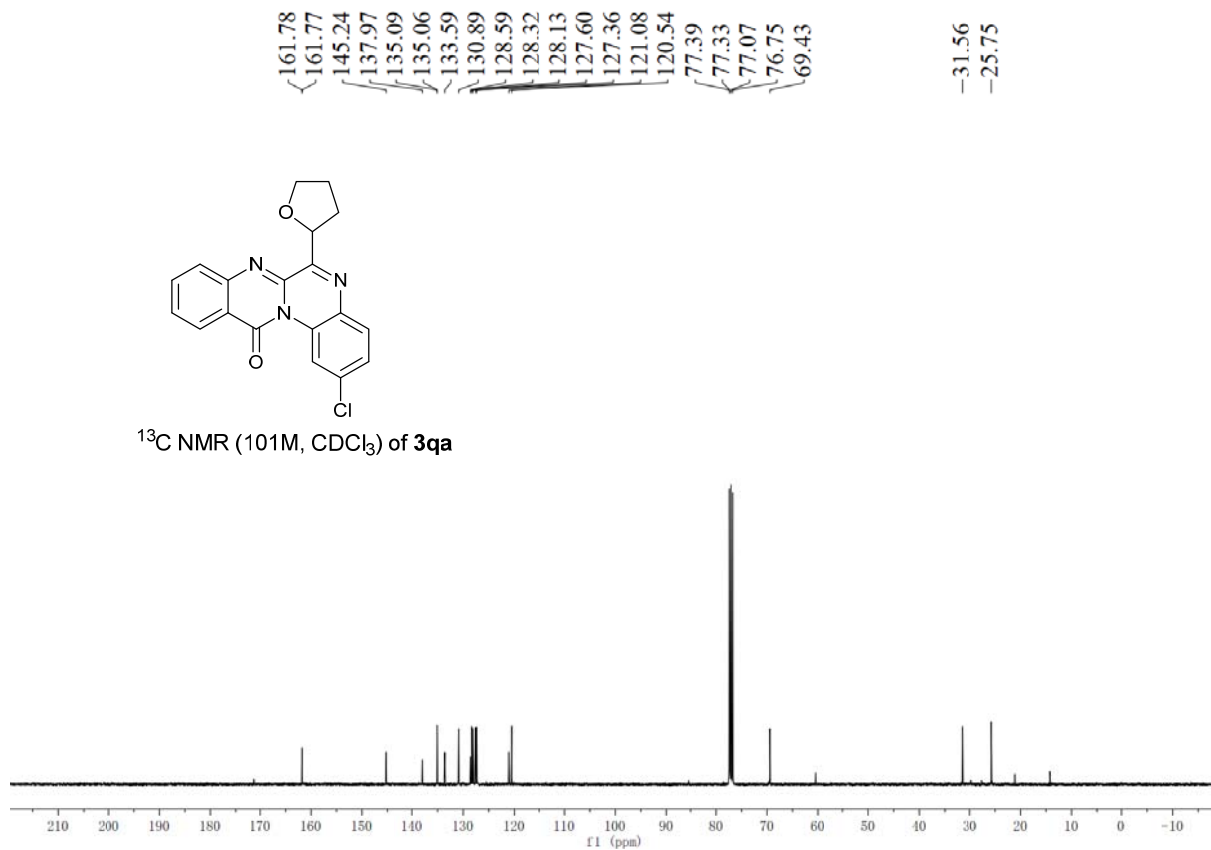

9.8574  
9.8526  
9.8475  
8.4654  
8.4565  
8.4450  
8.4362  
7.8809  
7.8692  
7.8613  
7.8402  
7.6725  
7.6474  
7.6260  
7.6055  
5.9249  
5.9107  
5.9055  
5.8911  
4.3144  
4.2978  
4.2810  
4.2610  
4.1210  
4.1043  
4.0880  
4.0677  
2.7020  
2.6819  
2.6571  
2.6330  
2.1947  
2.1506  
2.1168  
2.0638

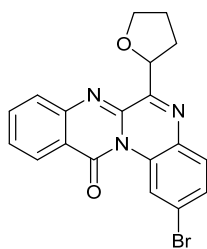

$^1\text{H NMR}$  (400M,  $\text{CDCl}_3$ ) of **3ra**

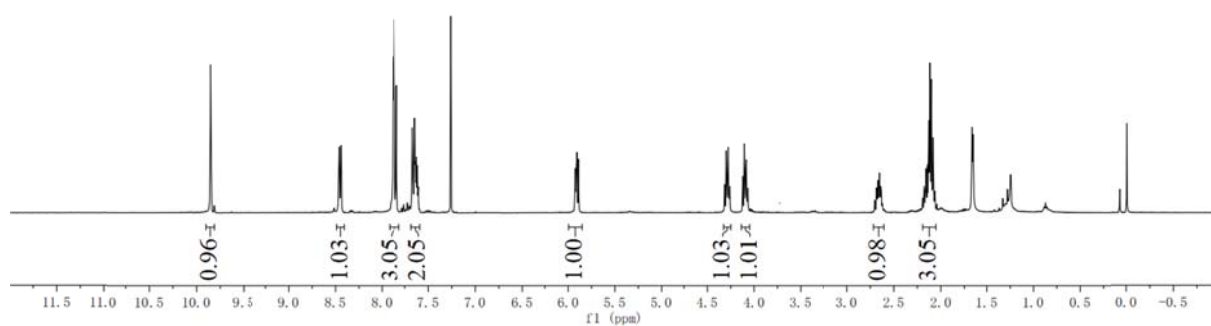

162.02  
161.78  
145.26  
137.97  
135.09  
133.96  
131.14  
130.57  
128.75  
128.37  
128.16  
127.39  
123.39  
123.27  
121.12  
77.37  
77.26  
77.06  
76.74  
69.45

-31.55  
-25.75

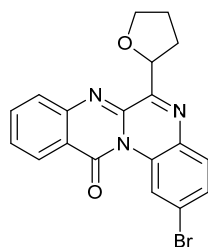

$^{13}\text{C NMR}$  (101M,  $\text{CDCl}_3$ ) of **3ra**

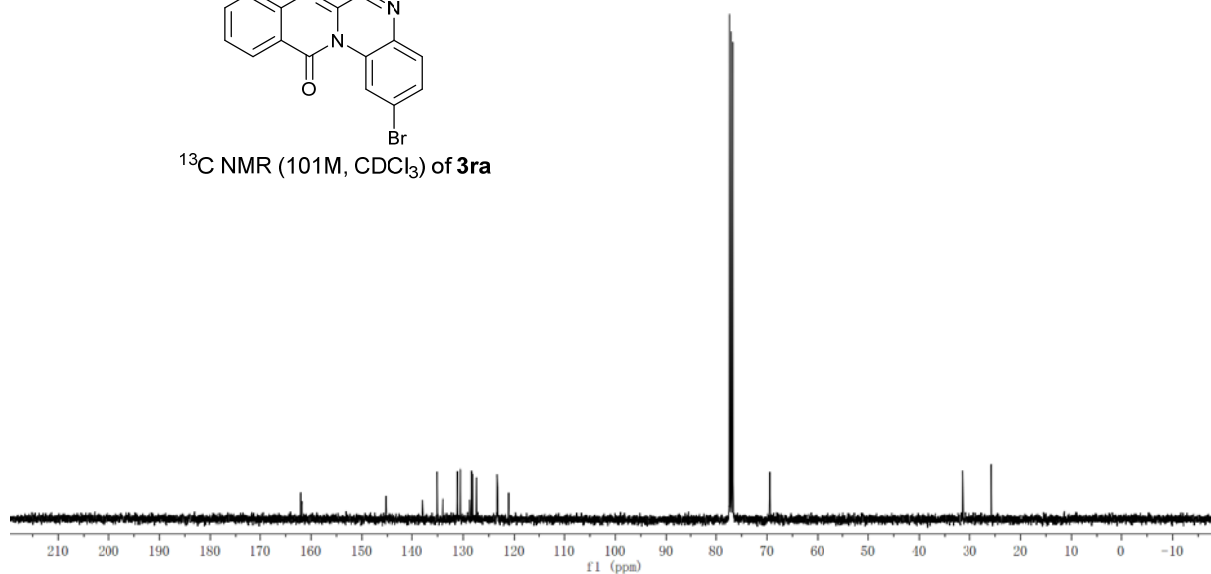

9.3707  
9.3639  
9.3484  
9.3415  
8.4506  
8.4419  
8.4302  
8.4242  
7.8897  
7.8697  
7.8588  
7.8384  
7.6304  
7.6045  
7.5954  
7.5436  
7.5284  
7.4854  
7.4826  
7.3072  
7.2867  
7.2842  
7.2816  
5.9962  
5.9828  
5.9767  
5.9625  
4.3260  
4.3090  
4.3063  
4.2711  
4.1293  
4.1100  
4.0953  
4.0759  
2.5981  
2.5513  
2.5310  
2.3168  
2.2965  
2.2659  
2.2352  
2.1405  
2.1010

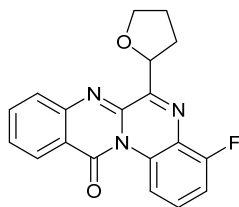

$^1\text{H NMR}$  (400M,  $\text{CDCl}_3$ ) of **3sa**

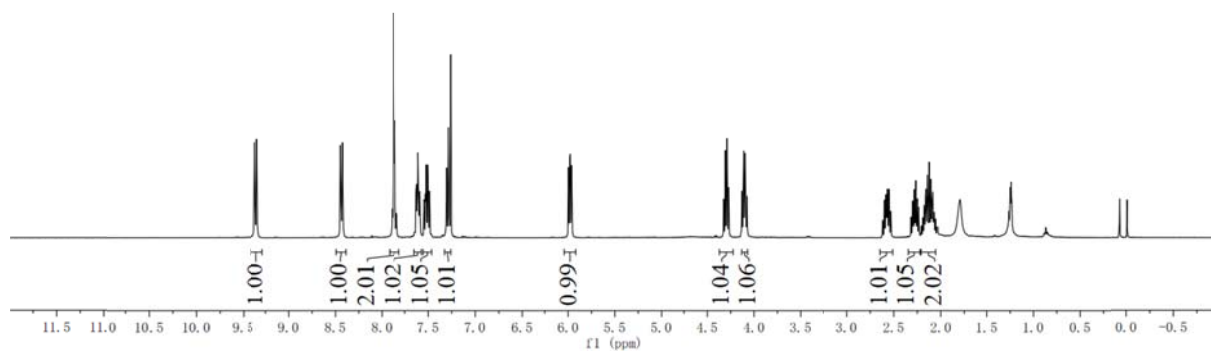

161.890  
161.870  
161.813  
159.061  
156.517  
145.295  
138.206  
135.008  
129.492  
129.403  
129.315  
128.299  
128.183  
127.368  
125.145  
125.017  
121.289  
115.977  
115.934  
113.865  
113.674  
77.392  
77.253  
77.075  
76.756  
69.439  
-31.080  
-25.751

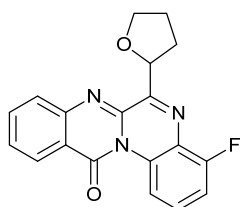

$^{13}\text{C NMR}$  (101M,  $\text{CDCl}_3$ ) of **3sa**

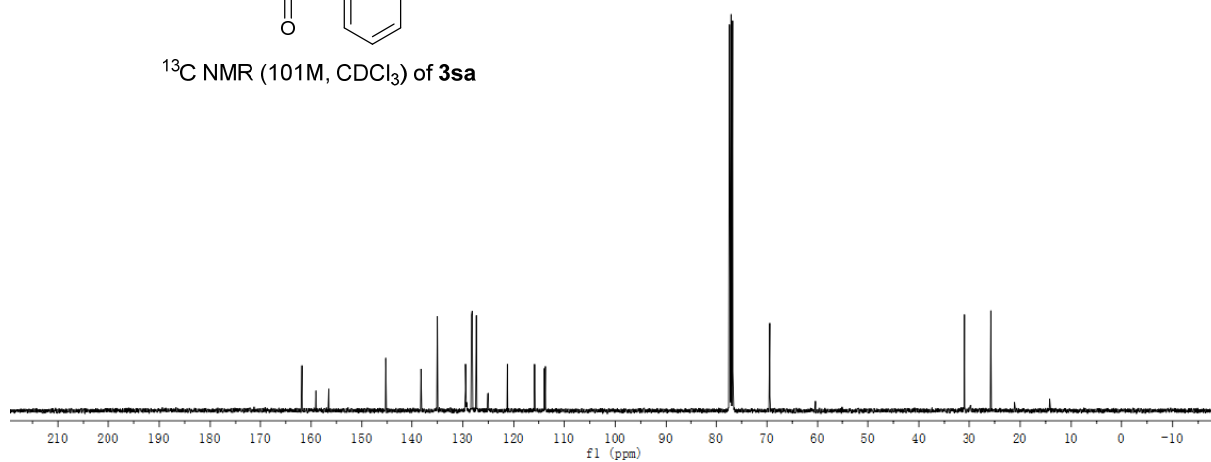



9.4764  
9.4733  
9.4545  
9.4513  
8.4262  
8.4209  
8.4059  
8.4006  
7.8938  
7.8732  
7.8515  
7.8274  
7.6175  
7.5998  
7.5976  
7.5747  
7.4729  
7.4530  
7.4508  
7.4310  
6.0831  
6.0721  
6.0630  
6.0519  
4.3698  
4.3540  
4.3344  
4.3149  
4.1465  
4.1273  
4.1124  
4.0929  
2.5265  
2.4949  
2.4533  
2.3990  
2.3788  
2.3542  
2.3227  
2.2232  
2.1994  
2.1421  
2.0963  
2.0799

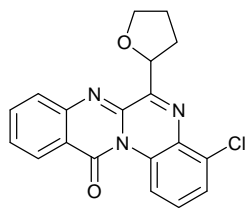

$^1\text{H}$  NMR (400M,  $\text{CDCl}_3$ ) of **3ta**

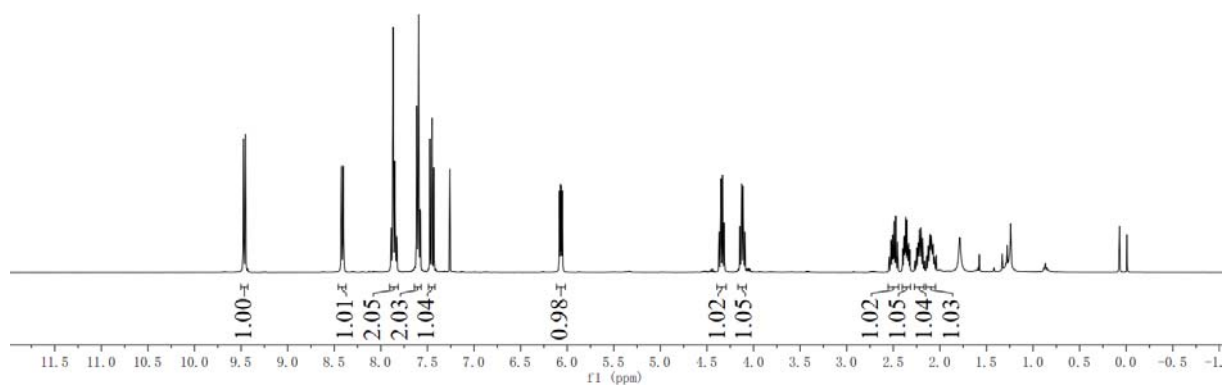

162.22  
161.87  
145.38  
138.10  
135.00  
134.48  
131.92  
129.62  
129.13  
128.28  
128.21  
128.16  
127.36  
121.16  
119.04  
77.40  
77.08  
76.82  
76.76  
69.43  
-30.67  
-25.51

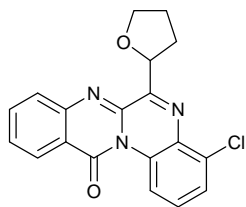

$^{13}\text{C}$  NMR (101M,  $\text{CDCl}_3$ ) of **3ta**

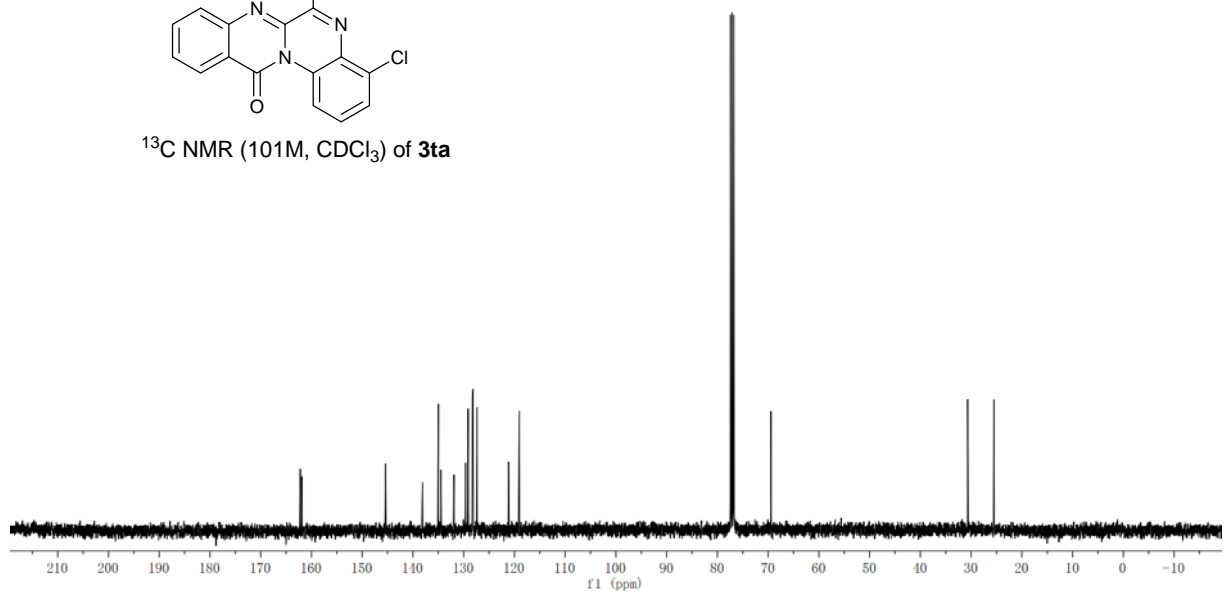

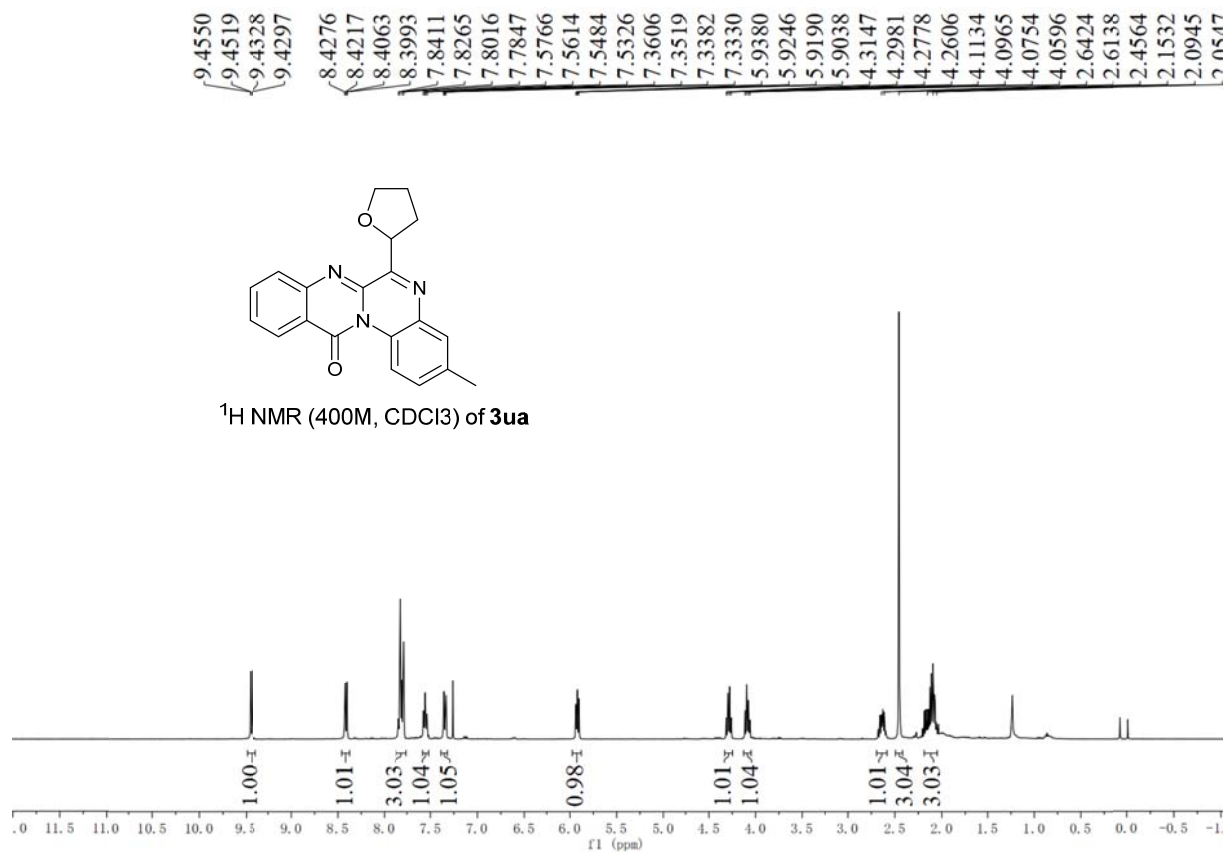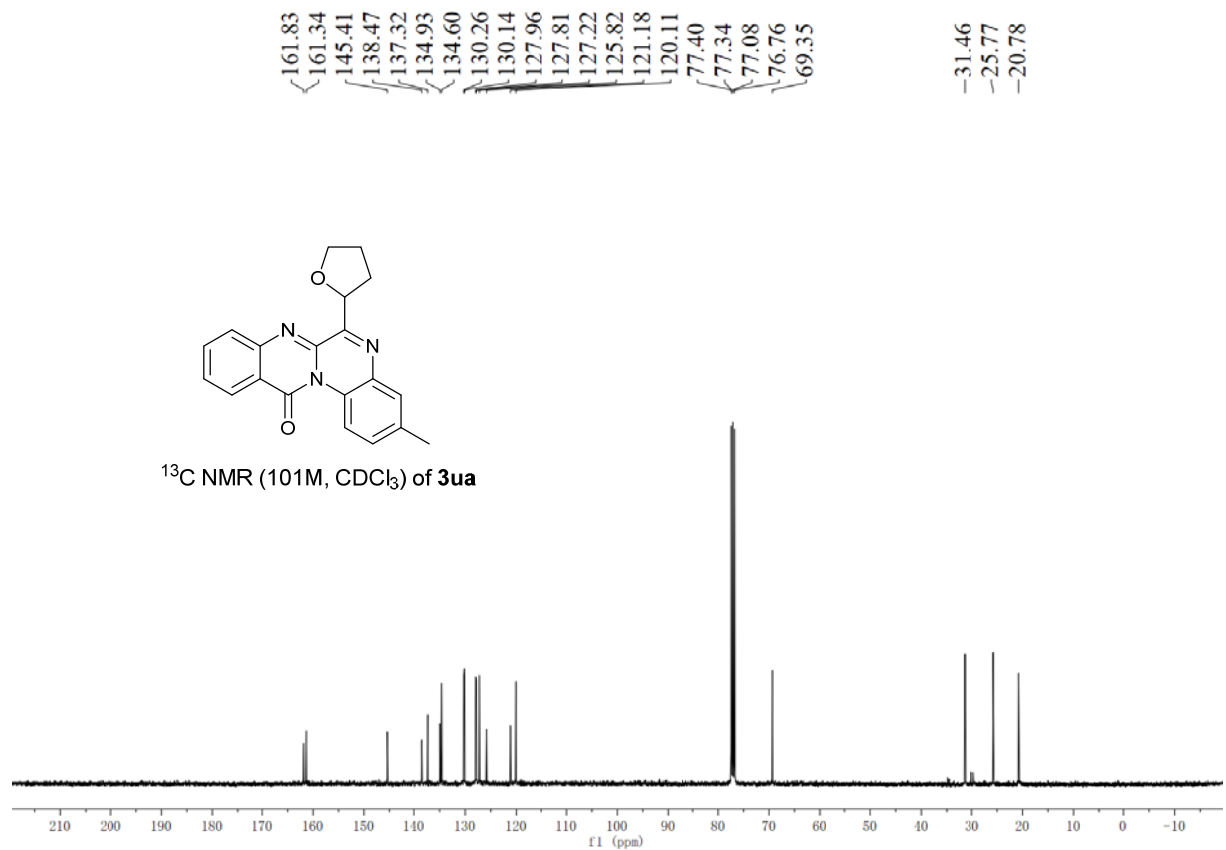

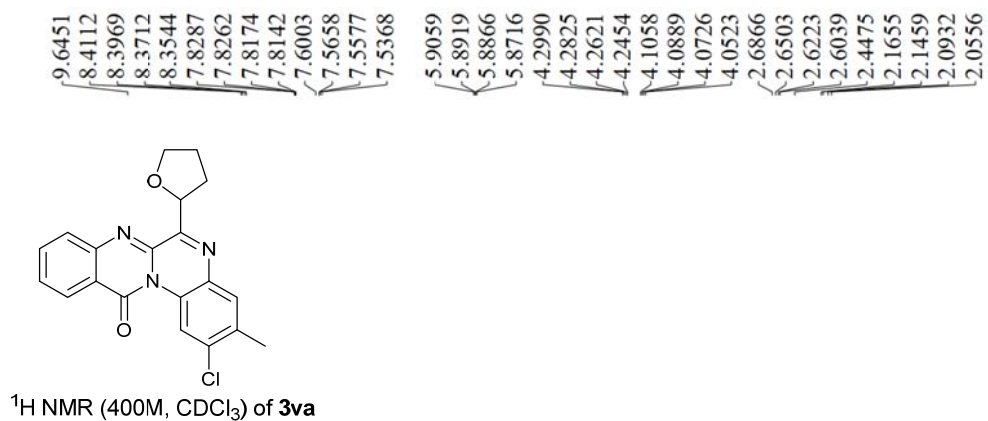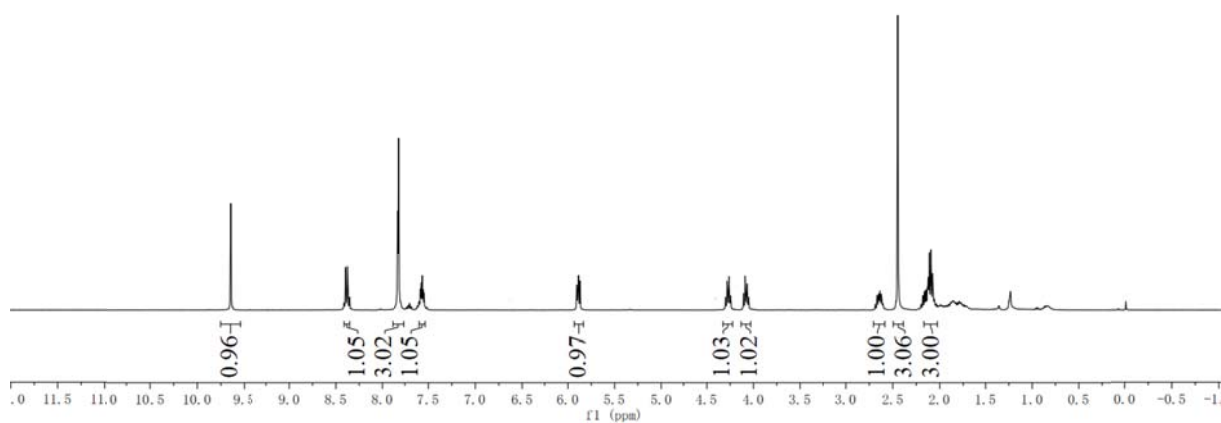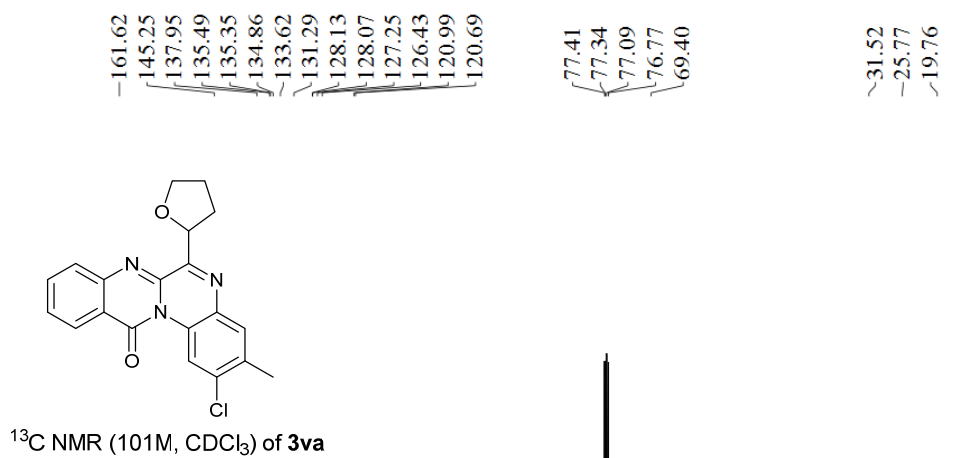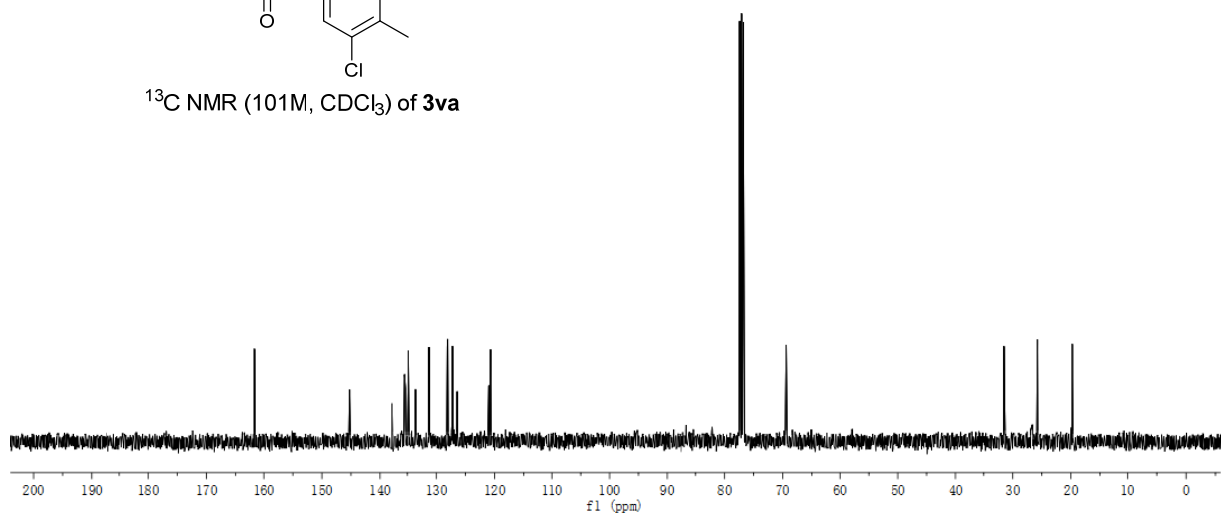

9.5722  
9.5679  
9.5519  
9.5476  
8.4636  
8.4580  
8.4432  
8.4384  
8.1121  
8.1057  
8.0934  
8.0880  
7.8712  
7.8594  
7.8507  
7.6151  
7.5742  
7.5478  
7.5112  
5.5825  
5.5773  
5.5555  
5.5505  
4.3688  
4.3579  
4.3408  
4.3251  
3.8365  
3.8070  
3.8011  
3.7720  
2.2910  
2.2809  
2.2598  
2.2492  
2.0368  
2.0224  
1.9368  
1.9089  
1.8934  
1.8584  
1.7911  
1.7599  
1.7329

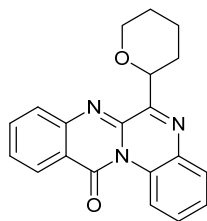

<sup>1</sup>H NMR (400M, CDCl<sub>3</sub>) of **3ab**

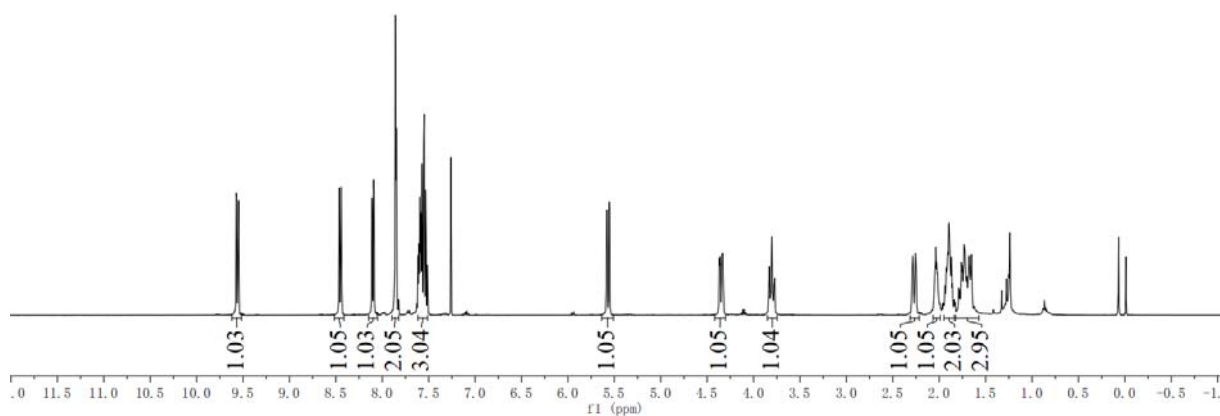

161.93  
160.70  
145.27  
138.02  
135.08  
134.76  
130.24  
129.41  
127.98  
127.93  
127.90  
127.32  
127.27  
121.20  
120.26  
77.43  
77.11  
76.79  
76.42  
69.56  
31.04  
25.72  
23.88

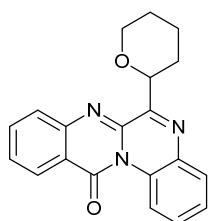

<sup>13</sup>C NMR (101M, CDCl<sub>3</sub>) of **3ab**

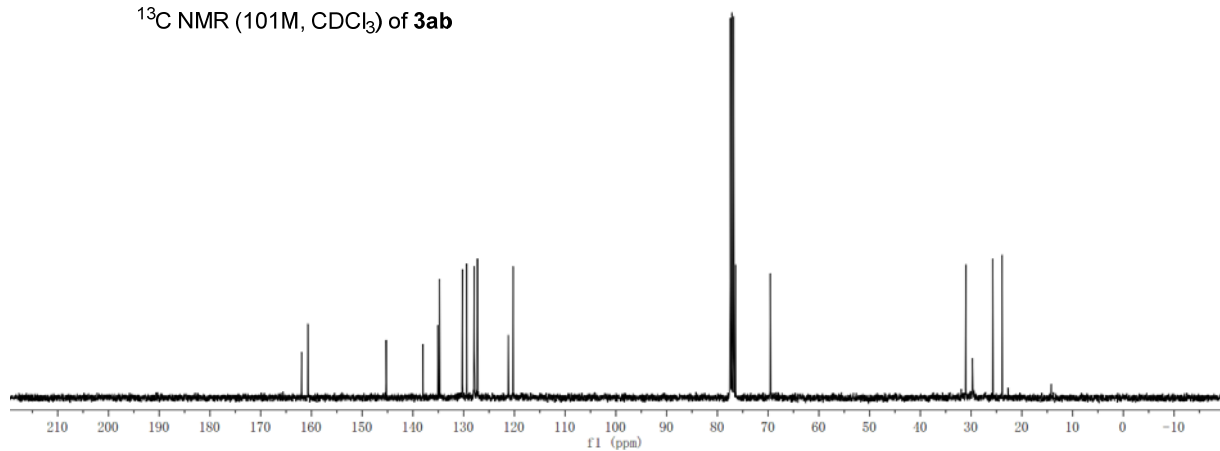

9.5797  
9.5757  
9.5586  
9.5545  
8.4516  
8.4454  
8.4311  
8.4260  
8.0927  
8.0878  
8.0735  
8.0685  
7.8693  
7.8583  
7.6236  
7.5873  
7.5406  
7.5222  
5.8710  
5.8644  
5.8472  
5.8407  
4.4795  
4.4730  
4.4518  
4.4452  
4.1964  
4.1747  
4.1681  
4.1196  
4.1082  
4.0551  
3.9208  
3.8871  
3.7506  
3.7270  
3.7229  
2.6001

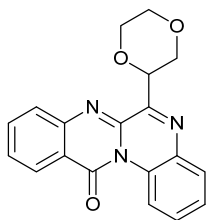

$^1\text{H}$  NMR (400M,  $\text{CDCl}_3$ ) of 3ac

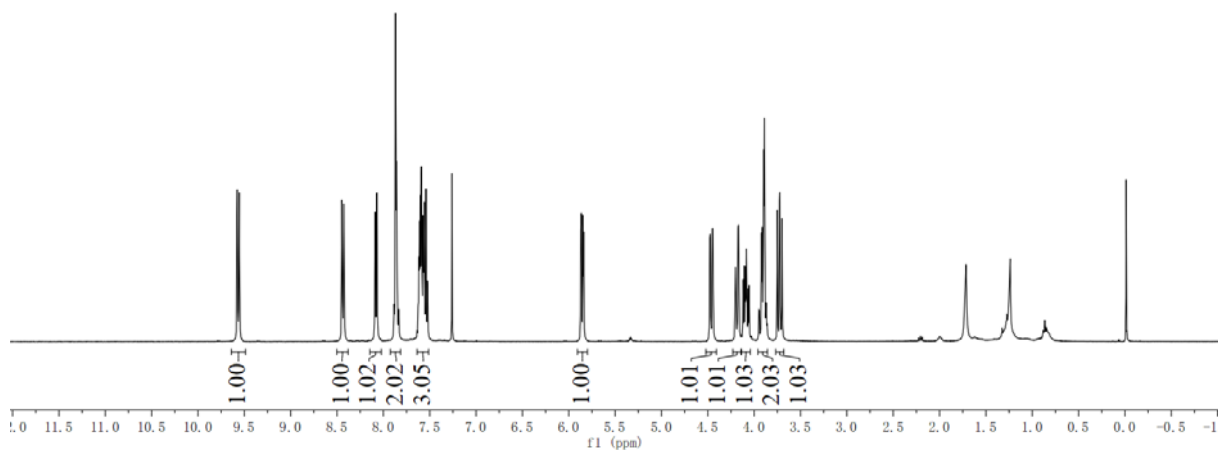

161.79  
157.05  
145.18  
138.09  
135.00  
134.92  
130.34  
129.97  
128.26  
127.99  
127.43  
127.37  
121.24  
120.36  
77.39  
77.07  
76.75  
74.91  
70.37  
67.68  
66.45

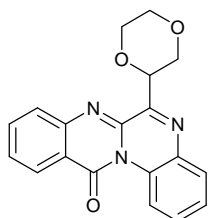

$^{13}\text{C}$  NMR (101M,  $\text{CDCl}_3$ ) of 3ac

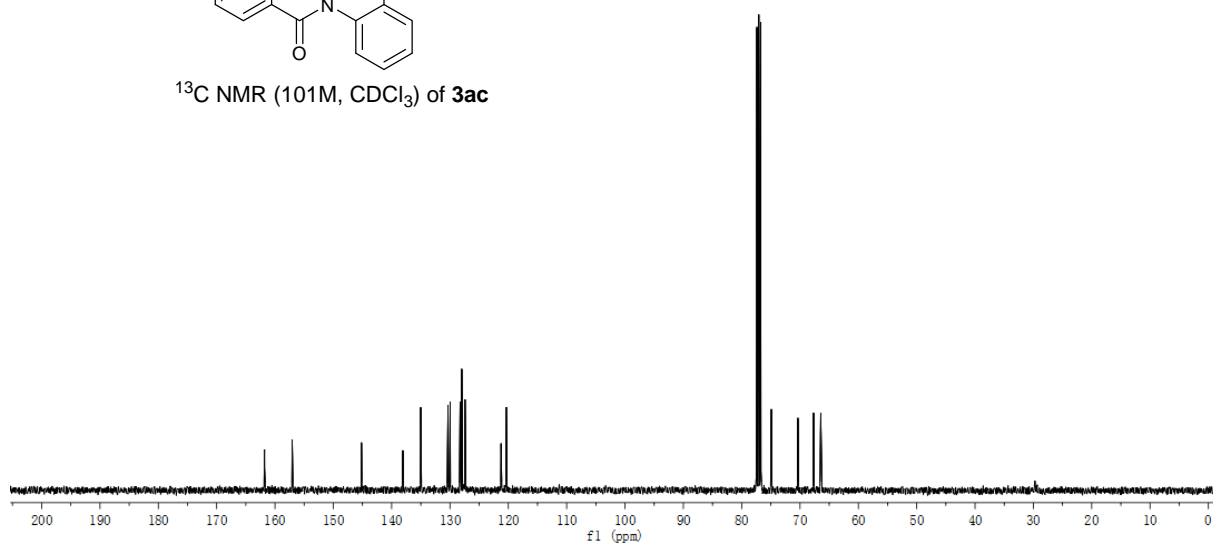

9.3226  
9.3183  
9.3023  
9.2980  
8.0954  
8.0902  
8.0765  
8.0713  
7.7962  
7.7927  
7.7755  
7.7722  
7.7352  
7.7157  
7.6955  
7.6147  
7.5919  
7.5684  
7.5312  
5.8205  
5.8139  
5.7967  
5.7901  
4.4394  
4.4328  
4.4116  
4.4051  
4.2024  
4.1925  
4.1705  
4.1642  
4.1096  
4.0866  
4.0690  
4.0451  
3.9463  
3.9101  
3.8869  
3.8595  
3.7517  
3.7281  
3.7239  
3.7002

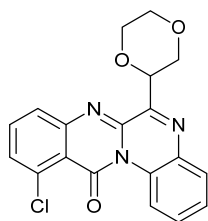

$^1\text{H}$  NMR (400M,  $\text{CDCl}_3$ ) of **3cc**

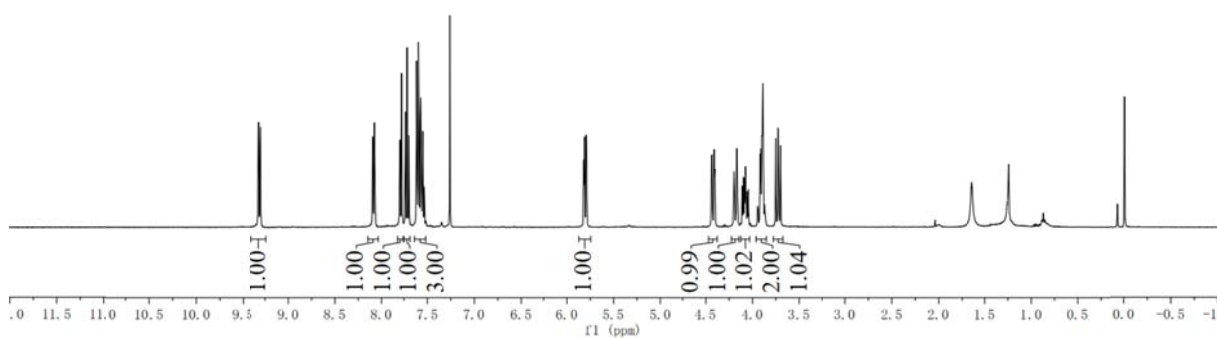

159.64  
156.65  
147.67  
138.53  
135.03  
134.43  
134.26  
130.71  
130.45  
130.06  
127.61  
127.19  
119.99  
118.23  
77.37  
77.06  
76.74  
74.66  
70.27  
67.68  
66.44

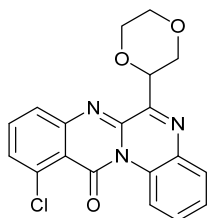

$^{13}\text{C}$  NMR (101M,  $\text{CDCl}_3$ ) of **3cc**

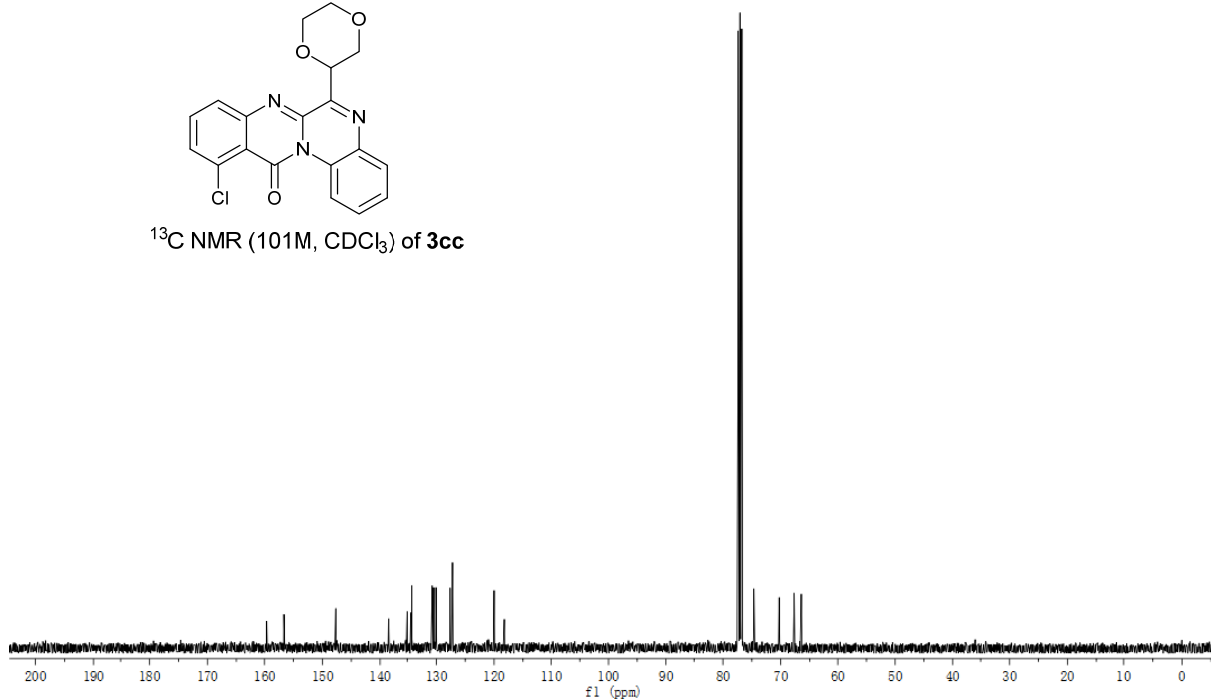

9.5567  
9.5526  
9.5358  
9.5318  
8.2198  
8.2138  
8.0899  
8.0847  
8.0710  
8.0658  
7.6439  
7.6379  
7.5765  
7.5355  
5.7996  
5.7931  
5.7760  
5.7695  
4.4711  
4.4646  
4.4433  
4.4369  
4.2080  
4.2024  
4.1807  
4.1744  
4.1093  
4.0979  
4.0743  
4.0449  
3.9488  
3.8993  
3.8885  
3.8695  
3.8021  
3.7784  
3.7743  
3.7505  
2.7033

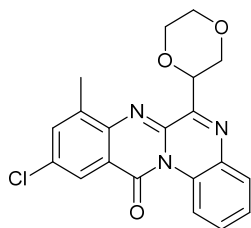

$^1\text{H}$  NMR (400M,  $\text{CDCl}_3$ ) of **3oc**

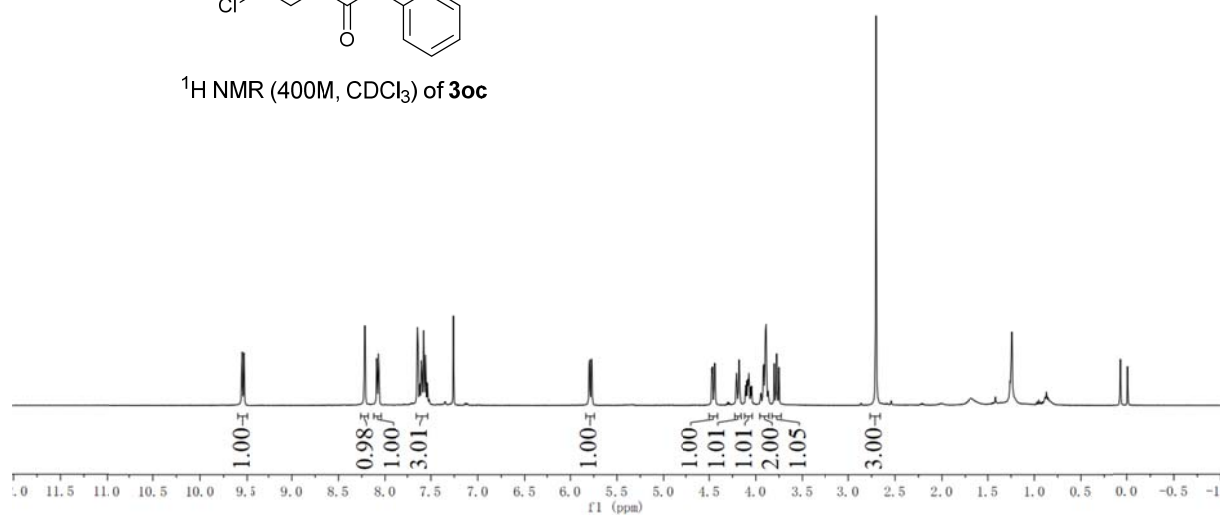

160.98  
157.04  
142.33  
138.92  
137.14  
135.60  
135.04  
133.74  
130.42  
130.13  
127.77  
127.67  
124.22  
122.10  
120.38  
77.38  
77.06  
76.74  
75.12  
70.36  
67.73  
66.46

-17.26

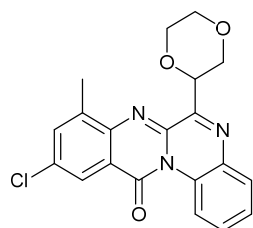

$^{13}\text{C}$  NMR (101M,  $\text{CDCl}_3$ ) of **3oc**

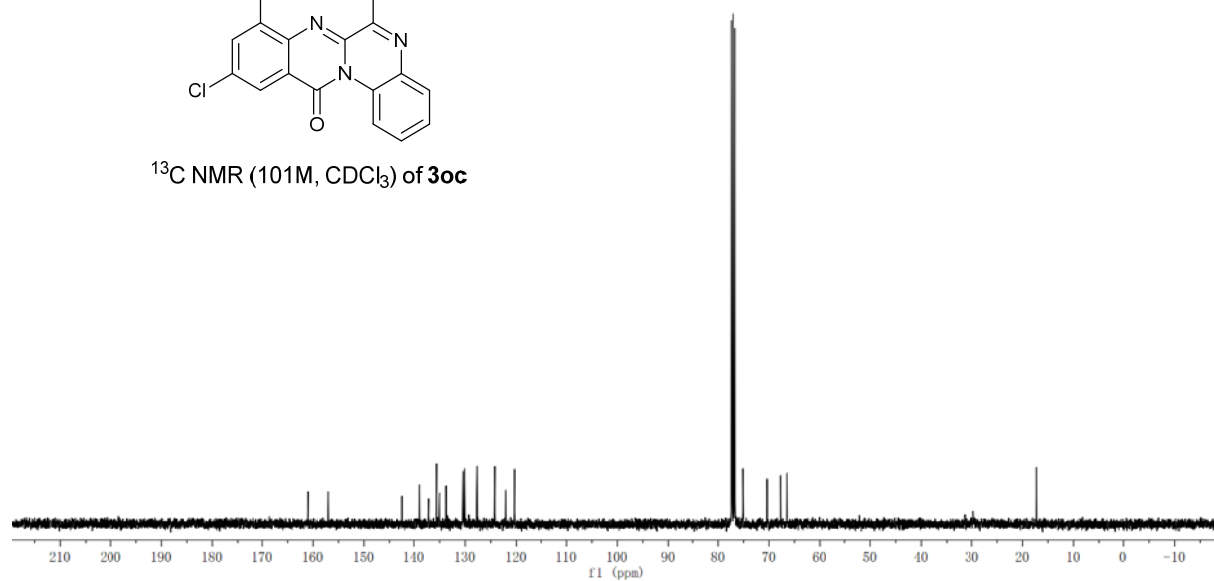

9.5289  
9.5245  
9.5076  
9.5038  
8.4711  
8.4667  
8.4490  
8.0499  
8.0447  
8.0323  
8.0268  
7.8791  
7.8514  
7.8458  
7.8430  
7.6251  
7.5791  
7.5391  
7.5047  
4.1801  
4.1031  
4.0839  
4.0645  
2.7884  
2.7690  
2.7360  
2.7172  
2.4919  
2.4716  
2.4567  
2.4228  
2.0937  
2.0743  
1.9445  
1.9162  
1.9067  
1.8827  
1.8657

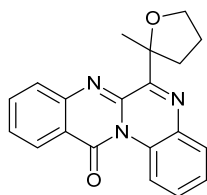

<sup>1</sup>H NMR (400M, CDCl<sub>3</sub>) of **3ad**

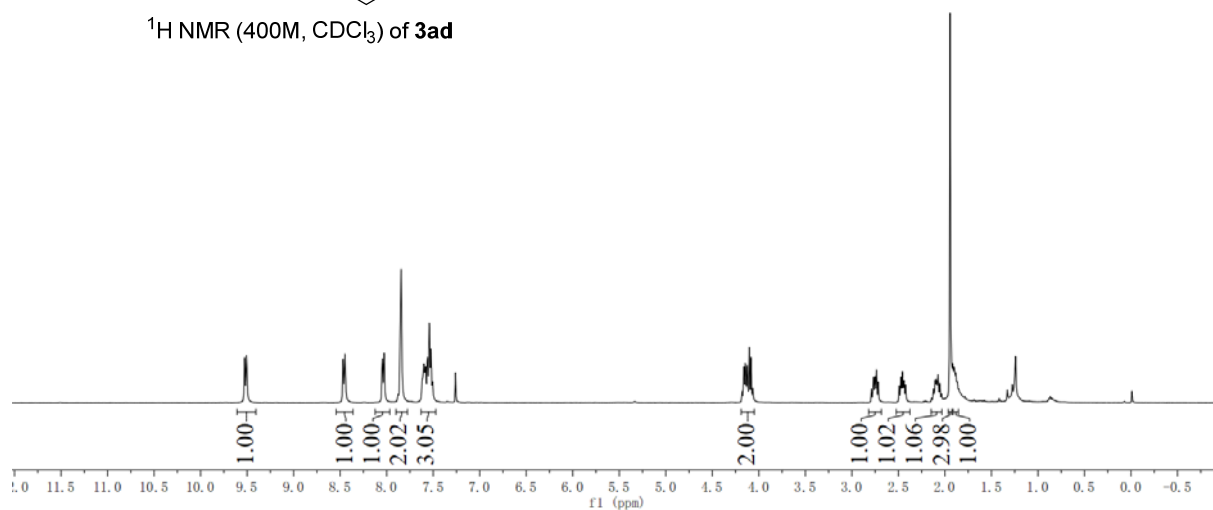

163.42  
162.10  
144.90  
137.73  
134.76  
134.74  
130.36  
129.27  
128.13  
127.99  
127.84  
127.27  
127.18  
121.14  
120.12  
86.06  
77.43  
77.11  
76.79  
67.65  
-37.85  
26.56  
25.64

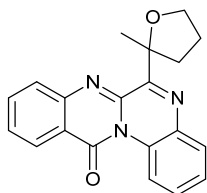

<sup>13</sup>C NMR (101M, CDCl<sub>3</sub>) of **3ad**

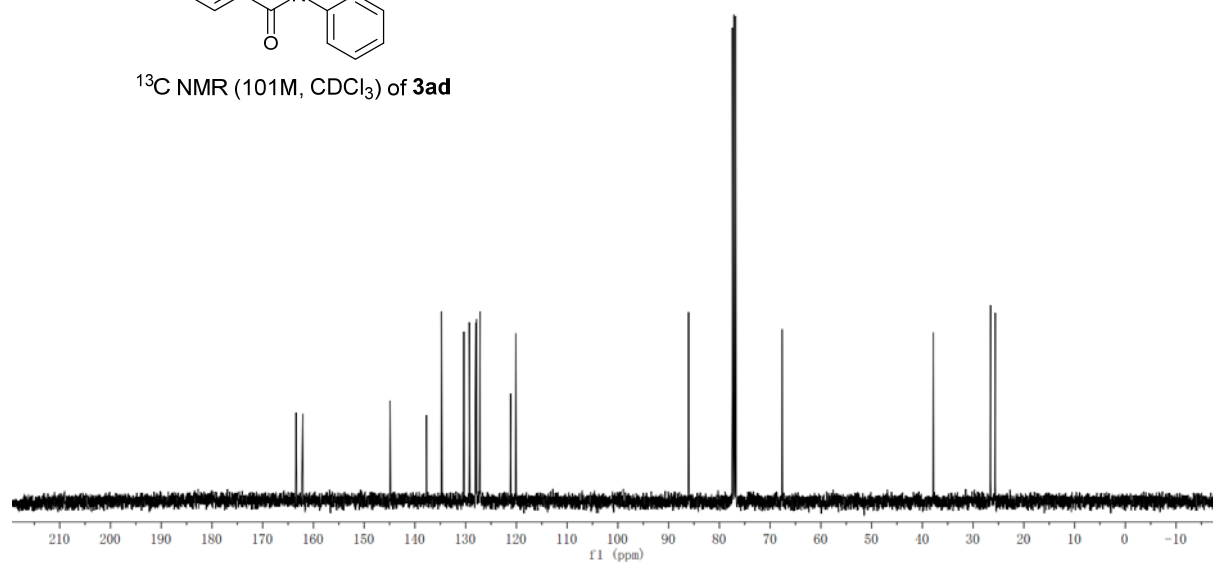



9.6202  
 9.6163  
 9.5991  
 9.5952  
 8.4993  
 8.4937  
 8.4788  
 8.4737  
 8.0870  
 8.0820  
 8.0680  
 8.0630  
 7.9123  
 7.9004  
 7.8977  
 7.8633  
 7.6567  
 7.6364  
 7.6147  
 7.5474  
 5.7755  
 5.7633  
 5.7506  
 3.9493  
 3.9368  
 3.5791  
 3.4720

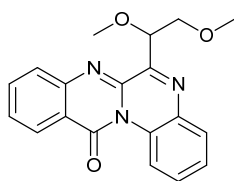

<sup>1</sup>H NMR (400M, CDCl<sub>3</sub>) of **3ae**

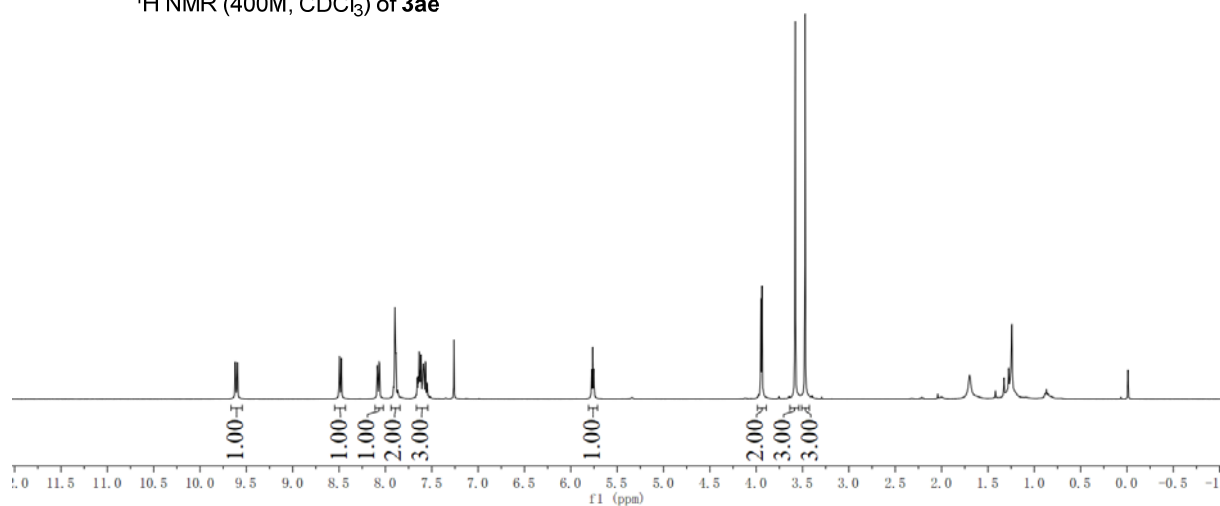

161.99  
 158.17  
 145.36  
 138.92  
 135.09  
 134.95  
 130.36  
 129.83  
 128.19  
 128.14  
 128.05  
 127.43  
 121.30  
 120.42  
 78.41  
 77.36  
 77.04  
 76.72  
 74.41  
 59.47  
 58.42

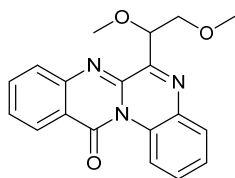

<sup>13</sup>C NMR (101M, CDCl<sub>3</sub>) of **3ae**

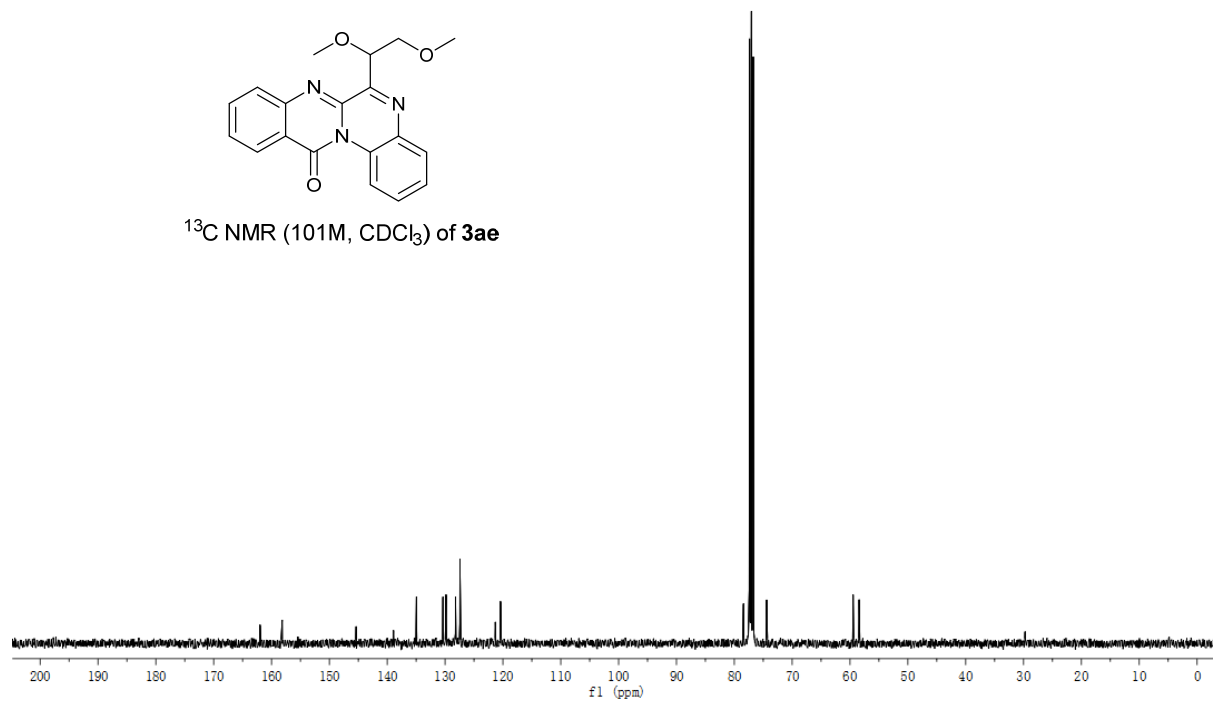

9.5799  
9.5754  
9.5585  
9.5550  
8.4617  
8.4519  
8.4395  
8.4359  
8.0515  
8.0443  
8.0333  
8.0274  
7.8743  
7.8612  
7.8447  
7.8242  
7.6130  
7.5744  
7.5481  
7.5155  
5.7327  
5.7164  
5.7001  
5.6838  
3.7507  
3.6980  
3.6275  
3.5870

1.6715  
1.6552  
1.3192  
1.3017  
1.2843

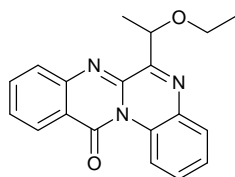

<sup>1</sup>H NMR (400M, CDCl<sub>3</sub>) of 3af

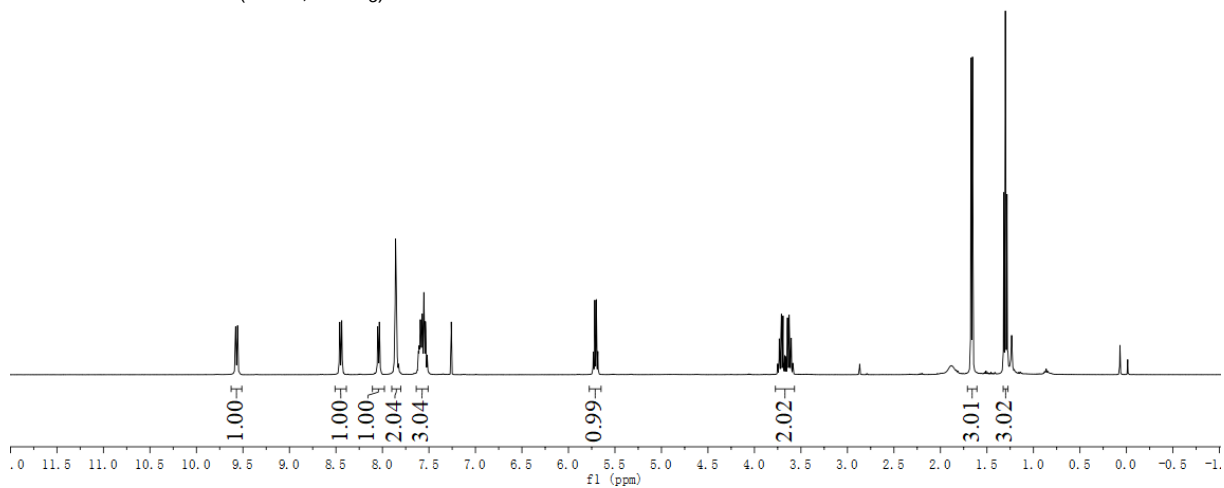

162.12  
162.02  
145.40  
138.66  
135.18  
134.83  
130.15  
129.42  
128.05  
128.02  
127.97  
127.35  
127.33  
121.24  
120.35  
77.40  
77.08  
76.77  
73.22  
65.29

-20.25  
-15.59

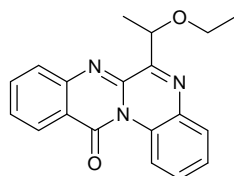

<sup>13</sup>C NMR (101M, CDCl<sub>3</sub>) of 3af

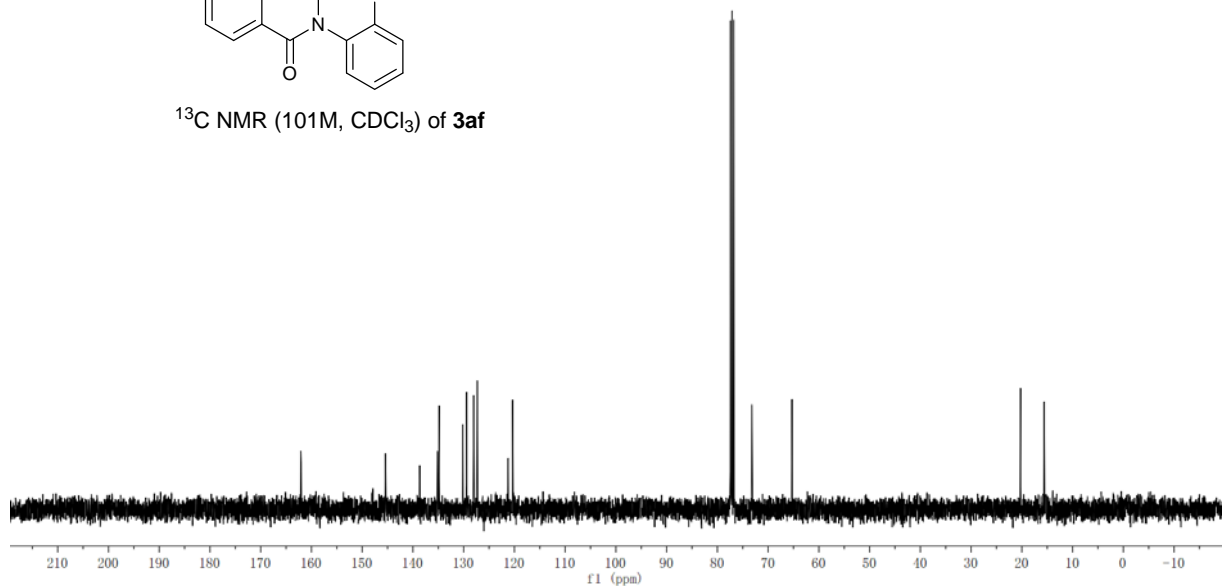

9.5804  
9.5760  
9.5600  
9.5556  
8.4571  
8.4536  
8.4369  
8.4334  
7.9162  
7.8923  
7.8493  
7.8289  
7.6136  
7.5346  
7.5289  
7.4926  
5.4260  
5.4139  
5.4081  
5.3963  
2.9920  
2.9469  
2.9312  
2.8986  
2.5150  
2.4836  
2.4634  
2.4173  
2.3056  
2.2751  
2.2599  
2.1361

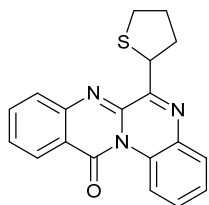

$^1\text{H}$  NMR (400M,  $\text{CDCl}_3$ ) of **3ag**

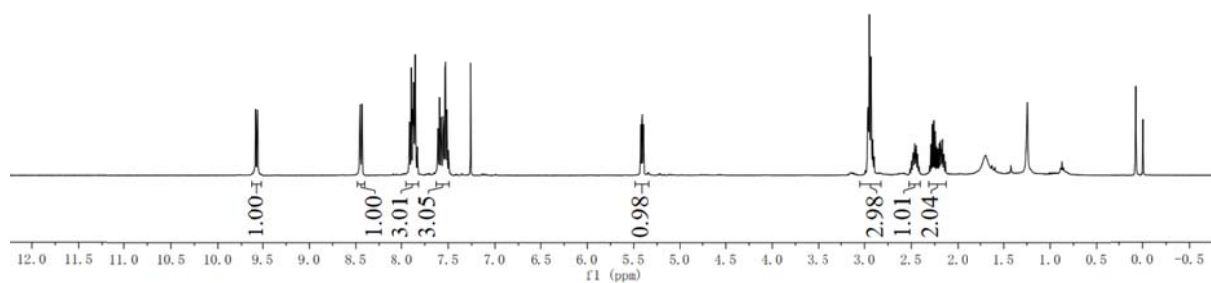

162.09  
161.62  
145.30  
139.15  
135.02  
134.80  
129.76  
129.12  
128.16  
128.08  
127.91  
127.28  
127.17  
121.16  
120.46  
77.38  
77.06  
76.75  
-47.80  
33.19  
32.12  
31.33

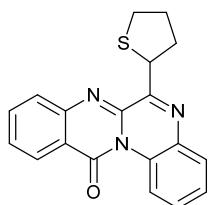

$^{13}\text{C}$  NMR (101M,  $\text{CDCl}_3$ ) of **3ag**

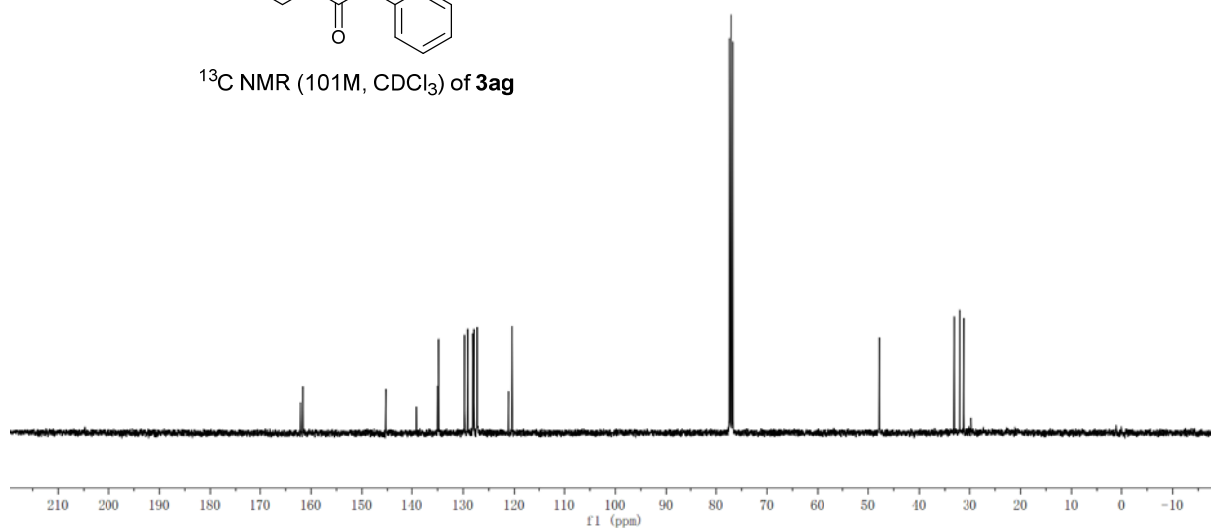

Supplement: d4cc00187g1.pdf [file d4cc00187g1.pdf]
